# Supplementary material for: Proteomic Analysis of Hydromethylthionine in the Line 66 Model of Frontotemporal Dementia Demonstrates Actions on Tau-Dependent and Tau-Independent Networks
Source: MDPI journal article supplement (doi:10.3390/cells10082162), 2021-08-22

# Supplementary Figure S1

A L66 vs. wild type

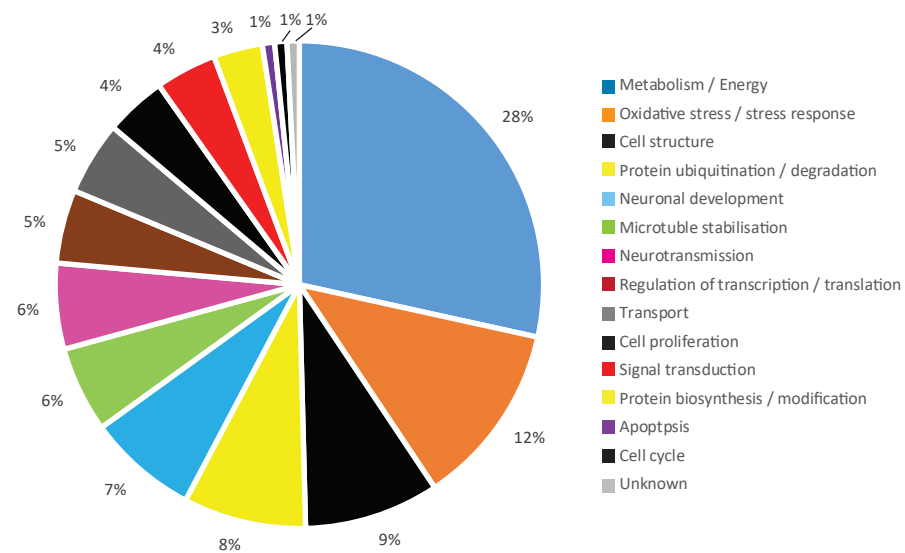

B L66 LMTM vs. L66 vehicle

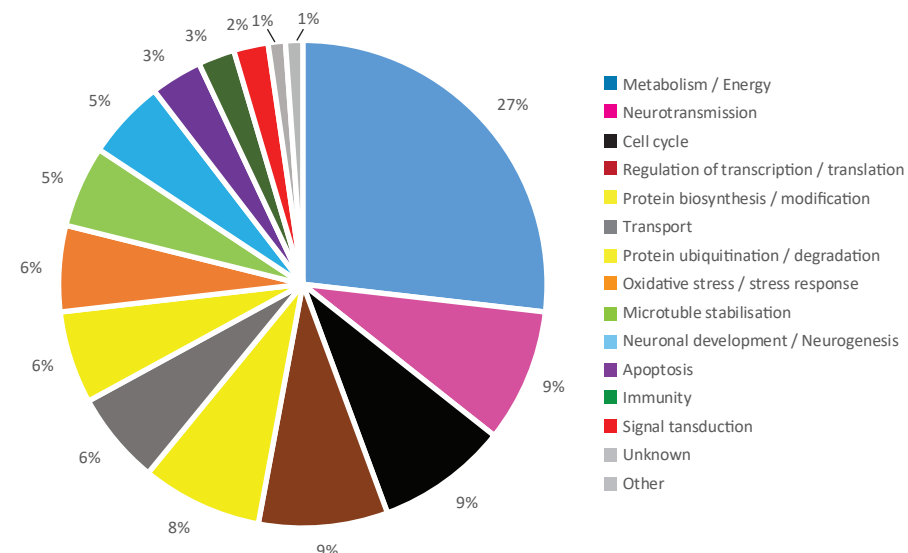

## Supplementary Figure S2

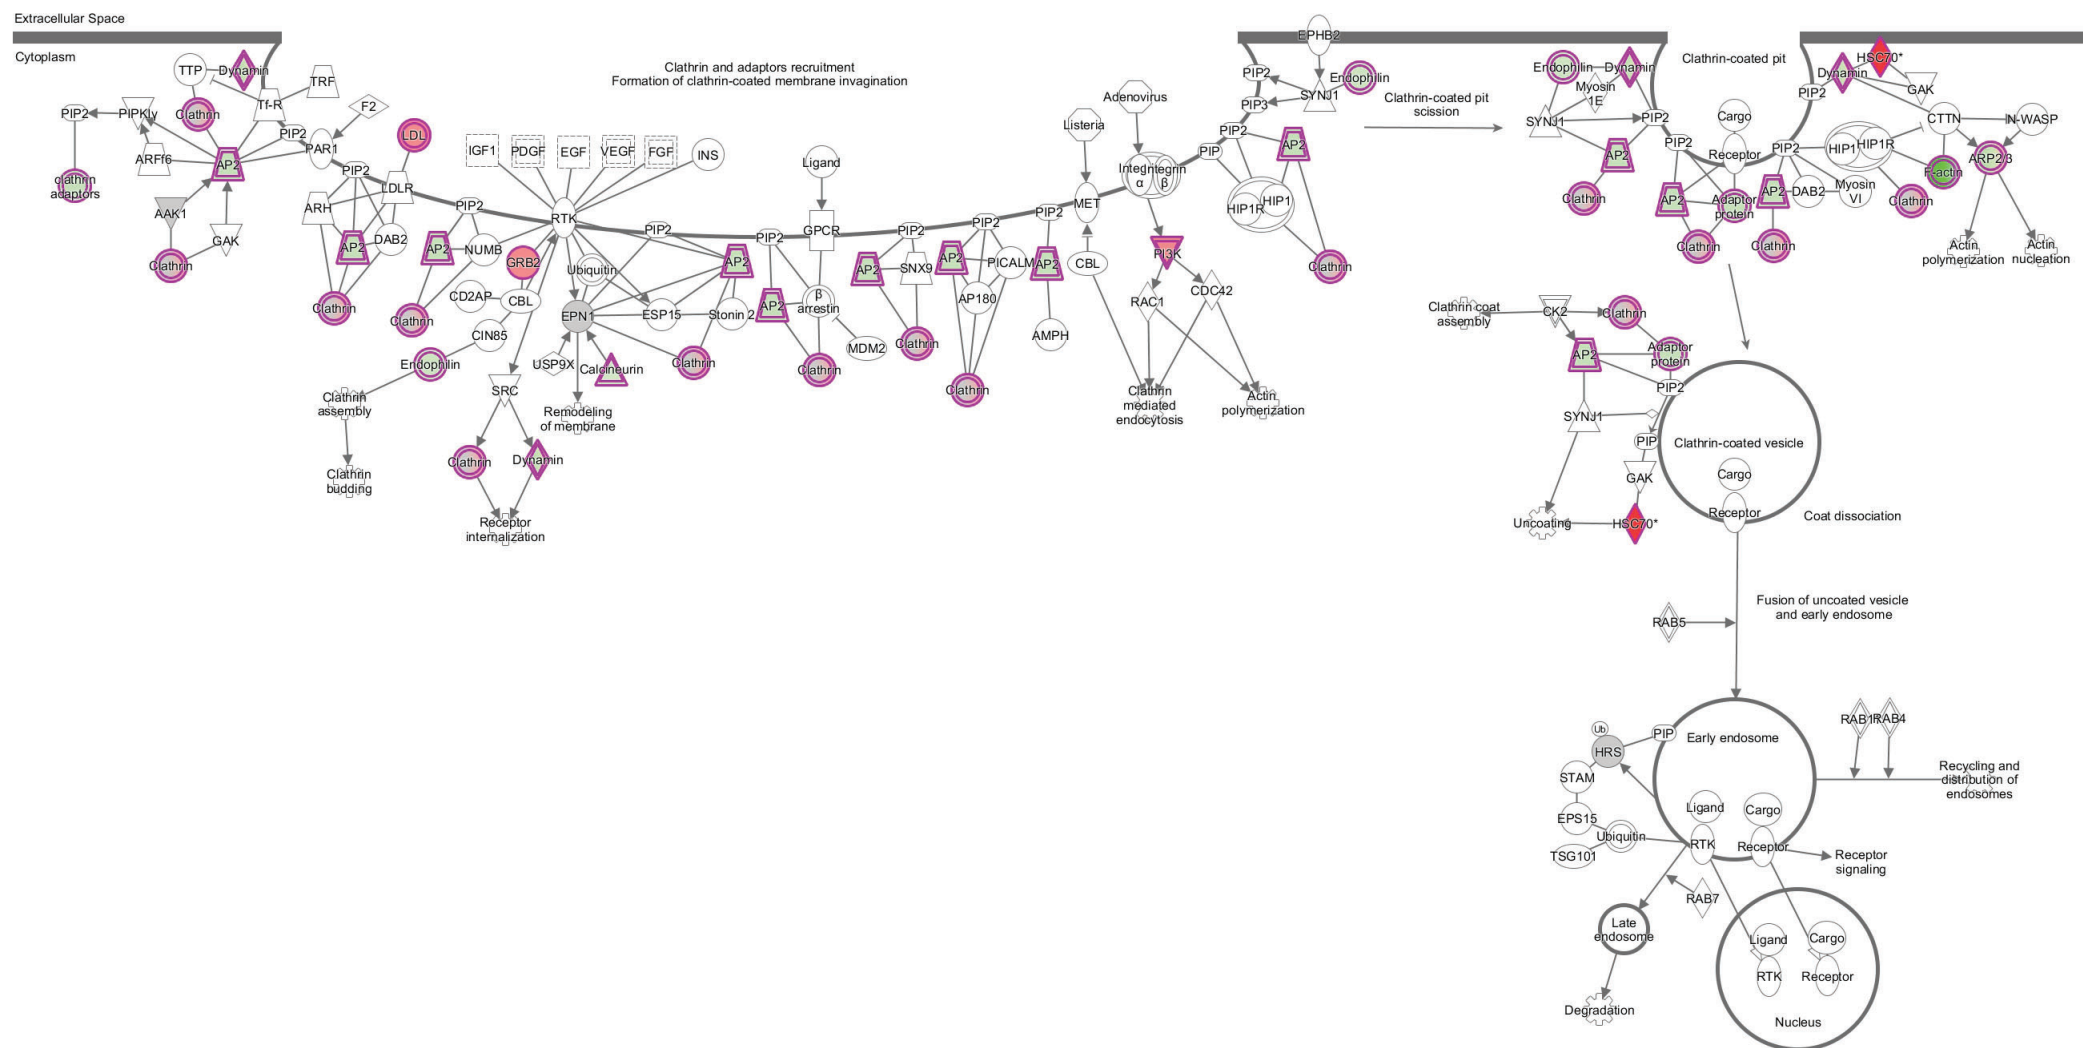

Supplementary Figure S3

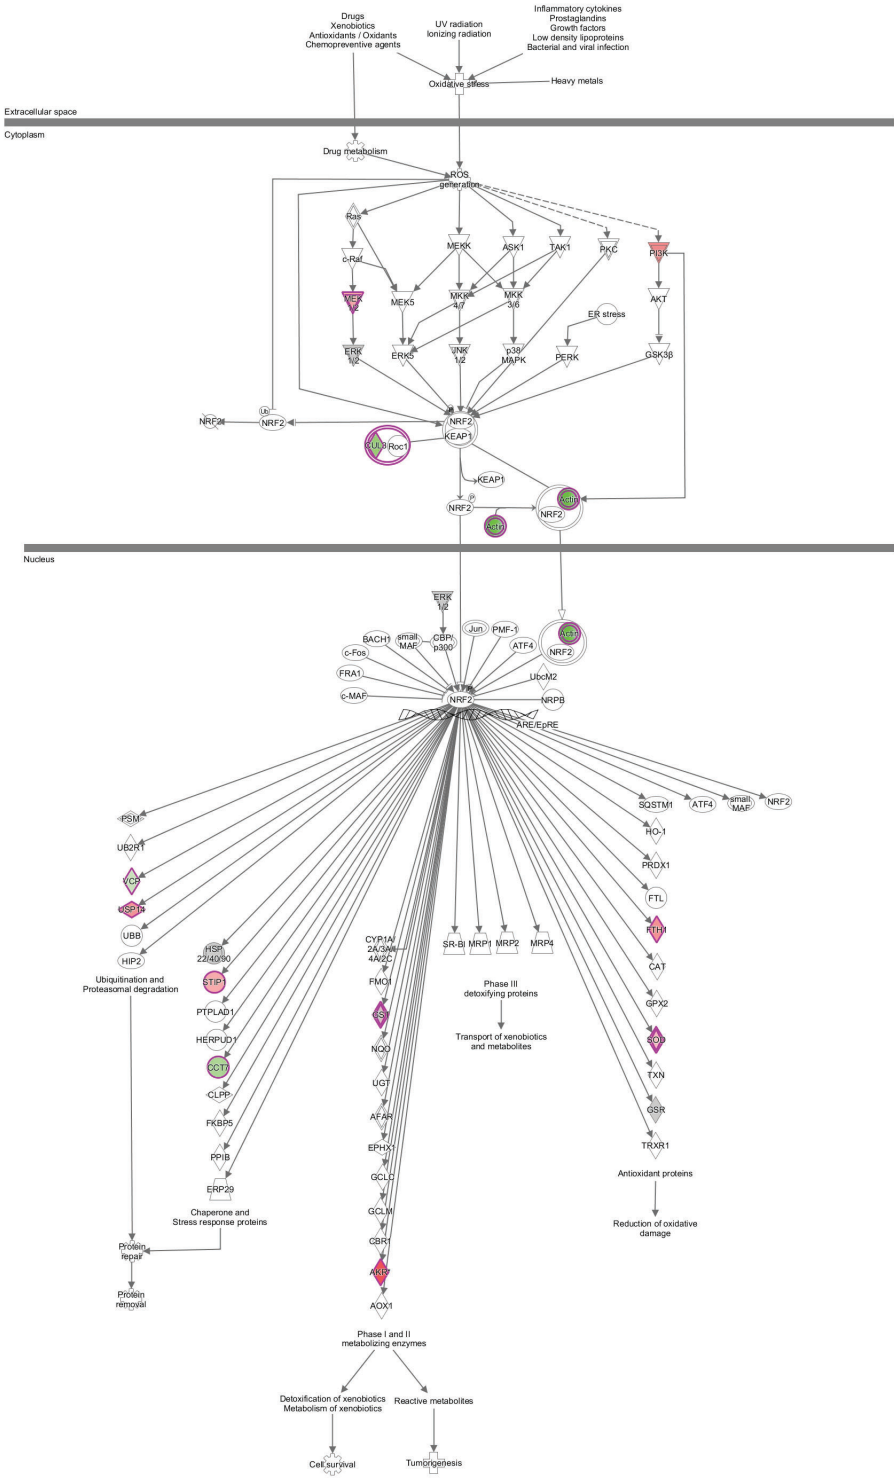

# Supplementary Figure S4

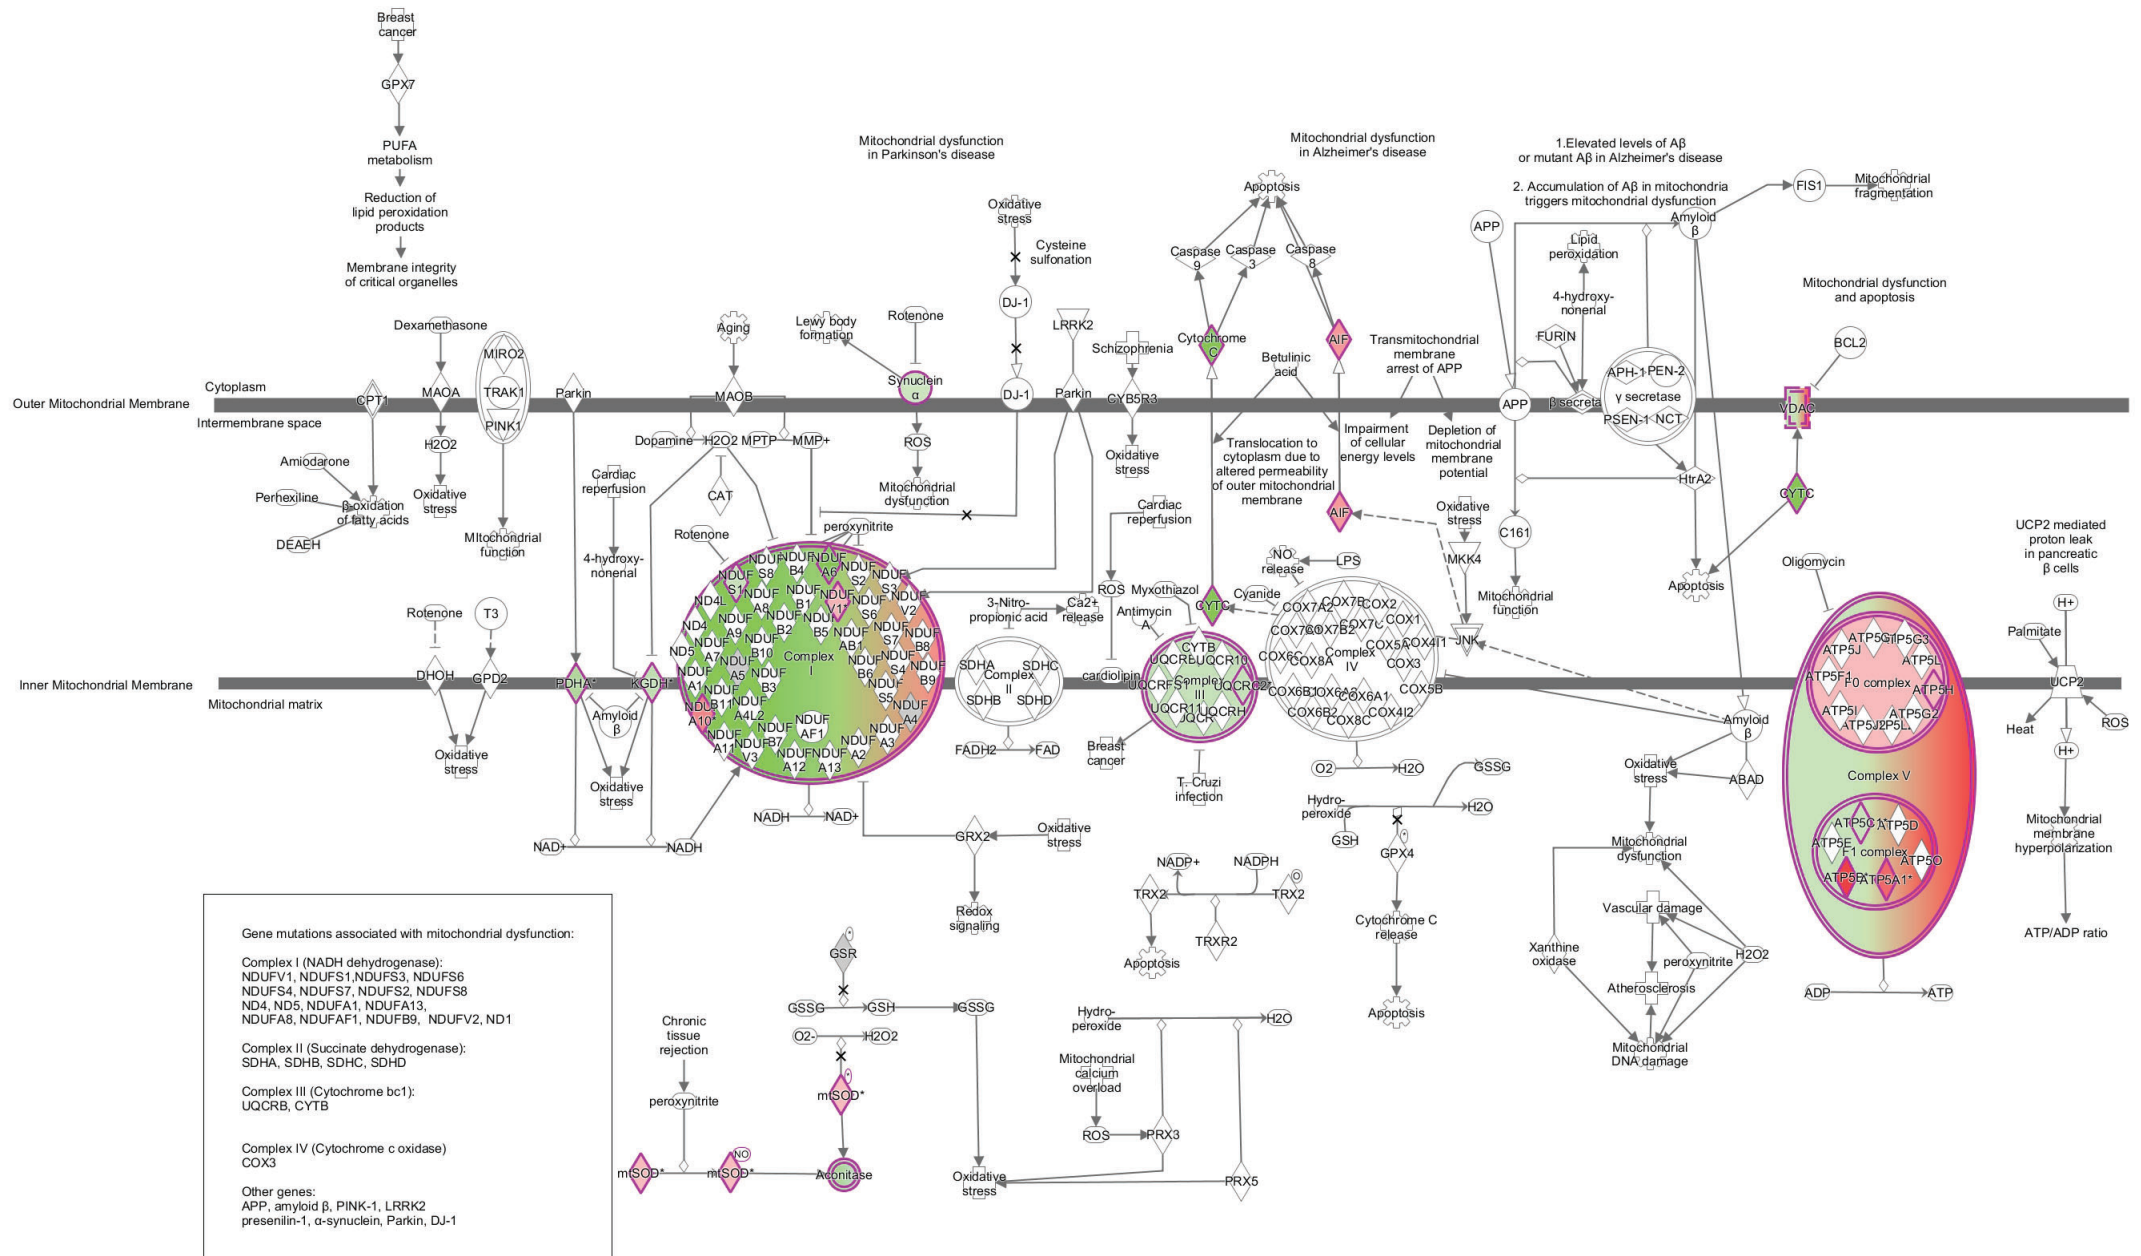

Supplementary Figure S5

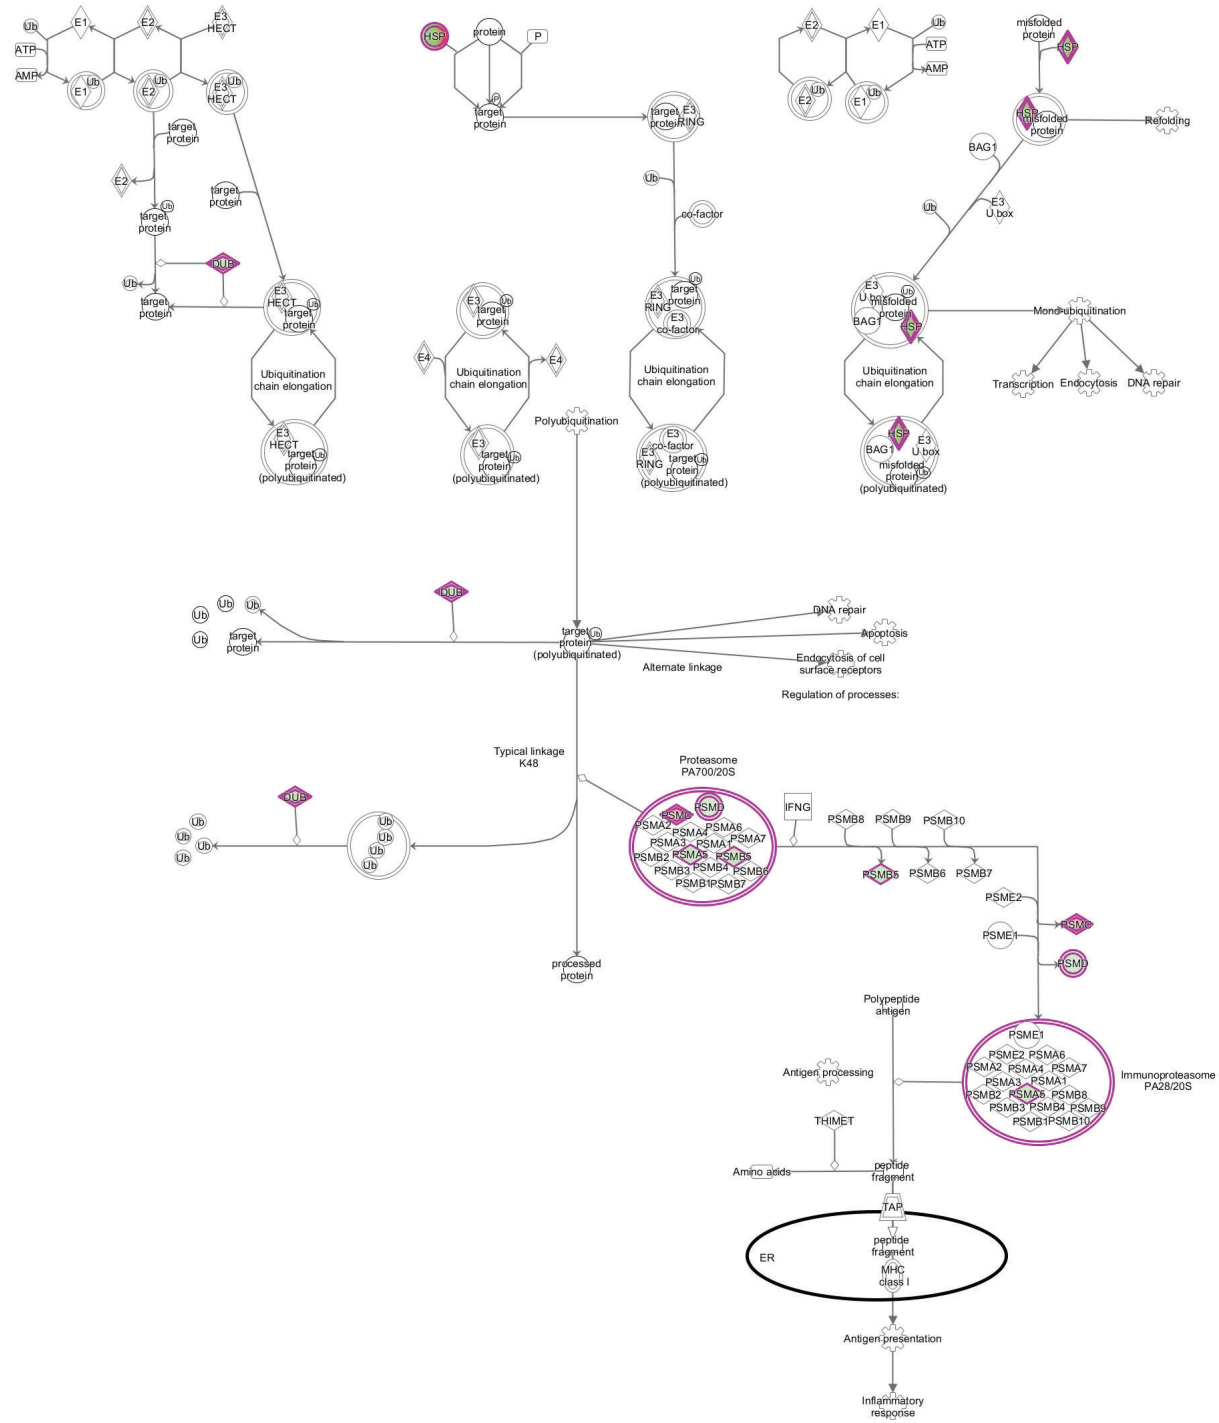

Supplement: s1 [file s1]
