# Supplementary material for: Proteomic Analysis of Hydromethylthionine in the Line 66 Model of Frontotemporal Dementia Demonstrates Actions on Tau-Dependent and Tau-Independent Networks
Source: Cells. 2021 Aug 22;10(8):2162. doi: 10.3390/cells10082162 (PMC8391171; doi:10.3390/cells10082162)
Supplement: Supplementary file 1 [file cells-10-02162-s001.zip › Schwab et al Supplementary Table.xlsx]

## Sheet: 2-DE-Raw values genotype effect
	RAW 2DE image analyses L66 vs NMRI
Spot ID	WT NMRI														L66
	Animal ID										Frequency in group	Average Intensity	SD	RF	Animal ID							Frequency in group	Average Intensity	SD	RF	T-test
	1	2	3	4	5	6	7	8	9	10					1	2	3	4	5	6	7
8	0.23	0.081	0.133	0.273	0.318	0.187	N.A.	N.A.	0.158	0.09	8	0.166	0.0796269	1	0.033	0.028	N.A.	0.042	0.022	N.A.	0.055	5	0.034	0.0115412	0.2059	0
20	0.111	0.05	0.027	0.088	0.099	0.08	0.03	0.057	0.07	0.031	10	0.057	0.0285659	36	0.088	0.14	0.142	0.053	0.139	0.065	0.133	7	0.101	0.0359319	1.7655	0.0251
53	0.064	0.151	0.208	0.095	0.119	0.098	0.096	0.151	0.094	0.175	10	0.118	0.0423425	19	0.13	0.463	0.263	0.158	0.242	0.215	0.175	7	0.217	0.102658	1.8375	0.0086
64	0.05	N.A.	0.017	0.037	0.025	0.041	N.A.	N.A.	0.024	0.06	7	0.033	0.01426	21	0.067	N.A.	0.053	0.05	0.08	N.A.	0.059	5	0.061	0.0107963	1.8417	0.0123
84	1.224	2.596	1.766	2.068	1.824	1.482	1.468	1.746	1.452	1.129	10	1.629	0.408602	70	1.457	1.38	1.148	1.833	1.212	1.129	1.055	7	1.295	0.248825	0.7946	0.0473
144	1.52	1.531	1.515	1.122	0.829	0.968	1.336	1.278	1.514	2.016	10	1.324	0.32131	56	1.611	1.704	1.785	1.774	1.486	1.629	1.442	7	1.628	0.123413	1.23	0.0363
166	0.191	0.058	0.098	0.235	0.226	0.067	0.041	0.05	0.081	0.034	10	0.086	0.0743511	2	0.317	0.458	0.451	0.386	0.358	0.336	0.472	7	0.392	0.0585843	4.5783	0.0001
182	0.209	0.132	0.168	0.351	0.166	0.195	0.27	0.17	0.203	0.158	10	0.194	0.061021	20	0.105	0.102	0.088	0.123	0.092	0.136	0.236	7	0.119	0.0475485	0.613	0.0091
241	0.114	N.A.	N.A.	0.088	N.A.	N.A.	N.A.	0.242	0.122	0.187	5	0.141	0.0561341	44	0.069	0.07	0.045	0.085	0.102	N.A.	0.117	6	0.078	0.0234994	0.5503	0.0311
277	0.11	0.165	0.124	0.112	0.19	N.A.	0.16	0.204	0.114	0.115	9	0.14	0.0345343	29	N.A.	N.A.	0.243	0.26	0.262	0.187	0.141	5	0.213	0.0473565	1.5222	0.0206
283	0.065	N.A.	N.A.	0.072	N.A.	N.A.	N.A.	N.A.	N.A.	0.086	3	0.074	0.00873053	33	N.A.	0.043	N.A.	0.025	0.012	N.A.	0.029	4	0.024	0.0110538	0.331	0.023
344	N.A.	0.013	0.021	N.A.	N.A.	N.A.	N.A.	N.A.	N.A.	N.A.	2	0.017	0.004	31	0.003	N.A.	N.A.	N.A.	0.002	N.A.	N.A.	2	0.002	0.0005	0.1365	0.0223
364	N.A.	0.161	0.304	0.302	N.A.	0.172	0.186	0.241	0.242	0.215	8	0.222	0.0514476	54	0.19	0.391	0.511	N.A.	0.388	0.257	0.531	6	0.355	0.123391	1.5996	0.0359
419	0.083	0.023	0.044	0.054	0.055	0.111	0.032	N.A.	N.A.	0.059	8	0.052	0.0263531	45	0.079	0.097	N.A.	0.315	0.59	0.05	0.234	6	0.16	0.186946	3.0802	0.0319
420	0.225	0.233	0.077	0.443	0.22	N.A.	0.137	N.A.	N.A.	N.A.	6	0.194	0.113449	63	0.419	N.A.	N.A.	0.278	0.301	0.583	0.38	5	0.379	0.108287	1.9499	0.042
430	0.264	0.171	0.173	0.157	0.271	0.201	0.332	0.173	0.259	0.283	10	0.221	0.0574582	35	0.405	0.467	0.259	0.71	0.249	0.207	0.53	7	0.37	0.167903	1.6728	0.0251
432	0.023	0.026	0.116	0.06	0.068	N.A.	N.A.	0.024	0.057	0.033	8	0.043	0.029776	32	0.02	0.017	N.A.	N.A.	0.025	0.022	0.033	5	0.023	0.0054626	0.5306	0.0227
447	0.005	0.042	0.037	0.003	0.032	0.04	N.A.	N.A.	N.A.	N.A.	6	0.018	0.0162147	71	N.A.	N.A.	0.097	N.A.	0.068	0.129	0.026	4	0.069	0.0379144	3.8797	0.0495
448	0.011	N.A.	0.018	0.016	0.025	0.065	0.02	N.A.	N.A.	N.A.	6	0.022	0.0180131	60	N.A.	N.A.	0.014	0.005	N.A.	0.013	0.007	4	0.009	0.00383243	0.4239	0.0388
449	0.065	0.117	0.13	0.074	0.046	0.054	0.134	N.A.	N.A.	0.02	8	0.069	0.0394937	69	0.106	N.A.	N.A.	0.279	0.216	0.064	0.239	5	0.158	0.0818618	2.2977	0.0458
450	0.023	0.039	0.019	0.032	0.01	N.A.	0.021	0.01	0.047	0.019	9	0.021	0.0118707	3	0.066	0.092	0.065	0.023	0.093	0.092	0.13	7	0.072	0.0307684	3.3549	0.0008
500	0.049	N.A.	0.037	0.016	0.019	N.A.	N.A.	N.A.	N.A.	0.037	5	0.029	0.0123548	68	N.A.	0.008	0.019	N.A.	0.012	0.019	N.A.	4	0.014	0.00471699	0.483	0.0457
451	0.56	0.39	0.565	0.598	0.314	0.194	0.562	0.598	0.389	0.94	10	0.472	0.193887	67	0.934	0.707	0.28	1.283	0.948	0.777	1.385	7	0.816	0.342704	1.7287	0.0455
452	N.A.	0.508	0.366	0.758	0.786	N.A.	2.417	N.A.	0.794	1.628	7	0.859	0.674394	66	0.224	N.A.	0.567	0.98	0.228	0.517	0.218	6	0.384	0.274794	0.4468	0.0452
453	0.165	0.32	N.A.	N.A.	0.1	N.A.	N.A.	N.A.	0.139	0.155	5	0.163	0.0754225	59	N.A.	0.276	N.A.	0.299	N.A.	N.A.	N.A.	2	0.287	0.0115	1.7641	0.0387
454	N.A.	N.A.	0.101	0.143	N.A.	0.136	N.A.	N.A.	N.A.	0.238	4	0.147	0.0507666	65	N.A.	0.101	0.053	N.A.	0.033	N.A.	0.092	4	0.063	0.0278512	0.4306	0.043
455	N.A.	0.02	0.058	0.189	0.096	0.31	0.052	N.A.	0.122	N.A.	7	0.088	0.0925064	64	0.029	0.009	0.033	N.A.	0.048	0.056	N.A.	5	0.03	0.016285	0.3371	0.0425
456	1.628	2.12	1.581	1.291	1.258	1.846	1.341	1.497	1.604	1.674	10	1.565	0.250026	58	2.344	1.903	1.682	1.699	1.898	1.822	1.592	7	1.836	0.229131	1.173	0.0383
457	0.05	0.061	0.045	0.084	0.21	0.263	0.06	N.A.	0.058	0.054	9	0.079	0.075591	62	0.034	0.017	0.014	0.043	N.A.	0.034	0.11	6	0.033	0.0320468	0.4195	0.0408
458	0.078	0.063	0.109	0.075	0.173	0.19	N.A.	N.A.	0.05	N.A.	7	0.094	0.0511045	61	N.A.	0.012	0.06	0.031	N.A.	0.016	0.087	5	0.032	0.0284352	0.3382	0.0405
459	0.031	0.04	0.016	0.074	0.034	N.A.	0.164	N.A.	0.024	0.01	8	0.035	0.047057	57	0.094	0.056	0.209	0.031	0.147	0.063	0.11	7	0.086	0.0564139	2.4863	0.0365
460	N.A.	0.004	N.A.	N.A.	0.048	N.A.	0.018	N.A.	0.02	0.011	5	0.015	0.0149987	55	0.005	0.003	N.A.	0.002	N.A.	N.A.	0.008	4	0.004	0.00229129	0.2549	0.0362
461	0.028	N.A.	0.024	0.022	N.A.	N.A.	N.A.	0.059	0.025	0.031	6	0.03	0.0126326	53	0.006	0.008	N.A.	N.A.	N.A.	0.02	0.017	4	0.012	0.00588961	0.39	0.0357
462	0.043	N.A.	0.121	0.066	0.034	N.A.	N.A.	0.038	0.105	0.044	7	0.057	0.0324031	52	0.102	0.111	0.091	N.A.	0.057	0.12	0.141	6	0.1	0.0259979	1.7514	0.0352
463	0.177	0.153	N.A.	N.A.	0.053	0.084	0.051	0.312	0.13	0.212	8	0.123	0.0826846	51	0.264	0.233	N.A.	0.232	N.A.	0.288	0.156	5	0.23	0.0445044	1.8681	0.0347
464	0.022	N.A.	N.A.	0.045	N.A.	0.009	0.007	N.A.	N.A.	0.03	5	0.018	0.0140371	50	N.A.	N.A.	N.A.	0.103	0.056	0.046	0.034	4	0.055	0.026157	3.0591	0.0343
465	0.102	0.079	0.052	0.048	0.061	0.042	0.046	0.071	0.093	0.074	10	0.064	0.0194874	49	0.092	0.118	0.077	0.078	0.066	0.074	0.114	7	0.086	0.0188669	1.3485	0.0337
466	0.854	0.522	1.053	0.843	0.714	0.773	0.494	0.969	0.791	0.477	10	0.724	0.188356	48	0.471	0.639	0.402	0.658	0.433	0.776	0.34	7	0.511	0.148393	0.7062	0.0325
467	0.114	0.055	0.037	0.021	0.127	0.053	0.044	0.028	0.064	0.041	10	0.05	0.0334072	47	0.047	0.007	0.013	0.032	0.018	0.037	N.A.	6	0.021	0.014091	0.4254	0.0322
468	0.023	N.A.	0.033	0.049	0.052	0.067	N.A.	N.A.	0.034	0.024	7	0.038	0.0150401	46	0.008	0.021	N.A.	0.018	0.021	N.A.	0.032	5	0.018	0.00766812	0.4898	0.0322
469	0.048	N.A.	0.049	0.014	0.052	0.088	N.A.	0.085	0.082	0.052	8	0.052	0.0234241	43	0.078	0.1	N.A.	N.A.	0.098	N.A.	0.095	4	0.092	0.00869986	1.7786	0.0307
470	0.078	0.058	0.042	0.082	0.04	N.A.	0.047	0.023	0.063	0.035	9	0.049	0.0186548	42	0.083	0.05	0.063	0.055	0.091	0.086	0.094	7	0.073	0.0167746	1.4929	0.0307
471	0.222	0.126	N.A.	0.064	0.082	0.03	0.077	0.053	N.A.	N.A.	7	0.078	0.0591798	41	0.124	0.25	0.426	0.284	0.106	N.A.	0.099	6	0.185	0.118409	2.3527	0.0305
472	0.045	0.097	0.056	0.033	N.A.	N.A.	N.A.	0.02	N.A.	0.031	6	0.041	0.0250533	40	N.A.	0.01	N.A.	N.A.	0.03	0.019	0.018	4	0.018	0.00711952	0.4371	0.0304
473	N.A.	0.154	0.073	0.043	N.A.	0.011	0.049	N.A.	0.083	0.044	7	0.051	0.0420976	39	0.162	0.184	N.A.	0.07	N.A.	N.A.	0.16	4	0.136	0.0437493	2.6347	0.0304
474	0.047	0.027	0.056	N.A.	N.A.	0.015	0.029	0.031	0.06	0.013	8	0.03	0.0166189	38	0.056	0.047	N.A.	0.079	0.087	0.051	0.035	6	0.057	0.0181514	1.8582	0.027
475	0.015	N.A.	0.057	N.A.	0.075	0.105	N.A.	N.A.	0.058	0.094	6	0.057	0.0292157	37	N.A.	N.A.	0.03	N.A.	0.01	0.013	0.03	4	0.019	0.00931061	0.3239	0.0254
476	0.073	0.158	N.A.	0.059	0.1	N.A.	N.A.	N.A.	N.A.	0.191	5	0.105	0.0504833	34	0.006	N.A.	N.A.	0.057	0.016	0.069	0.009	5	0.02	0.02628	0.194	0.0243
477	0.049	N.A.	0.062	0.049	0.154	0.255	0.05	N.A.	0.092	N.A.	7	0.083	0.0718468	30	0.019	0.018	N.A.	0.074	0.052	0.029	0.039	6	0.034	0.019721	0.4063	0.0216
478	0.106	N.A.	0.026	0.043	0.044	N.A.	0.11	N.A.	0.067	0.013	7	0.047	0.0349647	28	N.A.	0.008	0.027	N.A.	0.008	0.021	0.024	5	0.015	0.00806474	0.3288	0.0203
479	0.07	N.A.	N.A.	0.051	N.A.	N.A.	N.A.	0.075	0.025	0.097	5	0.058	0.0242289	27	0.03	0.031	0.012	N.A.	0.045	0.02	0.018	6	0.024	0.0107858	0.4117	0.0185
480	0.078	0.033	0.041	0.104	0.017	0.037	0.066	0.059	0.106	0.084	10	0.055	0.0289733	26	N.A.	0.147	0.081	0.103	0.077	0.091	0.089	6	0.096	0.0234023	1.7496	0.0183
481	0.069	0.066	N.A.	0.057	0.033	N.A.	0.031	N.A.	0.08	N.A.	6	0.053	0.0182574	25	0.108	N.A.	0.074	0.076	0.099	N.A.	0.111	5	0.092	0.0157048	1.7475	0.0171
482	0.054	N.A.	0.082	0.08	0.029	N.A.	N.A.	0.044	0.049	0.064	7	0.055	0.0178394	24	0.013	0.057	N.A.	0.025	0.007	0.022	0.022	6	0.02	0.01585	0.3662	0.0157
483	0.525	0.592	0.394	0.465	0.499	0.576	0.454	0.327	0.413	0.353	10	0.452	0.0850821	23	0.52	0.508	0.552	0.629	0.553	0.505	0.622	7	0.554	0.0476741	1.2252	0.0139
484	N.A.	N.A.	0.058	0.015	0.05	0.194	N.A.	N.A.	0.076	N.A.	5	0.058	0.0610102	22	0.009	N.A.	N.A.	N.A.	0.009	0.017	0.011	4	0.011	0.00327872	0.1906	0.0128
485	0.175	0.135	0.174	0.197	0.431	0.268	0.19	0.238	0.168	0.2	10	0.207	0.0793665	18	0.126	0.16	0.104	0.111	0.098	0.164	0.199	7	0.133	0.0348624	0.644	0.0081
486	0.031	N.A.	0.021	0.029	N.A.	N.A.	N.A.	N.A.	0.041	0.018	5	0.027	0.00809938	17	0.013	0.013	N.A.	N.A.	N.A.	0.017	0.013	4	0.014	0.00173205	0.5143	0.0074
487	0.155	0.156	0.128	0.075	0.101	0.093	0.104	0.331	0.14	0.118	10	0.129	0.0684404	16	0.196	0.246	0.363	N.A.	0.167	N.A.	0.33	5	0.249	0.075431	1.9368	0.0073
488	0.084	0.167	0.098	0.114	0.095	0.1	0.118	N.A.	0.145	N.A.	8	0.112	0.0261937	15	0.164	0.264	N.A.	0.155	N.A.	0.195	0.147	5	0.181	0.0427224	1.6103	0.0068
489	0.151	0.114	0.123	0.145	0.099	N.A.	0.082	N.A.	0.127	0.107	8	0.117	0.0215523	14	N.A.	0.204	0.176	0.15	0.169	0.152	0.125	6	0.161	0.0245606	1.38	0.0066
490	2.077	2.064	1.859	N.A.	1.266	1.224	1.928	1.553	1.269	2.169	9	1.671	0.364056	13	2.675	2.286	2.035	2.172	2.549	2.152	2.023	7	2.259	0.23357	1.3514	0.0055
491	0.036	N.A.	0.118	0.039	N.A.	0.03	0.04	0.055	N.A.	0.077	7	0.051	0.0290461	12	0.017	0.047	N.A.	0.02	0.019	0.02	0.02	6	0.022	0.010415	0.4373	0.0052
492	N.A.	0.188	0.385	0.202	0.543	0.458	N.A.	0.369	0.562	0.113	8	0.31	0.157999	11	0.099	N.A.	N.A.	N.A.	0.162	0.131	0.073	4	0.111	0.0334617	0.3595	0.0037
493	0.076	0.036	0.09	0.058	0.042	N.A.	0.027	0.016	0.047	0.015	9	0.038	0.024298	10	0.012	0.012	0.017	N.A.	0.025	0.016	0.017	6	0.016	0.00434933	0.4123	0.0033
494	N.A.	0.116	0.031	0.01	0.15	N.A.	0.053	N.A.	0.272	0.031	7	0.059	0.0861688	9	N.A.	0.817	0.577	0.248	0.244	N.A.	0.403	5	0.41	0.217238	6.9846	0.0032
495	0.225	0.377	0.32	0.072	0.447	N.A.	0.41	0.377	0.278	0.294	9	0.281	0.106971	8	0.128	0.11	0.168	0.147	0.091	0.091	0.196	7	0.128	0.0367851	0.4557	0.0032
496	0.039	0.008	0.039	N.A.	N.A.	N.A.	0.066	0.025	0.064	0.019	7	0.031	0.0203078	7	0.006	0.014	0.006	0.011	0.011	N.A.	0.009	6	0.009	0.00287228	0.2875	0.0031
497	N.A.	N.A.	0.029	0.035	N.A.	N.A.	N.A.	0.03	0.019	0.046	5	0.031	0.00879545	6	N.A.	0.009	N.A.	N.A.	0.018	0.01	0.012	4	0.012	0.00349106	0.3821	0.003
498	0.06	N.A.	0.089	N.A.	N.A.	N.A.	N.A.	N.A.	N.A.	0.045	3	0.062	0.0182635	5	0.511	N.A.	N.A.	0.34	0.267	N.A.	0.391	4	0.367	0.0889111	5.9292	0.0025
499	0.158	0.052	0.086	0.083	0.091	0.042	0.026	0.147	0.085	0.164	10	0.081	0.0460091	4	0.215	0.205	0.222	0.183	0.187	0.134	0.199	7	0.19	0.0270366	2.3501	0.0013

## Sheet: 2-DE-Raw values LMTM effect
	RAW 2DE image analyses LMTM effetct in Line 66
Spot ID	L62, vehicle controls																L62, 15mg/kg MT																L62, 45mg/kg MT
	Animal ID												Frequency in group	Average Intensity	SD		Animal ID											Frequency in group	Average Intensity	SD	vs. untreated																Frequency in group	Average Intensity	SD
	1	2	3	4	5	6	7	8	9	10	11	12				RF	49	52	53	54	55	57	58	59	60	61	62				RF	T-test	105	106	107	108	109	110	111	112	113	114	115	116	117	118
1	1.003	1.054	1.228	0.918	1.072	1.326	0.889	0.922	0.735	0.754	0.757	0.793	12	0.938	0.18235	1	0.37	0.552	0.543	0.407	0.501	0.618	0.432	0.347	0.395	0.325	0.489	11	0.444	0.0900275	0.4734	0	0.603	0.447	0.514	0.511	0.534	0.419	0.412	0.471	0.598	0.417	0.426	0.447	0.617	0.547	14	0.492	0.0714599
2	0.092	0.077	0.079	0.08	0.097	0.133	0.071	0.059	0.07	0.044	0.071	0.051	12	0.074	0.0223308	1	0.207	0.152	0.362	0.242	0.399	0.174	0.272	0.164	0.186	0.277	0.387	11	0.243	0.0868859	3.2836	0	0.191	0.126	0.224	0.218	0.309	0.419	0.265	0.24	0.313	0.309	0.096	0.183	0.083	0.259	14	0.211	0.0937748
3	0.34	0.304	0.317	0.225	0.544	0.294	0.373	0.361	0.279	0.228	0.319	0.214	12	0.307	0.0847875	1	N.A.	0.086	0.082	N.A.	0.1	0.078	N.A.	0.056	0.115	N.A.	0.065	7	0.081	0.0185197	0.2639	0	N.A.	0.081	0.082	N.A.	0.114	0.062	0.078	0.08	0.091	0.105	N.A.	0.064	N.A.	0.076	10	0.082	0.0172826
4	0.528	0.527	0.349	N.A.	N.A.	0.469	0.412	0.448	0.354	0.29	0.403	0.415	10	0.413	0.0727808	1	0.707	0.777	0.713	0.842	0.674	0.982	0.662	0.825	0.851	0.865	1.057	11	0.806	0.119799	1.9512	0	0.934	0.946	0.645	0.72	0.596	0.82	0.596	0.718	0.95	0.806	0.8	0.901	0.892	1.011	14	0.798	0.128795
5	0.654	0.416	0.638	0.63	0.496	0.864	0.775	0.565	0.644	0.828	0.537	0.632	12	0.627	0.126251	1	0.365	0.309	0.362	0.347	0.379	0.423	0.435	0.347	0.319	0.278	0.318	11	0.35	0.0452658	0.5577	0	0.35	0.37	0.29	0.661	0.392	0.396	0.269	0.318	0.304	0.398	0.347	0.319	0.346	0.386	14	0.359	0.098835
6	1.032	N.A.	0.893	0.817	1.069	1.121	1.023	1.325	0.897	0.951	0.907	0.884	11	0.984	0.13686	1	0.757	0.755	0.477	0.422	0.523	0.49	0.365	0.44	0.527	0.392	0.536	11	0.503	0.124591	0.5113	0	0.34	0.465	0.508	0.899	0.534	0.772	0.601	0.497	0.574	0.615	0.517	0.436	0.737	0.501	14	0.555	0.133682
7	0.694	0.461	0.34	0.567	0.505	0.605	0.601	0.557	0.51	0.512	0.297	0.443	12	0.495	0.107138	1	0.28	0.231	0.232	0.291	0.331	0.309	0.198	0.269	0.279	0.303	0.252	11	0.268	0.0374466	0.541	0	0.199	0.345	0.217	0.343	0.286	0.278	0.297	0.396	0.314	0.348	0.296	0.345	0.507	0.458	14	0.321	0.0705682
8	0.194	0.179	0.187	0.185	0.184	0.19	0.202	0.301	0.229	0.303	0.196	0.299	12	0.216	0.0478994	1	0.359	0.382	0.342	0.335	0.485	0.379	0.611	0.322	0.278	0.431	0.408	11	0.385	0.0870494	1.7829	0	0.311	0.447	0.366	0.341	0.468	0.341	0.115	0.335	0.262	0.312	0.392	0.305	0.319	0.319	14	0.317	0.0819445
9	0.075	0.066	0.064	0.062	0.098	0.098	0.05	0.062	0.052	0.044	0.059	0.057	12	0.064	0.0164035	1	0.117	0.111	0.115	0.108	0.133	0.125	0.113	0.109	0.099	0.113	0.121	11	0.115	0.00868075	1.8018	0	0.141	0.088	0.114	0.087	0.107	0.097	0.087	0.114	0.108	0.119	0.095	0.103	0.111	0.115	14	0.105	0.0105697
10	0.088	0.121	0.102	0.053	0.109	0.11	0.057	0.139	0.1	0.078	0.097	0.074	12	0.091	0.0243002	1	0.153	0.174	0.151	0.198	0.199	0.207	N.A.	0.189	0.166	0.138	0.16	10	0.172	0.0224466	1.8959	0	0.089	0.171	0.233	0.218	0.152	0.154	0.16	0.175	0.186	0.135	0.17	0.159	0.087	0.154	14	0.155	0.0308175
11	0.323	0.338	0.197	0.38	0.243	0.373	0.38	0.42	0.476	0.463	0.368	0.433	12	0.356	0.0794154	1	0.166	0.141	0.156	0.32	0.274	0.146	0.148	0.137	0.171	0.188	0.2	11	0.179	0.0563229	0.5029	0	0.45	0.151	0.187	0.257	0.128	0.358	0.16	0.462	0.194	0.155	0.419	0.146	0.412	0.39	14	0.248	0.123238
12	0.626	0.739	0.63	0.569	0.551	0.768	0.979	0.729	0.77	0.811	0.659	0.752	12	0.707	0.113056	1	0.534	0.524	0.475	0.491	0.51	0.56	0.488	0.482	0.505	0.324	0.533	11	0.489	0.0589284	0.6919	0	0.505	0.518	0.509	0.486	0.645	0.597	0.582	0.548	0.509	0.635	0.53	0.449	0.597	0.554	14	0.545	0.0583709
13	0.088	0.133	0.1	N.A.	N.A.	0.21	0.105	0.114	0.138	0.091	0.215	0.152	10	0.128	0.0436307	1	0.277	0.285	0.246	0.358	0.341	0.295	0.28	0.261	0.22	0.232	0.318	11	0.28	0.0413741	2.1837	0	0.308	0.35	0.33	0.314	0.269	0.292	0.213	0.418	0.276	0.252	0.364	0.295	0.396	0.307	14	0.309	0.0588852
14	0.446	0.414	0.409	0.371	0.296	0.429	0.489	0.468	0.442	0.443	0.482	0.469	12	0.426	0.0515216	1	0.639	0.64	0.69	0.682	0.696	0.669	0.586	0.621	0.668	0.381	0.759	11	0.631	0.092214	1.4794	0	0.629	0.704	0.773	0.545	0.673	0.638	0.624	0.613	0.615	0.693	0.606	0.719	0.762	0.64	14	0.657	0.0572983
15	0.085	0.093	0.118	0.083	0.086	0.139	0.209	0.138	0.156	0.161	0.17	0.166	12	0.128	0.039201	1	0.324	0.218	0.231	0.181	0.288	N.A.	N.A.	0.233	0.392	0.233	0.251	9	0.255	0.0602546	1.9942	0	0.188	0.218	0.233	0.194	0.277	N.A.	0.101	0.206	0.197	0.354	0.201	0.228	0.148	0.151	13	0.199	0.0671507
16	0.172	0.184	0.258	0.41	0.287	0.238	0.199	0.228	0.264	0.255	0.189	0.213	12	0.235	0.0613249	1	0.544	0.579	0.345	0.401	0.349	0.505	0.553	0.409	0.383	0.523	0.243	11	0.426	0.10263	1.8151	0	0.244	0.235	0.435	0.348	0.505	0.176	0.294	0.196	0.375	0.507	0.27	0.342	0.423	0.278	14	0.314	0.105195
17	0.289	0.144	0.295	N.A.	0.313	0.162	0.394	0.337	0.26	0.236	0.25	0.243	11	0.256	0.069035	1	0.505	0.368	0.56	0.502	0.444	0.432	0.446	0.477	0.447	0.528	0.618	11	0.48	0.0654038	1.8763	0	0.182	0.509	0.434	0.296	0.416	0.459	0.182	0.388	0.536	0.54	0.464	0.572	0.45	0.318	14	0.388	0.112323
18	1.693	1.195	1.236	1.423	1.346	1.637	1.621	1.049	1.035	1.176	0.935	0.925	12	1.246	0.260905	1	0.905	0.764	0.885	0.633	0.932	0.887	0.886	0.924	0.808	0.727	0.773	11	0.824	0.0913429	0.6612	0	0.754	0.74	0.858	1.109	0.858	1.345	1.215	0.772	0.903	0.998	0.84	1.001	1.044	1.163	14	0.956	0.167116
19	0.433	0.576	0.645	0.389	0.654	0.718	0.642	0.464	0.542	0.538	0.36	0.371	12	0.514	0.117819	1	0.305	0.322	0.337	0.308	N.A.	0.379	N.A.	0.291	0.311	N.A.	0.338	8	0.323	0.0256634	0.6281	0	0.29	0.307	0.341	0.507	0.329	0.32	0.361	0.334	0.515	0.326	0.32	0.302	0.364	0.363	14	0.35	0.0703372
20	0.278	0.229	0.191	0.184	0.184	0.216	0.293	0.196	0.185	0.165	0.189	0.152	12	0.202	0.0408184	1	0.173	0.118	0.12	0.091	0.158	0.066	0.066	0.125	0.101	0.084	0.068	11	0.101	0.0347335	0.5003	0	0.076	0.107	0.063	0.082	0.063	0.207	0.073	0.138	0.069	0.128	0.068	0.168	0.068	0.098	14	0.093	0.0461091
21	0.415	0.454	0.398	0.715	0.436	0.485	0.442	0.521	0.342	0.346	0.433	0.643	12	0.458	0.106578	1	0.617	0.671	0.792	0.917	0.742	0.941	0.551	0.626	0.577	0.769	0.906	11	0.725	0.134138	1.5819	0	0.936	0.637	0.808	0.913	0.73	0.63	0.803	0.775	0.972	0.735	0.782	0.619	1.212	1.019	14	0.812	0.17002
22	0.2	0.271	0.172	0.179	0.245	0.134	0.234	0.253	0.185	0.233	0.168	0.29	12	0.209	0.0454685	1	0.358	0.288	0.279	0.301	0.41	0.389	0.339	0.288	0.325	0.254	0.371	11	0.324	0.0477938	1.5531	0	0.327	0.351	0.252	0.391	0.352	0.29	0.268	0.308	0.286	0.298	0.268	0.279	0.163	0.32	14	0.291	0.054329
23	0.185	0.294	0.346	0.268	0.247	0.297	0.552	0.371	0.381	0.509	0.55	0.401	12	0.349	0.11447	1	0.767	0.755	0.723	0.545	0.734	0.756	0.809	0.443	0.403	0.783	0.679	11	0.656	0.135339	1.8811	0	0.773	0.701	0.644	0.632	0.717	N.A.	0.299	0.437	0.549	0.658	0.405	0.624	0.341	0.776	13	0.557	0.155859
24	0.145	0.229	0.187	0.055	0.176	0.081	0.276	0.148	0.234	0.421	0.249	0.392	12	0.188	0.105844	1	0.598	0.564	0.647	0.374	0.473	0.568	0.337	0.715	0.687	0.556	0.585	11	0.542	0.113417	2.8862	0	0.451	0.691	0.482	0.431	0.645	0.571	0.428	0.556	0.449	0.701	0.434	0.61	0.254	0.562	14	0.504	0.12104
25	0.407	0.202	0.283	0.301	0.375	0.374	0.245	0.242	0.274	0.19	0.188	0.243	12	0.268	0.071329	1	0.138	0.154	0.178	0.243	0.165	0.132	0.209	0.162	0.168	0.106	0.133	11	0.159	0.0364127	0.5915	0	0.226	0.16	0.195	0.162	0.248	0.192	0.17	0.186	0.169	0.178	0.182	0.138	0.201	0.185	14	0.183	0.026111
26	0.102	0.079	0.183	0.074	0.18	0.205	0.045	0.119	0.11	0.102	0.145	0.158	12	0.115	0.047182	1	0.233	0.321	0.27	0.336	0.23	0.257	0.253	0.137	0.26	0.215	0.328	11	0.251	0.0547935	2.1823	0.0001	0.198	0.282	0.12	0.144	0.217	0.312	0.183	0.16	0.301	0.25	0.195	0.137	0.146	0.222	14	0.196	0.0584224
27	0.243	0.383	0.323	0.256	0.247	0.284	0.355	0.274	0.246	0.244	0.287	0.252	12	0.279	0.0450534	1	0.209	0.187	0.19	0.171	0.184	0.149	0.135	0.22	0.203	0.082	0.173	11	0.168	0.0373144	0.5998	0.0001	0.113	0.183	0.149	0.09	0.189	0.266	0.161	0.179	0.13	0.25	0.214	0.216	0.174	0.197	14	0.172	0.0480943
28	0.281	0.294	0.317	0.346	0.331	0.45	0.305	0.298	0.353	0.264	0.346	0.369	12	0.326	0.0472855	1	0.419	0.445	0.431	0.427	0.358	0.45	0.388	0.404	0.357	0.485	0.506	11	0.422	0.0449067	1.2934	0.0001	0.428	0.415	0.427	0.299	0.393	0.338	0.31	0.391	0.388	0.373	0.466	0.399	0.393	0.394	14	0.384	0.0443459
29	0.124	0.18	0.111	0.083	0.081	0.077	0.216	0.167	0.155	N.A.	0.112	0.108	11	0.122	0.0431601	1	0.087	0.043	0.058	0.035	0.059	0.027	0.037	0.09	0.079	N.A.	0.06	10	0.053	0.0211294	0.4382	0.0001	N.A.	0.057	0.044	N.A.	0.035	0.073	0.077	0.065	N.A.	0.075	0.072	0.085	N.A.	0.069	10	0.063	0.0139323
31	0.077	0.059	0.343	0.074	0.031	0.094	0.05	0.11	0.147	0.232	0.187	0.103	12	0.102	0.0859694	1	0.346	0.362	0.388	N.A.	0.228	0.24	0.336	0.276	0.279	N.A.	0.384	9	0.31	0.0574555	3.046	0.0001	0.161	0.126	0.156	N.A.	N.A.	0.067	0.169	0.131	0.198	0.192	0.151	0.149	0.095	0.125	12	0.138	0.0404679
32	0.29	0.348	0.31	0.201	0.236	0.266	0.334	0.256	0.243	0.266	0.302	0.217	12	0.269	0.0436052	1	0.196	0.185	0.197	0.225	0.173	0.219	0.249	0.192	0.186	0.226	0.183	11	0.202	0.0223681	0.7506	0.0001	0.29	0.218	0.201	0.217	0.2	0.244	0.183	0.207	0.183	0.22	0.18	0.234	0.222	0.247	14	0.216	0.022952
33	0.156	0.146	0.123	0.317	0.048	0.183	0.082	0.097	0.124	0.125	0.169	0.15	12	0.13	0.0637212	1	0.232	0.327	0.327	0.361	0.209	0.251	0.235	0.205	0.315	N.A.	0.385	10	0.278	0.062325	2.1304	0.0001	0.194	0.249	0.194	0.195	0.308	0.297	0.221	0.189	0.29	0.345	0.307	0.319	0.206	0.19	14	0.244	0.0572765
34	0.118	0.383	N.A.	0.473	0.444	0.412	0.32	0.349	0.241	0.225	0.212	N.A.	10	0.295	0.109426	1	0.148	0.187	0.171	0.163	0.064	0.093	0.071	0.118	0.188	0.141	0.112	11	0.125	0.0420395	0.4221	0.0001	0.086	0.059	0.136	0.131	0.064	0.131	0.063	N.A.	0.192	0.106	0.061	0.097	0.145	0.245	13	0.106	0.0566961
35	0.213	0.407	0.302	0.331	0.418	0.335	0.18	0.24	0.234	0.205	0.371	0.473	12	0.295	0.0915118	1	0.55	0.519	0.419	0.328	0.566	0.603	0.79	0.562	0.46	0.48	0.443	11	0.508	0.113923	1.7196	0.0001	0.407	0.503	0.478	0.431	0.544	0.294	0.522	0.287	0.316	0.536	0.317	0.668	0.344	0.524	14	0.426	0.124326
36	0.083	0.224	0.136	0.249	0.059	0.06	0.057	0.126	0.26	0.13	0.182	0.111	12	0.122	0.070328	1	0.053	0.061	0.065	0.067	0.066	0.03	0.024	0.047	0.058	0.046	0.047	11	0.049	0.0136721	0.4014	0.0001	0.097	0.049	0.049	0.075	0.033	0.051	0.067	0.042	0.055	0.053	0.083	0.037	0.089	0.086	14	0.059	0.0191786
37	0.264	0.338	0.266	0.244	0.227	0.275	0.217	0.216	0.212	0.18	0.221	0.215	12	0.237	0.0395168	1	0.164	0.193	0.168	0.18	0.211	0.138	0.175	0.157	0.105	0.1	0.168	11	0.156	0.0324414	0.661	0.0001	0.215	0.165	0.224	0.178	0.26	0.136	0.151	0.16	0.175	0.178	0.174	0.148	0.208	0.16	14	0.178	0.0324852
38	0.985	1.028	1.011	0.693	0.983	1.045	1.163	1.704	0.68	1.419	1.032	1.312	12	1.054	0.274386	1	N.A.	0.169	N.A.	0.226	N.A.	0.205	0.319	N.A.	N.A.	N.A.	N.A.	4	0.224	0.0554138	0.2123	0.0001	N.A.	N.A.	N.A.	N.A.	N.A.	N.A.	N.A.	N.A.	N.A.	N.A.	N.A.	N.A.	N.A.	N.A.	0	N.A.	N.A.
39	N.A.	N.A.	0.168	0.097	0.166	0.32	0.3	0.312	0.23	0.176	0.224	0.15	10	0.201	0.0722773	1	0.104	0.114	0.035	0.093	0.137	0.101	N.A.	0.04	0.065	0.076	0.024	10	0.069	0.0354696	0.3444	0.0002	N.A.	N.A.	N.A.	N.A.	N.A.	N.A.	N.A.	N.A.	N.A.	N.A.	N.A.	N.A.	N.A.	N.A.	0	N.A.	N.A.
40	0.496	0.454	0.571	0.463	0.476	0.68	0.436	0.465	0.465	0.432	0.442	0.436	12	0.48	0.0691175	1	0.66	0.627	0.596	0.518	0.719	0.757	N.A.	0.479	0.646	0.681	0.704	10	0.633	0.083088	1.3175	0.0002	0.465	0.651	0.781	0.608	0.921	0.47	0.671	0.493	0.702	0.668	0.454	0.541	0.536	0.556	14	0.596	0.128741
41	0.088	0.116	0.096	0.104	0.083	0.117	0.064	0.095	0.084	0.068	0.07	0.083	12	0.087	0.0167033	1	0.064	0.075	0.053	0.058	0.063	0.064	0.084	0.07	0.067	0.052	0.055	11	0.063	0.00928787	0.7243	0.0002	0.062	0.106	0.078	0.054	0.084	0.069	0.091	0.046	0.056	0.066	0.118	0.061	0.079	0.065	14	0.072	0.0194005
42	0.239	N.A.	0.327	0.338	0.214	0.241	0.376	0.246	0.361	0.341	0.174	0.258	11	0.276	0.0642394	1	0.088	0.157	0.146	N.A.	N.A.	0.176	N.A.	0.182	0.149	0.077	0.173	8	0.138	0.0372995	0.4992	0.0002	0.119	0.152	N.A.	0.11	0.117	0.153	0.122	0.173	0.139	N.A.	0.173	0.177	0.115	0.157	12	0.14	0.0250088
43	0.515	0.498	0.445	0.493	0.611	0.5	0.459	0.423	0.334	0.35	0.341	0.409	12	0.441	0.078852	1	0.409	0.341	0.353	0.338	0.316	0.326	0.337	0.304	0.348	0.226	0.308	11	0.325	0.0420645	0.7361	0.0002	0.308	0.307	0.254	0.332	0.323	0.49	0.411	0.326	0.28	0.457	0.306	0.409	0.295	0.441	14	0.346	0.0698192
44	0.553	0.679	0.676	0.713	0.493	0.7	0.75	0.51	0.544	0.557	0.514	0.561	12	0.598	0.0879098	1	0.36	0.358	0.392	0.647	0.459	0.439	0.493	0.308	0.371	0.432	0.512	11	0.425	0.0896702	0.7107	0.0003	0.489	0.717	0.593	0.399	0.563	0.485	0.5	0.429	0.457	0.344	0.503	0.41	0.497	0.424	14	0.479	0.0586025
45	0.633	0.439	0.402	0.505	0.437	0.444	0.338	0.365	0.354	0.279	0.275	0.36	12	0.392	0.0953567	1	0.315	0.303	0.343	0.272	0.197	0.247	0.156	0.289	0.266	0.273	0.175	11	0.251	0.0564717	0.6401	0.0003	0.322	0.197	0.256	0.217	0.126	0.225	0.21	0.246	0.276	N.A.	0.204	0.263	N.A.	0.347	12	0.234	0.0567851
46	0.357	0.276	0.202	0.063	0.315	N.A.	0.222	0.165	0.172	0.189	0.232	0.124	11	0.193	0.0801093	1	0.514	0.265	0.421	0.356	0.531	0.443	0.374	0.387	0.449	0.309	0.582	11	0.411	0.0916555	2.1321	0.0003	0.452	0.574	0.51	0.308	0.728	0.563	0.313	0.54	0.21	0.387	0.365	0.436	0.264	0.386	14	0.41	0.143451
47	0.768	0.622	0.46	0.68	0.669	0.68	0.59	0.46	0.524	0.4	0.339	0.606	12	0.552	0.124511	1	0.405	0.424	0.449	0.347	0.226	0.189	0.205	0.376	0.492	0.316	0.264	11	0.32	0.0989877	0.58	0.0003	0.475	0.292	0.288	0.456	0.398	0.386	0.395	0.291	0.368	0.489	0.264	0.315	0.345	0.46	14	0.366	0.0684886
48	0.487	0.414	0.467	0.348	0.376	0.452	0.481	0.34	0.422	0.464	0.472	0.441	12	0.427	0.0489921	1	0.395	0.364	0.31	0.363	0.318	0.326	0.313	0.383	0.331	0.216	0.325	11	0.327	0.0458577	0.7663	0.0003	0.228	0.298	0.268	0.136	0.3	0.402	0.215	0.334	0.291	0.404	0.319	0.294	0.374	0.356	14	0.291	0.0763762
49	0.08	0.266	0.104	0.213	0.3	0.182	0.128	0.148	0.15	0.113	0.195	0.103	12	0.153	0.0653807	1	0.096	0.111	0.074	0.15	0.081	0.052	0.051	0.047	0.109	0.062	0.059	11	0.076	0.0308382	0.4968	0.0003	0.073	0.053	0.1	0.043	0.079	0.072	0.056	0.044	0.085	0.087	0.146	0.053	0.135	0.102	14	0.075	0.0329324
50	0.185	0.194	0.238	0.175	0.325	0.315	0.329	0.311	0.352	0.337	0.268	0.327	12	0.272	0.0623209	1	0.323	0.349	0.363	0.437	0.381	0.378	0.486	0.456	N.A.	N.A.	0.518	9	0.405	0.0629364	1.4918	0.0004	0.405	0.491	0.448	0.334	0.444	0.374	N.A.	0.346	0.366	N.A.	0.279	N.A.	0.466	N.A.	10	0.39	0.0595524
51	2.298	2.612	3.041	1.764	3.129	3.037	2.001	2.202	2.076	1.177	3.012	1.641	12	2.244	0.612576	1	3.972	3.431	2.653	3.112	3.962	4.883	2.805	3.824	5.099	3.353	2.988	11	3.568	0.76412	1.5901	0.0004	3.337	3.218	4.142	3.526	3.583	3.104	4.991	4.281	4.051	3.668	3.657	4.027	4.939	4.646	14	3.898	0.58561
52	0.339	0.496	0.762	0.64	0.813	0.86	0.987	0.939	0.826	0.793	0.775	1.004	12	0.74	0.187493	1	0.431	0.495	0.495	0.428	0.368	0.531	0.456	0.599	0.512	0.383	0.528	11	0.47	0.0659951	0.6355	0.0004	0.427	0.474	0.439	0.47	0.511	0.397	0.235	0.458	0.46	0.564	0.505	0.465	0.578	0.391	14	0.447	0.0898426
53	0.362	0.345	0.272	0.395	0.518	0.421	0.353	0.32	0.294	0.342	0.368	0.316	12	0.354	0.0620455	1	0.512	0.647	0.604	0.363	0.407	0.524	0.571	0.516	0.536	0.34	0.608	11	0.502	0.0967333	1.4173	0.0004	0.366	0.437	0.682	0.376	0.461	0.452	0.507	0.223	0.645	0.639	0.311	0.353	0.539	0.409	14	0.438	0.125171
54	0.209	N.A.	0.261	0.183	0.175	0.334	0.231	0.233	0.191	N.A.	0.215	0.185	10	0.218	0.0453256	1	0.338	0.247	0.299	0.299	0.377	0.382	0.327	0.255	0.281	0.253	0.331	11	0.305	0.0451995	1.4006	0.0004	0.262	0.319	0.427	0.258	0.377	0.396	0.323	0.256	0.37	0.414	0.206	0.258	0.246	0.343	14	0.311	0.0678706
55	N.A.	0.274	0.233	0.45	0.377	0.325	0.233	0.329	0.36	0.405	0.299	0.335	11	0.322	0.0647308	1	0.274	0.289	0.288	0.125	0.153	0.126	N.A.	0.182	0.128	0.184	0.111	10	0.174	0.0679529	0.5408	0.0004	0.146	0.095	0.209	0.159	0.121	0.214	0.176	0.153	0.247	0.237	0.204	0.313	N.A.	0.223	13	0.183	0.052511
56	0.113	0.149	0.098	N.A.	0.068	0.14	0.296	0.186	0.277	0.277	0.182	0.218	11	0.166	0.0738694	1	0.112	0.088	0.095	0.084	0.085	0.04	0.078	0.111	0.098	0.036	0.071	11	0.077	0.0237994	0.4648	0.0005	0.056	0.102	0.072	0.045	0.074	0.119	0.087	0.105	0.062	0.13	0.102	0.099	N.A.	0.127	13	0.087	0.0266158
57	0.277	0.265	0.187	0.204	0.198	0.233	0.304	0.197	0.198	0.19	0.202	0.198	12	0.218	0.0376773	1	0.209	0.187	0.175	0.088	0.158	0.104	0.118	0.165	0.16	0.082	0.108	11	0.135	0.040897	0.6188	0.0005	0.07	0.158	0.058	N.A.	0.11	0.176	0.126	0.136	0.071	0.182	0.128	0.28	0.075	0.139	13	0.12	0.057315
58	0.252	0.143	0.18	0.137	0.204	0.158	0.297	0.139	0.183	0.11	N.A.	0.118	11	0.167	0.0549947	1	0.154	0.034	0.131	0.098	0.091	0.077	0.045	0.113	0.112	0.066	0.056	11	0.081	0.0355498	0.4854	0.0005	0.082	0.045	0.044	0.075	0.058	0.175	0.196	N.A.	0.055	0.09	0.074	0.079	0.028	0.033	13	0.068	0.0531678
59	0.38	0.536	0.454	0.296	0.707	0.499	0.535	0.484	0.455	0.441	0.451	0.459	12	0.466	0.0938511	1	0.487	0.619	0.669	0.653	0.544	0.704	0.758	0.703	0.674	0.495	0.766	11	0.636	0.0924558	1.3658	0.0006	0.722	0.692	0.615	0.707	0.659	0.658	0.511	0.595	0.683	0.63	0.796	0.583	0.812	0.69	14	0.663	0.0842753
60	0.133	0.112	0.079	0.128	0.109	0.118	0.104	0.095	0.085	0.071	0.038	0.077	12	0.091	0.0260228	1	0.052	0.064	0.073	0.033	0.03	N.A.	0.021	0.049	0.068	0.058	0.022	10	0.043	0.0182811	0.4687	0.0006	0.073	0.039	0.04	0.043	N.A.	0.027	0.057	N.A.	N.A.	0.052	0.036	0.044	N.A.	0.055	10	0.045	0.0100204
61	0.24	0.239	0.232	0.247	0.235	0.262	0.193	0.289	0.3	0.142	0.327	0.31	12	0.246	0.0494677	1	0.18	0.208	0.176	0.199	0.119	0.154	0.198	0.16	0.18	0.108	0.21	11	0.168	0.0325604	0.6853	0.0006	0.169	0.269	0.191	0.132	0.246	0.182	0.144	0.131	0.187	0.186	0.175	0.141	0.209	0.156	14	0.176	0.0339199
62	0.194	0.108	0.15	0.251	0.222	0.177	0.137	0.124	0.167	0.108	0.115	0.12	12	0.15	0.045086	1	0.257	0.226	0.265	0.141	0.215	0.241	0.418	0.249	0.286	0.229	0.189	11	0.239	0.0657923	1.5922	0.0006	0.242	0.197	0.28	0.249	0.295	0.289	0.247	0.14	0.285	0.307	0.157	0.205	0.184	0.258	14	0.232	0.0552611
63	0.061	0.052	0.08	0.019	N.A.	0.026	0.072	0.111	0.064	0.166	0.101	0.126	11	0.068	0.0415776	1	0.199	0.146	0.26	0.126	0.292	0.185	0.097	0.172	0.18	0.143	0.18	11	0.172	0.0537029	2.548	0.0007	0.171	0.208	0.167	0.144	0.168	0.161	0.11	0.214	0.142	0.267	0.142	0.152	0.069	0.168	14	0.156	0.0487991
64	N.A.	0.119	0.224	N.A.	0.109	0.135	0.171	0.188	N.A.	N.A.	0.2	0.197	8	0.163	0.0393397	1	0.122	0.061	0.091	0.047	N.A.	N.A.	N.A.	N.A.	0.086	0.108	0.06	7	0.078	0.0254189	0.4796	0.0008	0.079	0.077	0.088	0.107	0.088	0.123	0.099	0.164	0.096	0.094	0.203	0.117	0.179	0.141	14	0.113	0.0368019
65	0.127	0.365	N.A.	N.A.	0.463	N.A.	0.269	0.265	0.228	0.159	0.321	N.A.	8	0.255	0.10202	1	0.152	0.142	0.129	0.164	0.074	0.07	0.077	0.124	0.181	0.135	0.095	11	0.116	0.0363429	0.4564	0.0008	0.11	0.116	0.161	0.078	0.091	0.193	0.104	0.082	0.055	N.A.	N.A.	N.A.	N.A.	0.044	10	0.095	0.0452196
66	0.057	0.073	0.101	0.117	0.131	0.091	0.078	0.109	0.073	0.065	0.093	0.065	12	0.085	0.0221778	1	0.145	0.137	0.119	0.105	0.096	0.112	0.116	0.126	0.104	0.121	0.153	11	0.12	0.0169496	1.4109	0.001	0.167	0.122	0.082	0.043	0.111	0.12	0.086	0.112	0.11	0.112	0.13	0.089	0.138	0.103	14	0.105	0.024426
67	0.815	1.007	0.779	0.697	0.855	0.873	0.632	0.76	0.655	0.428	0.684	0.739	12	0.729	0.138686	1	0.276	0.495	0.498	0.593	0.486	0.6	0.494	0.66	0.64	0.392	0.527	11	0.502	0.106311	0.6881	0.001	0.4	0.48	0.481	0.573	0.597	0.427	0.542	0.536	0.58	0.391	0.61	0.456	0.578	0.617	14	0.513	0.0739521
68	0.937	N.A.	0.637	0.876	0.821	0.855	0.767	0.735	0.619	0.494	0.615	0.711	11	0.722	0.127776	1	0.402	0.627	0.548	0.64	0.267	0.37	0.195	0.64	0.512	0.425	0.39	11	0.43	0.143977	0.5955	0.0011	0.706	0.309	0.381	0.302	0.183	0.325	0.421	N.A.	0.306	0.44	0.189	0.214	0.22	0.257	13	0.305	0.0863227
69	0.363	0.22	0.158	0.243	0.264	0.297	0.197	0.165	0.155	0.277	0.155	0.174	12	0.214	0.0645437	1	0.193	0.181	0.218	0.133	0.096	0.099	0.081	0.128	0.15	0.136	0.091	11	0.13	0.0429343	0.6101	0.0011	0.124	0.137	0.105	0.086	0.067	0.086	0.114	0.166	0.126	0.169	0.196	0.145	0.186	0.167	14	0.128	0.0420637
70	0.301	0.464	0.184	0.588	0.526	0.67	0.276	0.268	0.279	0.256	0.22	0.223	12	0.325	0.155945	1	0.132	0.346	0.292	0.263	0.056	0.023	0.035	0.041	0.14	0.06	0.09	11	0.094	0.109068	0.2883	0.0011	0.107	N.A.	0.107	0.121	0.079	0.23	N.A.	0.089	0.227	0.111	0.108	0.124	0.256	0.213	12	0.136	0.0638448
71	0.227	0.194	0.212	0.193	0.173	0.2	0.222	0.132	0.158	0.126	0.145	0.193	12	0.178	0.0327748	1	0.174	0.144	0.148	0.119	0.172	0.081	0.113	0.139	0.128	0.102	0.103	11	0.126	0.0280009	0.7086	0.0012	0.103	0.196	0.109	0.111	0.159	0.236	0.104	0.125	0.103	0.216	0.132	0.125	0.127	0.137	14	0.136	0.0420385
73	0.136	0.119	0.085	0.094	0.114	0.113	0.104	0.089	0.077	0.106	0.104	0.097	12	0.102	0.0155179	1	0.051	0.065	0.064	0.093	0.045	0.095	0.07	0.058	0.063	0.061	0.124	11	0.069	0.0220705	0.6751	0.0013	0.088	0.054	0.147	0.076	0.101	0.06	0.053	0.101	0.068	0.06	0.065	0.079	0.109	0.059	14	0.076	0.0187343
74	0.121	0.067	0.128	0.214	0.083	0.073	0.076	0.061	0.091	0.068	0.066	0.081	12	0.088	0.0414597	1	0.176	0.177	0.089	0.214	0.126	0.212	0.169	0.111	0.099	0.166	0.138	11	0.147	0.0409642	1.6736	0.0013	0.174	0.113	0.145	0.139	0.133	0.168	0.174	0.093	0.201	0.244	0.147	0.151	0.245	0.105	14	0.153	0.0476832
75	0.03	0.04	0.092	0.048	0.026	0.02	0.061	0.067	0.076	0.083	0.108	0.165	12	0.057	0.0393912	1	0.145	0.142	0.109	0.117	0.128	0.085	0.111	0.131	0.152	0.117	0.137	11	0.124	0.0185544	2.159	0.0013	0.082	0.178	0.117	0.035	0.156	0.174	0.089	0.125	0.132	0.291	0.141	0.143	0.086	0.144	14	0.123	0.0610645
76	0.092	0.057	0.115	0.092	0.086	0.165	0.101	0.093	0.081	0.124	0.07	N.A.	11	0.094	0.0277286	1	0.076	0.065	0.079	0.05	0.029	0.036	0.022	0.095	0.064	0.047	0.026	11	0.048	0.0230232	0.5121	0.0013	N.A.	N.A.	N.A.	N.A.	N.A.	N.A.	N.A.	N.A.	N.A.	N.A.	N.A.	N.A.	N.A.	N.A.	0	N.A.	N.A.
77	0.166	0.186	0.133	0.045	0.075	0.194	0.11	0.156	0.212	0.24	0.198	0.235	12	0.148	0.0589216	1	0.308	0.266	0.28	0.221	0.253	0.291	0.321	0.242	0.26	0.404	0.211	11	0.274	0.051279	1.8484	0.0014	0.248	0.256	0.444	0.155	0.371	0.231	0.3	0.255	0.287	0.174	0.253	0.279	0.269	0.311	14	0.265	0.0579751
78	0.122	0.066	0.061	0.092	0.132	0.104	0.13	0.104	0.097	0.064	0.062	0.075	12	0.089	0.025601	1	0.054	0.07	0.094	0.038	0.044	N.A.	N.A.	0.049	0.067	0.041	0.031	9	0.051	0.0185699	0.5776	0.0015	0.077	0.056	0.043	0.067	0.037	0.039	0.031	N.A.	0.039	0.045	0.048	0.04	0.089	0.048	13	0.048	0.0163893
79	0.15	0.482	0.35	N.A.	N.A.	N.A.	0.375	0.358	0.364	N.A.	0.112	0.117	8	0.252	0.131807	1	0.545	0.679	0.753	0.546	0.967	0.888	N.A.	0.684	0.497	0.751	0.765	10	0.693	0.143301	2.7518	0.0015	0.783	0.713	0.693	0.903	0.716	0.721	0.496	0.683	0.648	0.729	0.458	0.625	0.686	0.657	14	0.671	0.113057
80	0.494	0.794	0.75	1.019	0.753	0.834	0.703	0.737	0.705	0.757	0.569	0.572	12	0.712	0.131539	1	0.379	0.459	0.376	0.66	0.593	0.529	0.56	0.427	N.A.	0.637	0.626	10	0.514	0.102132	0.7222	0.0015	0.694	0.522	0.596	0.234	0.686	0.703	0.584	N.A.	0.507	0.473	0.658	0.35	0.59	0.459	13	0.522	0.143418
81	0.382	0.271	0.251	0.385	0.364	0.25	0.296	0.262	0.282	0.215	0.21	0.275	12	0.282	0.057349	1	0.232	0.236	0.271	0.173	0.127	0.141	0.16	0.191	0.301	0.184	0.198	11	0.195	0.0513669	0.6923	0.0016	0.246	0.144	0.103	0.221	0.144	0.229	0.175	0.157	0.193	0.265	0.12	0.183	0.13	0.23	14	0.175	0.0442379
82	1.248	1.742	1.788	1.621	1.614	2.009	1.862	1.604	1.622	1.586	1.477	1.172	12	1.595	0.226059	1	1.137	1.099	1.087	1.224	1.241	1.778	1.544	1.143	1.23	1.294	1.329	11	1.269	0.19923	0.7952	0.0016	1.366	1.282	1.35	1.96	1.465	1.704	1.539	1.259	1.37	1.677	1.13	1.572	1.25	1.577	14	1.449	0.228191
83	0.301	0.526	0.25	0.112	0.263	0.249	0.377	0.279	0.257	0.198	0.316	0.211	12	0.262	0.097474	1	0.169	0.164	0.144	0.221	0.222	0.201	0.109	0.173	0.157	0.144	0.146	11	0.165	0.0331575	0.6298	0.0017	0.12	0.176	0.16	0.221	0.114	0.237	0.159	0.25	0.126	0.251	0.169	0.173	0.143	0.16	14	0.17	0.0471698
84	N.A.	1.542	1.391	1.186	1.199	1.498	1.538	1.293	1.477	1.059	1.13	1.083	11	1.297	0.178504	1	0.782	0.801	0.994	1.005	1.197	1.36	1.116	0.842	0.778	1.15	1.092	11	0.994	0.184149	0.7667	0.0017	1.074	1.075	0.733	1.28	1.025	1.12	0.845	0.939	1.027	1.039	0.918	1.358	1.16	1.083	14	1.036	0.145691
85	0.347	0.22	0.424	0.275	0.545	0.372	0.612	0.353	0.248	0.223	0.44	0.403	12	0.354	0.117931	1	0.445	0.467	0.506	0.472	0.631	0.645	0.489	0.512	0.573	0.484	0.593	11	0.525	0.0663898	1.4841	0.0018	0.484	0.602	0.585	0.615	0.55	0.477	0.515	0.5	0.554	0.578	0.58	0.485	0.585	0.538	14	0.544	0.0427344
86	0.809	0.749	0.987	0.63	0.809	1.11	0.742	1.121	0.69	0.974	0.728	0.676	12	0.821	0.162537	1	0.636	0.578	0.441	0.708	0.548	0.778	0.542	0.823	0.662	0.414	0.645	11	0.603	0.122061	0.7354	0.0019	0.51	0.661	0.449	0.247	0.533	0.55	0.781	0.812	0.678	0.487	0.935	0.443	1.061	0.785	14	0.6	0.226774
87	0.475	0.313	0.225	0.257	0.241	0.267	0.207	0.324	0.383	0.295	0.27	0.294	12	0.288	0.0705413	1	0.182	0.216	0.214	0.211	0.216	0.276	0.259	0.253	0.203	0.19	0.197	11	0.218	0.028693	0.7558	0.002	0.215	0.23	0.238	0.199	0.246	0.205	0.224	0.245	0.254	0.268	0.229	0.227	0.265	0.251	14	0.235	0.0216852
88	0.179	0.207	0.155	0.117	0.142	0.115	0.245	0.218	0.17	0.2	0.143	0.159	12	0.166	0.0386907	1	0.274	0.186	0.239	0.181	0.335	0.207	N.A.	0.261	0.299	N.A.	0.207	9	0.238	0.050095	1.4322	0.002	0.233	0.267	0.285	0.535	0.189	0.314	0.274	0.279	0.434	0.326	0.182	0.23	0.218	0.219	14	0.272	0.103875
89	0.618	0.414	0.659	0.617	0.686	0.779	0.48	0.567	0.534	0.502	0.52	0.4	12	0.554	0.107624	1	0.651	0.658	0.608	0.822	0.814	1.005	0.747	0.601	0.635	0.685	0.828	11	0.723	0.1187	1.3046	0.0021	0.686	0.83	0.807	0.717	0.837	0.787	0.645	0.789	0.808	0.833	0.582	0.596	0.65	0.805	14	0.735	0.0924997
90	0.065	0.082	0.11	0.156	0.034	0.071	0.041	0.075	0.09	0.13	0.133	0.149	12	0.086	0.0389836	1	0.169	0.154	0.167	0.124	0.115	0.159	0.127	0.14	0.195	0.148	0.179	11	0.151	0.0235116	1.762	0.0022	0.141	0.176	0.145	N.A.	0.222	0.15	0.133	0.137	0.153	0.203	0.179	0.11	0.114	0.107	13	0.148	0.0374695
91	0.497	N.A.	0.566	0.874	0.723	0.697	0.525	0.541	0.584	0.604	N.A.	0.489	10	0.6	0.114925	1	0.199	0.305	0.189	N.A.	0.479	0.281	0.376	0.327	N.A.	0.628	0.466	9	0.337	0.13457	0.5613	0.0022	0.518	N.A.	0.452	0.143	0.763	0.543	N.A.	0.548	0.442	0.392	0.511	0.301	0.405	0.448	12	0.427	0.155515
92	N.A.	0.25	0.078	0.059	0.066	0.054	0.06	0.081	0.064	0.047	N.A.	N.A.	9	0.073	0.0594362	1	0.162	0.122	0.125	0.162	0.143	0.215	0.095	0.161	0.185	0.135	0.152	11	0.148	0.0309935	2.0182	0.0023	0.142	0.149	0.093	0.179	0.149	0.178	0.235	0.142	N.A.	0.196	0.159	0.164	N.A.	0.227	12	0.163	0.0308905
93	0.119	0.166	0.232	0.191	0.126	0.129	0.271	0.217	0.196	0.242	0.202	0.232	12	0.187	0.0474192	1	0.138	0.148	0.167	0.18	0.092	0.096	0.204	0.106	0.099	0.089	0.089	11	0.122	0.039529	0.6519	0.0024	0.115	0.093	0.076	0.113	0.096	0.156	0.071	0.143	0.061	0.119	0.088	0.279	0.092	0.131	14	0.108	0.0567823
94	0.282	0.248	0.183	0.133	0.18	0.198	0.173	0.261	0.19	0.247	0.112	0.175	12	0.192	0.0494225	1	0.14	0.149	0.071	0.124	0.112	0.05	0.08	0.17	0.205	0.057	0.139	11	0.108	0.0469322	0.5611	0.0024	0.068	0.17	0.116	0.305	0.154	0.127	0.275	0.172	0.115	0.099	0.215	0.109	0.198	0.14	14	0.15	0.0651688
95	0.2	0.167	0.14	0.067	N.A.	0.186	0.262	0.115	0.196	0.211	0.219	0.203	11	0.169	0.0514977	1	0.317	0.303	0.212	0.161	0.224	0.29	0.326	0.329	0.253	0.358	0.311	11	0.274	0.0573732	1.6166	0.0024	0.211	0.318	0.301	0.259	0.192	0.375	0.311	0.294	0.393	0.332	0.195	0.304	0.229	0.202	14	0.272	0.0676372
96	0.176	0.164	0.213	0.088	0.164	0.242	0.201	0.154	0.158	0.134	0.239	0.137	12	0.167	0.0431055	1	0.227	0.165	0.257	0.273	0.299	0.239	0.376	0.162	0.212	0.247	0.36	11	0.248	0.0657951	1.4873	0.0025	0.229	0.303	0.231	0.287	N.A.	0.252	0.248	0.251	0.249	N.A.	0.194	0.178	0.198	0.244	12	0.236	0.033287
97	0.555	0.54	0.601	0.441	0.7	0.768	0.521	0.677	0.484	0.492	0.374	0.423	12	0.536	0.114156	1	0.373	0.404	0.392	0.39	0.551	0.454	0.45	0.407	0.426	0.392	0.381	11	0.417	0.0485012	0.7782	0.0025	0.28	0.35	0.426	0.526	0.414	0.344	0.458	0.54	0.525	0.392	0.481	0.387	0.477	0.419	14	0.423	0.0618397
98	0.215	0.179	0.228	0.07	0.528	0.163	0.335	0.367	0.241	0.217	0.458	0.166	12	0.233	0.127175	1	0.757	0.244	0.328	0.284	0.99	1.002	0.794	0.379	0.539	0.442	N.A.	10	0.511	0.273548	2.1941	0.0026	0.298	0.607	0.881	0.458	0.871	0.461	0.252	0.338	0.341	0.952	0.313	0.69	0.259	0.458	14	0.463	0.231228
99	0.366	0.362	0.57	0.619	0.599	0.652	0.393	0.623	0.513	0.505	0.52	0.464	12	0.506	0.0977032	1	0.436	0.333	0.215	0.517	0.278	0.321	0.256	0.46	0.469	0.376	0.368	11	0.354	0.0919526	0.7004	0.0027	0.361	0.362	0.297	0.291	0.286	0.433	0.348	0.329	0.412	0.407	0.524	0.383	0.129	0.315	14	0.334	0.0969679
100	0.127	0.137	0.107	0.057	N.A.	0.119	0.204	0.188	0.158	0.264	0.156	0.224	11	0.147	0.0558701	1	0.297	0.208	0.326	0.173	0.237	0.192	0.264	0.273	0.196	0.326	0.264	11	0.245	0.0511866	1.6658	0.0027	0.209	0.236	0.242	0.382	0.186	0.222	0.21	0.253	0.312	0.369	0.171	0.19	0.203	0.164	14	0.231	0.07426
101	0.153	0.176	0.204	0.308	0.172	0.301	0.13	0.152	0.146	0.181	0.149	0.137	12	0.177	0.0573447	1	0.138	0.146	0.175	0.087	0.118	0.136	0.122	0.1	0.105	0.106	0.161	11	0.124	0.0259057	0.7016	0.0029	0.158	0.263	0.117	0.147	0.141	0.084	0.11	0.132	0.163	0.145	0.181	0.128	0.13	0.138	14	0.141	0.0242715
102	0.218	0.32	0.301	0.201	0.316	0.38	0.523	0.416	0.396	0.374	0.435	0.422	12	0.347	0.0882709	1	0.448	0.568	0.608	0.331	0.455	0.44	0.902	0.638	0.549	0.354	0.637	11	0.519	0.153594	1.4966	0.0029	0.567	0.575	0.41	0.64	0.479	0.468	0.332	0.529	0.407	0.462	0.607	0.648	0.332	0.416	14	0.48	0.106988
103	0.134	0.1	0.09	0.033	0.067	0.061	0.201	0.094	0.134	0.18	0.152	0.18	12	0.106	0.0508229	1	0.21	0.162	0.31	0.153	0.118	0.244	0.229	0.175	0.178	0.159	0.323	11	0.197	0.0624753	1.8561	0.003	0.346	0.456	0.164	0.158	0.325	0.412	0.139	0.249	0.148	0.329	0.143	0.196	0.099	0.254	14	0.221	0.0945847
104	0.519	0.534	0.519	0.549	0.587	0.587	0.351	0.427	0.4	0.35	0.426	0.424	12	0.465	0.0825572	1	0.647	0.685	0.536	0.529	1.21	0.819	0.637	0.535	0.587	0.574	0.516	11	0.64	0.193228	1.3751	0.003	0.732	0.551	0.789	0.622	0.713	0.449	0.654	0.713	0.691	0.692	0.453	0.491	0.686	0.653	14	0.626	0.09904
105	0.592	0.416	0.367	0.349	0.599	0.673	0.618	0.335	0.381	0.664	0.209	0.442	12	0.446	0.145913	1	0.35	0.266	0.191	0.223	0.207	0.165	0.193	N.A.	0.601	0.339	0.264	10	0.26	0.122134	0.5828	0.0031	0.169	0.138	0.103	0.435	0.178	0.452	0.347	0.192	0.16	0.352	0.332	0.518	0.272	0.398	14	0.258	0.113243
106	0.298	0.371	0.311	0.213	0.198	0.255	0.371	0.26	0.288	0.259	0.378	0.549	12	0.301	0.0912026	1	0.224	0.239	0.249	0.325	0.163	0.158	0.178	0.235	0.194	0.139	0.248	11	0.208	0.0512797	0.6906	0.0031	0.199	0.22	0.22	0.22	0.213	0.292	0.235	0.226	0.186	0.223	0.24	0.263	0.183	0.265	14	0.226	0.0314191
107	0.169	0.403	N.A.	0.301	0.356	N.A.	0.247	0.253	0.192	0.144	0.262	0.112	10	0.228	0.0878868	1	0.183	0.175	0.166	0.162	0.079	0.083	0.097	0.144	0.196	0.132	0.081	11	0.129	0.0422004	0.5664	0.0031	0.139	0.053	0.125	0.09	0.087	0.146	0.089	0.093	0.216	0.116	0.149	0.101	0.294	0.274	14	0.126	0.0729749
108	0.915	0.874	0.764	0.557	0.581	0.759	0.881	0.931	0.787	0.881	0.791	0.8	12	0.784	0.115	1	0.578	0.639	0.665	0.629	0.682	0.743	0.704	0.666	0.58	0.705	0.59	11	0.651	0.0524436	0.8297	0.0031	0.62	0.71	0.637	0.692	0.595	0.771	0.69	0.643	0.723	0.704	0.621	0.639	0.74	0.674	14	0.674	0.050748
109	0.64	0.605	0.708	0.391	0.357	0.781	0.492	0.526	0.602	0.416	0.5	0.498	12	0.529	0.122881	1	0.372	0.459	0.296	0.543	0.415	0.514	0.373	0.3	0.312	0.432	0.368	11	0.391	0.0793432	0.7388	0.0038	0.717	0.429	0.415	0.355	0.468	0.373	0.333	0.395	0.436	0.415	0.352	0.371	0.499	0.36	14	0.414	0.0502638
110	2.12	2.137	2.972	2.958	2.385	3.14	3.096	2.797	2.531	2.423	2.312	2.611	12	2.6	0.347191	1	1.074	1.727	0.968	1.416	3.001	2.412	1.915	2.001	1.963	2.295	1.689	11	1.771	0.563015	0.6809	0.0038	3.498	1.58	1.885	2.106	2.32	2.172	2.536	1.487	2.272	2.48	1.695	1.57	2.351	3.051	14	2.149	0.439573
111	0.244	0.274	0.249	0.331	0.305	0.296	0.102	0.257	0.268	0.179	0.208	0.2	12	0.234	0.060046	1	0.158	0.152	0.212	0.133	0.182	0.197	0.174	0.179	0.141	0.064	0.149	11	0.152	0.03763	0.6519	0.0042	0.176	0.118	0.148	0.24	0.134	0.123	0.147	0.156	0.17	0.124	0.134	0.2	0.21	0.174	14	0.157	0.0366211
112	N.A.	0.733	0.66	0.891	0.747	0.778	0.508	0.577	0.606	0.676	0.558	0.488	11	0.646	0.118016	1	0.283	0.355	0.261	0.543	0.621	0.414	0.516	0.338	N.A.	0.671	0.527	10	0.432	0.135428	0.6687	0.0044	0.627	0.457	0.563	0.203	0.803	0.693	0.483	N.A.	0.515	0.464	0.577	0.329	0.504	0.444	13	0.488	0.16043
113	0.122	0.506	0.122	0.192	0.268	0.222	0.152	0.174	0.154	0.143	0.148	0.158	12	0.18	0.101514	1	0.098	0.106	0.099	0.197	0.116	0.046	0.053	0.116	0.164	0.097	0.141	11	0.104	0.0418492	0.5753	0.0046	0.11	0.08	0.258	0.044	0.161	0.159	0.092	0.083	0.124	0.128	0.19	0.076	0.149	0.133	14	0.117	0.0415869
114	0.136	0.087	0.119	0.125	0.122	0.126	0.157	0.126	0.105	0.117	0.057	0.116	12	0.113	0.0238937	1	0.128	0.067	0.108	0.083	0.076	0.054	0.086	0.08	0.092	0.071	0.078	11	0.082	0.0191997	0.7239	0.0046	0.088	0.08	0.043	0.103	0.12	0.113	0.056	0.057	0.058	0.107	0.077	0.071	0.078	0.12	14	0.08	0.0245841
115	0.184	0.145	0.32	0.164	0.11	0.125	0.213	0.22	0.198	0.257	0.347	0.315	12	0.204	0.0753276	1	0.347	0.299	0.315	0.263	0.609	0.303	N.A.	0.195	0.259	0.357	0.414	10	0.322	0.107337	1.5803	0.0048	N.A.	0.342	0.305	0.27	0.347	0.438	0.345	0.243	0.35	0.388	0.326	0.237	0.231	0.227	13	0.305	0.0683974
116	0.238	0.292	0.272	0.144	0.22	0.18	0.333	0.249	0.283	0.268	0.256	0.284	12	0.246	0.0490688	1	0.209	0.225	0.196	0.196	0.146	0.146	0.145	0.201	0.191	0.062	0.166	11	0.163	0.0434235	0.6641	0.0048	0.123	0.206	0.163	0.071	0.172	0.324	0.106	0.16	0.164	0.237	0.199	0.178	0.137	0.245	14	0.167	0.0663912
117	0.232	0.294	0.281	0.123	0.183	0.112	0.449	0.286	0.333	0.307	0.445	0.456	12	0.266	0.113086	1	0.445	0.419	0.433	0.358	0.506	0.49	0.526	0.308	0.338	0.526	0.476	11	0.432	0.0726076	1.6223	0.005	0.495	0.474	0.365	0.51	0.359	0.585	0.17	0.348	0.278	0.407	0.297	0.334	0.161	0.458	14	0.352	0.125008
118	0.238	0.14	0.187	N.A.	0.17	0.167	0.257	0.164	0.193	0.175	0.199	0.198	11	0.187	0.0320307	1	0.259	0.21	0.289	0.275	0.22	0.179	0.263	0.238	0.253	0.219	0.187	11	0.233	0.0340462	1.2456	0.0053	0.276	0.175	0.146	0.332	0.338	0.299	0.133	0.207	0.21	0.234	0.256	0.224	0.145	0.289	14	0.223	0.0652929
119	0.218	0.259	0.234	0.168	0.314	0.327	0.192	0.217	0.23	0.202	0.248	0.219	12	0.232	0.0445034	1	0.296	0.302	0.269	0.21	0.316	0.364	0.301	0.3	0.312	0.284	0.241	11	0.288	0.0385094	1.2424	0.0058	0.331	0.207	0.291	0.319	0.298	0.281	0.233	0.347	0.302	0.292	0.253	0.312	0.247	0.336	14	0.286	0.034861
120	0.203	0.181	0.156	0.129	0.206	0.244	0.157	0.163	0.16	0.11	0.166	0.131	12	0.163	0.0356109	1	0.259	0.22	0.224	0.206	0.311	0.258	0.173	0.153	0.176	0.198	0.23	11	0.215	0.043341	1.3142	0.0059	0.217	0.208	0.269	0.206	0.217	0.181	0.209	0.227	0.239	0.24	0.166	0.202	0.234	0.188	14	0.213	0.023349
121	0.121	0.167	0.147	0.091	0.091	0.105	0.166	0.106	0.107	0.164	0.123	0.119	12	0.123	0.0272319	1	0.118	0.094	0.094	0.087	0.09	0.035	0.061	0.127	0.111	0.046	0.065	11	0.079	0.0281434	0.643	0.0059	0.043	0.12	0.069	0.035	0.088	0.131	0.106	0.098	0.027	0.133	0.103	0.105	0.081	0.105	14	0.081	0.0323391
122	0.111	0.094	0.057	0.044	0.072	0.048	0.097	0.092	0.106	0.137	0.14	0.106	12	0.086	0.0302435	1	0.115	0.123	0.142	0.221	0.124	0.097	0.105	0.118	0.12	0.146	0.141	11	0.129	0.0316601	1.4924	0.0061	0.148	0.167	0.132	0.086	0.077	0.086	0.097	0.189	0.121	0.083	0.109	0.126	0.065	0.069	14	0.105	0.0337345
123	0.411	0.249	0.405	0.381	0.396	0.432	0.5	0.303	0.255	0.375	0.209	0.391	12	0.348	0.0825202	1	0.334	0.218	0.331	0.243	0.242	0.311	0.288	0.236	0.249	0.274	0.211	11	0.264	0.0415976	0.7573	0.0062	0.268	0.225	0.18	0.362	0.356	0.255	0.217	0.269	0.27	0.292	0.266	0.35	0.128	0.365	14	0.262	0.069188
124	0.288	0.191	0.177	0.272	0.211	0.255	0.2	0.195	0.249	0.146	0.109	0.137	12	0.195	0.0533862	1	0.161	0.15	0.243	0.129	0.056	0.1	0.088	0.157	0.167	0.119	0.071	11	0.121	0.0504164	0.6221	0.0065	0.247	0.12	0.128	0.209	0.067	0.071	0.177	0.1	0.167	0.264	0.111	0.186	0.128	0.088	14	0.135	0.0600445
125	N.A.	0.17	0.165	N.A.	0.332	0.094	0.355	0.291	0.156	0.268	0.315	0.234	10	0.221	0.0834218	1	0.156	0.115	0.109	N.A.	0.142	0.127	0.146	0.237	0.141	0.082	0.125	10	0.133	0.0387427	0.6033	0.0065	0.203	0.07	0.169	N.A.	0.108	0.111	N.A.	N.A.	0.238	0.09	0.285	N.A.	0.175	0.246	10	0.154	0.072514
126	0.145	0.106	0.174	0.137	0.264	0.257	0.072	0.209	0.242	0.194	0.193	0.279	12	0.177	0.0626103	1	0.254	0.284	0.237	0.317	0.22	0.189	0.247	0.239	0.333	0.32	0.34	11	0.267	0.0482992	1.5051	0.0066	0.293	0.308	0.206	0.146	0.331	0.349	0.116	0.282	0.276	0.413	0.267	0.275	0.116	0.209	14	0.24	0.0923788
127	0.122	0.121	0.107	0.146	0.112	0.135	0.112	0.105	0.098	0.092	0.064	0.201	12	0.114	0.0320688	1	0.104	0.127	0.11	0.075	0.076	0.041	0.071	0.071	0.078	0.058	0.089	11	0.078	0.0232411	0.6888	0.0066	0.093	0.07	0.123	0.059	0.124	0.053	0.069	0.085	0.083	0.115	0.11	0.072	0.221	0.081	14	0.091	0.0447018
128	0.068	0.132	0.103	0.136	0.097	0.129	0.067	0.133	0.108	0.082	0.084	0.123	12	0.102	0.0245521	1	0.067	0.094	0.071	0.073	0.059	0.093	0.102	0.076	0.085	0.071	0.075	11	0.078	0.0124979	0.7617	0.0072	0.099	0.068	0.093	0.089	0.101	0.06	0.068	0.062	0.09	0.08	0.074	0.06	0.079	0.079	14	0.077	0.0127804
129	0.588	0.756	0.684	0.976	0.601	0.977	0.927	0.738	0.625	0.528	0.669	0.641	12	0.712	0.148115	1	0.454	0.519	0.515	0.464	0.609	0.763	0.793	0.49	0.529	0.565	0.561	11	0.56	0.107449	0.7872	0.0076	0.519	0.468	0.587	0.77	0.727	0.459	0.59	0.463	0.615	0.612	0.469	0.533	0.638	0.634	14	0.57	0.0989314
130	0.953	0.951	1.105	0.761	0.931	1.187	0.991	0.877	N.A.	0.712	0.812	0.872	11	0.913	0.133823	1	0.641	0.662	0.69	0.696	0.834	0.858	1.058	0.738	0.732	0.794	0.726	11	0.759	0.112731	0.8309	0.0079	0.849	0.651	0.74	0.852	0.836	0.653	0.759	0.752	0.744	0.571	0.662	0.801	0.992	0.882	14	0.76	0.11275
131	0.141	0.249	0.261	N.A.	0.196	N.A.	N.A.	N.A.	0.336	N.A.	0.238	N.A.	6	0.229	0.0597478	1	0.338	0.44	0.326	0.408	N.A.	0.363	0.479	0.342	0.349	N.A.	0.342	9	0.373	0.0504227	1.6312	0.0079	0.531	0.395	0.399	0.265	0.463	N.A.	0.242	0.323	0.34	0.356	0.294	0.323	0.478	0.425	13	0.363	0.0764126
132	0.426	0.411	0.457	0.157	0.487	0.425	0.651	0.531	0.515	0.443	0.572	0.293	12	0.425	0.122703	1	0.321	0.256	0.267	0.323	0.46	0.354	0.232	0.317	0.293	0.265	0.229	11	0.296	0.0630388	0.6961	0.009	0.201	0.292	0.333	0.357	0.227	0.333	0.292	0.429	0.284	0.321	0.316	0.325	0.284	0.341	14	0.305	0.0485386
133	0.632	0.564	0.921	0.786	0.865	0.926	1.194	1.141	0.788	0.974	0.593	0.545	12	0.801	0.208096	1	0.732	0.581	0.654	0.45	0.891	0.626	0.6	0.646	0.652	0.418	0.46	11	0.596	0.129686	0.7445	0.0091	0.352	0.46	0.435	0.594	0.576	0.553	0.695	0.81	0.59	0.825	0.712	0.706	0.669	0.728	14	0.606	0.0877351
134	0.182	0.38	0.148	0.251	0.396	0.254	0.145	0.153	0.174	0.162	0.168	0.169	12	0.202	0.0846265	1	0.13	0.135	0.121	0.344	0.119	0.077	0.095	0.116	0.145	0.124	0.147	11	0.131	0.067033	0.6479	0.0095	0.144	0.113	0.195	0.097	0.164	0.188	0.127	0.119	0.146	0.136	0.226	0.094	0.283	0.146	14	0.148	0.0541403
135	0.257	0.352	0.3	0.254	0.514	0.368	0.44	0.354	0.474	0.287	0.381	0.422	12	0.358	0.0804989	1	0.398	0.427	0.375	0.439	0.711	0.54	0.617	0.45	0.469	0.35	0.46	11	0.466	0.102742	1.3014	0.0096	0.449	0.407	0.359	0.529	0.364	0.53	0.501	0.478	0.447	0.537	0.465	0.388	0.442	0.587	14	0.458	0.063753
136	0.163	0.098	0.126	0.054	N.A.	0.11	0.233	0.186	0.19	0.208	0.235	0.166	11	0.149	0.0552742	1	0.227	0.221	0.314	0.238	0.235	0.19	0.279	0.301	0.239	0.127	0.263	11	0.233	0.04961	1.5654	0.01	0.227	0.261	0.257	0.197	0.198	0.231	0.219	0.299	0.213	0.206	0.219	0.293	0.206	0.213	14	0.229	0.0339762
137	0.56	0.546	0.455	0.493	0.451	0.472	0.425	0.383	0.328	0.284	0.327	0.342	12	0.413	0.0859872	1	0.318	0.341	0.388	0.401	0.316	0.278	0.254	0.306	0.326	0.415	0.335	11	0.331	0.0476527	0.8012	0.01	0.343	0.391	0.359	0.55	0.343	0.335	0.364	0.321	0.401	0.214	0.27	0.388	0.346	0.417	14	0.353	0.0819457
138	0.19	0.36	0.233	0.155	0.189	0.32	0.135	0.21	0.109	0.104	0.269	0.249	12	0.196	0.0769514	1	0.358	0.227	0.21	0.558	0.331	0.364	0.343	0.177	0.258	0.38	0.263	11	0.3	0.101053	1.5327	0.0102	0.403	0.386	0.5	0.219	0.343	0.216	0.13	0.266	0.361	0.254	0.251	0.303	0.348	0.373	14	0.296	0.0715661
139	0.331	0.336	0.29	0.301	0.417	0.36	0.334	0.466	0.341	0.265	0.413	0.315	12	0.343	0.0557367	1	0.164	0.219	N.A.	0.264	0.444	0.276	0.157	0.321	0.314	0.177	0.22	10	0.243	0.0840038	0.7078	0.0107	0.165	0.23	0.2	0.218	0.17	0.214	0.147	0.256	0.293	N.A.	0.19	0.31	0.313	0.3	13	0.225	0.0583874
140	0.394	0.422	0.391	0.445	0.357	0.443	0.395	0.422	0.378	0.304	0.331	0.349	12	0.384	0.0423428	1	0.453	0.388	0.468	0.425	0.442	0.556	0.388	0.436	0.39	0.416	0.575	11	0.445	0.0606837	1.1602	0.0108	0.501	0.436	0.51	0.423	0.512	0.408	0.444	0.472	0.48	0.467	0.41	0.439	0.481	0.472	14	0.46	0.0314876
141	0.169	0.183	N.A.	N.A.	N.A.	N.A.	N.A.	N.A.	N.A.	N.A.	N.A.	0.142	3	0.164	0.0170163	1	0.153	0.14	0.135	0.14	0.163	0.097	0.066	0.115	0.113	0.06	0.08	11	0.109	0.0335426	0.6676	0.0109	0.091	0.121	0.11	0.177	0.083	N.A.	0.246	0.189	0.117	0.148	0.12	0.191	0.064	0.134	13	0.129	0.0521391
142	0.08	0.049	0.047	0.037	0.036	0.039	0.059	0.085	0.134	0.131	0.146	0.115	12	0.07	0.0398745	1	0.194	0.15	0.127	0.117	0.146	0.076	0.059	0.127	0.138	0.138	0.093	11	0.118	0.0356867	1.6834	0.011	N.A.	0.135	0.079	0.106	0.108	0.143	0.144	0.131	0.047	0.074	0.141	0.199	0.116	0.071	13	0.108	0.0404121
143	0.066	0.043	0.084	0.006	0.047	0.021	0.131	0.059	0.106	N.A.	0.153	0.106	11	0.057	0.0437391	1	0.15	0.129	0.191	0.093	0.17	0.109	0.104	0.17	0.167	0.133	0.114	11	0.136	0.0309441	2.3906	0.0112	0.062	0.091	0.074	0.099	0.044	0.069	N.A.	0.135	0.096	N.A.	0.055	0.104	0.028	0.149	12	0.076	0.0384971
144	1.929	1.992	2.158	1.758	1.745	2.024	1.899	1.979	1.405	1.284	1.503	1.443	12	1.737	0.273425	1	1.163	1.055	1.033	1.346	1.35	1.751	1.91	1.481	1.409	1.691	1.478	11	1.399	0.267909	0.8052	0.0113	1.616	1.349	1.568	1.703	1.729	1.304	1.833	1.338	1.747	1.22	1.293	1.513	2.086	1.677	14	1.552	0.260334
145	0.052	0.027	N.A.	0.116	N.A.	0.08	0.102	N.A.	0.042	0.078	0.06	0.044	9	0.061	0.027776	1	0.1	0.048	0.131	0.114	0.085	0.182	N.A.	0.166	0.15	0.07	0.111	10	0.108	0.0402767	1.7723	0.0122	0.052	0.061	0.106	0.088	0.083	0.064	0.162	0.05	0.061	0.076	0.103	0.044	0.1	0.055	14	0.074	0.0318758
146	0.094	0.127	0.102	0.077	0.275	0.227	0.062	0.062	0.149	0.094	0.149	0.134	12	0.117	0.0623222	1	0.118	0.115	0.051	0.072	0.03	0.035	N.A.	0.092	0.1	0.069	0.049	10	0.066	0.030412	0.5668	0.0123	0.059	0.03	0.056	0.05	0.03	0.037	0.049	0.052	0.083	0.142	0.071	0.086	0.016	0.1	14	0.054	0.0343973
147	1.27	0.807	1.019	1.043	1.046	1.399	1.261	0.759	1.171	0.843	1.057	1.114	12	1.049	0.186667	1	0.864	0.967	0.878	0.835	0.877	0.95	0.915	0.924	0.572	1.027	0.758	11	0.861	0.116041	0.8205	0.0123	0.819	0.894	0.485	1.155	0.677	1.882	0.527	0.896	0.618	1.053	1.038	0.994	0.831	1.009	14	0.869	0.345144
148	0.261	0.579	0.504	0.607	0.282	0.481	0.23	0.284	0.522	0.527	0.543	0.631	12	0.429	0.140646	1	0.477	0.6	0.598	0.64	0.758	0.557	0.669	0.537	0.639	0.651	0.486	11	0.596	0.0794189	1.3894	0.0125	0.789	0.609	0.723	0.428	0.832	0.804	0.517	0.54	0.637	0.81	0.755	0.513	0.606	0.701	14	0.649	0.133488
149	0.238	0.239	0.106	0.038	0.062	0.108	0.031	0.113	0.155	0.149	0.08	0.163	12	0.104	0.0657337	1	0.193	0.187	0.166	0.155	0.268	0.129	0.35	0.19	0.166	0.293	0.11	11	0.19	0.0697818	1.8177	0.0126	0.164	0.135	0.146	0.103	N.A.	0.13	0.191	0.15	0.14	N.A.	0.152	0.165	0.125	0.158	12	0.145	0.0239537
150	0.302	0.243	0.213	0.313	0.319	0.279	0.218	0.201	0.204	0.135	0.172	0.19	12	0.226	0.0565928	1	0.192	0.255	0.222	0.181	0.145	0.13	0.079	0.145	0.193	0.186	0.101	11	0.158	0.0495967	0.7011	0.0127	0.211	0.128	0.157	0.122	0.05	0.108	0.165	0.16	0.187	0.159	0.125	0.17	0.13	0.199	14	0.141	0.0400427
151	0.328	0.222	0.163	0.182	0.177	0.198	0.271	0.195	0.208	0.183	0.098	0.157	12	0.191	0.0553316	1	0.195	0.124	0.142	0.129	0.122	0.125	0.167	0.157	0.196	0.107	0.143	11	0.144	0.0282825	0.7518	0.0127	0.096	0.168	0.118	0.158	0.117	0.138	0.131	0.127	0.102	0.17	0.129	0.166	0.235	0.133	14	0.138	0.0342796
153	0.11	0.104	0.164	0.2	0.167	0.222	0.121	0.053	0.126	0.12	0.217	0.117	12	0.134	0.0488782	1	0.188	0.191	0.163	0.304	0.409	0.291	0.304	0.134	0.102	0.264	0.175	11	0.213	0.0875249	1.5848	0.0131	0.34	0.131	0.268	0.159	0.182	0.194	0.192	0.227	0.239	0.304	0.195	0.278	N.A.	0.207	13	0.217	0.0426569
154	0.293	0.127	0.145	0.171	0.188	0.211	0.168	0.229	0.213	0.107	0.079	0.118	12	0.161	0.0576558	1	0.11	0.14	0.137	0.108	0.092	0.151	0.107	0.117	0.133	0.104	0.093	11	0.116	0.0189226	0.7197	0.0132	0.146	0.145	0.12	0.173	0.172	0.13	0.125	0.091	0.109	0.149	0.131	0.094	0.13	0.112	14	0.128	0.0262231
155	0.119	0.165	0.145	0.063	N.A.	0.155	0.105	0.157	0.161	0.176	0.186	0.178	11	0.141	0.0351756	1	0.191	0.159	0.201	0.178	0.132	0.191	N.A.	0.218	0.211	0.327	0.199	10	0.196	0.0484996	1.3915	0.0138	0.192	0.231	0.229	0.436	0.195	0.216	0.214	0.229	0.25	0.19	0.151	0.201	0.191	0.206	14	0.217	0.070747
157	0.785	0.56	0.659	0.666	0.657	0.681	0.595	0.762	0.622	0.76	0.693	0.62	12	0.668	0.0666087	1	0.481	0.607	0.498	0.675	0.626	0.638	0.545	0.67	0.562	0.502	0.68	11	0.585	0.071674	0.8753	0.014	0.48	0.419	0.634	0.725	0.885	0.503	N.A.	0.631	0.728	0.548	0.719	0.48	0.668	0.711	13	0.612	0.116642
158	0.167	0.088	0.137	0.168	0.024	0.129	0.104	0.157	0.153	0.208	0.231	0.311	12	0.136	0.0698026	1	0.246	0.26	0.297	0.172	0.168	0.242	0.257	0.195	0.192	0.311	0.325	11	0.236	0.0525047	1.7375	0.014	0.22	0.238	0.18	0.167	0.302	0.229	0.175	0.162	0.174	0.184	0.204	0.206	0.135	0.121	14	0.188	0.0467543
159	0.614	0.304	0.515	0.777	0.292	0.546	0.615	0.648	0.669	0.853	0.801	0.919	12	0.596	0.188685	1	0.843	0.977	0.971	0.605	0.705	0.829	0.703	0.815	0.707	0.923	1.238	11	0.831	0.168242	1.3952	0.0142	0.466	0.415	0.617	0.657	0.732	0.59	0.564	0.731	0.728	0.648	0.612	0.803	0.682	0.509	14	0.616	0.0826573
160	0.439	0.358	0.315	0.3	0.263	0.302	0.506	0.149	0.358	0.341	0.254	0.258	12	0.307	0.0882819	1	0.301	0.244	0.209	0.089	0.18	0.186	0.172	0.377	0.314	0.168	0.184	11	0.206	0.0780225	0.6706	0.0143	0.154	0.222	0.227	0.174	0.242	0.309	0.218	0.286	0.236	0.293	0.297	0.199	0.21	0.345	14	0.238	0.0511722
161	0.231	0.158	0.155	0.173	0.176	0.17	0.144	0.124	0.141	0.106	0.143	0.108	12	0.149	0.0325665	1	0.147	0.139	0.151	0.144	0.105	0.07	0.083	0.099	0.147	0.103	0.105	11	0.114	0.027533	0.7652	0.0157	0.133	0.089	0.142	0.082	0.07	0.093	0.139	0.116	0.142	0.124	0.16	0.108	0.13	0.123	14	0.115	0.0257682
162	0.782	0.76	0.635	0.724	0.917	0.936	0.784	0.575	0.567	0.5	0.58	0.653	12	0.689	0.133814	1	0.55	0.639	0.556	0.721	0.557	0.452	0.347	0.574	0.731	0.466	0.564	11	0.549	0.107707	0.7969	0.0158	0.675	0.404	0.591	0.367	0.512	0.608	0.407	0.447	0.636	0.576	0.48	0.533	0.842	0.548	14	0.532	0.123244
163	0.134	0.06	0.095	0.095	0.141	0.1	0.296	0.086	0.101	0.066	0.053	0.057	12	0.095	0.0630648	1	0.07	0.05	0.076	0.056	0.044	N.A.	0.069	0.063	0.097	0.034	0.073	10	0.061	0.0171161	0.6416	0.0162	0.072	0.057	0.055	0.048	0.061	0.205	0.058	0.063	0.043	0.069	0.077	0.072	0.074	0.042	14	0.065	0.0430704
164	0.123	0.149	0.257	0.225	0.178	0.13	0.202	0.182	0.211	0.262	0.302	0.323	12	0.203	0.0618372	1	0.236	0.297	0.302	0.287	0.374	0.224	0.197	0.225	0.282	0.242	0.383	11	0.271	0.0576933	1.3379	0.0164	0.32	0.315	0.377	0.111	0.386	0.408	0.262	0.356	0.303	0.311	0.347	0.277	0.267	0.267	14	0.296	0.0765178
165	0.395	0.556	0.516	0.513	0.582	0.535	0.432	0.474	0.364	0.394	0.365	0.443	12	0.458	0.0727787	1	0.297	0.373	0.351	0.33	0.39	0.522	0.403	0.429	0.43	0.328	0.423	11	0.384	0.0600668	0.8381	0.0164	0.441	0.334	0.414	0.354	0.455	0.305	0.411	0.421	0.446	0.38	0.428	0.379	0.461	0.486	14	0.405	0.0505809
166	0.436	0.594	0.451	0.53	0.588	0.688	0.511	0.447	0.3	0.33	0.461	0.561	12	0.479	0.106266	1	0.29	0.418	0.38	0.44	0.322	0.474	0.451	0.338	0.322	0.331	0.492	11	0.381	0.0673558	0.7956	0.0179	0.328	0.328	0.341	0.499	0.358	0.417	0.326	0.414	0.32	0.326	0.386	0.439	0.528	0.459	14	0.385	0.0677648
167	0.128	0.167	0.138	0.098	0.101	0.161	0.395	0.445	0.309	0.335	N.A.	0.136	11	0.19	0.120593	1	0.166	0.147	0.136	0.106	0.148	0.07	0.101	0.13	0.125	0.088	0.096	11	0.116	0.0280625	0.61	0.0179	0.062	0.143	0.111	0.226	0.117	0.162	0.179	0.135	0.117	0.049	0.13	0.136	0.124	0.144	14	0.123	0.0416838
168	0.439	0.503	0.6	0.769	0.488	0.649	0.634	0.727	0.621	0.568	0.57	0.687	12	0.597	0.0938984	1	0.504	0.632	0.722	0.748	0.676	0.788	0.745	0.7	0.709	0.69	0.919	11	0.705	0.0966281	1.1813	0.0187	0.598	0.658	0.771	0.641	1.037	0.673	0.603	0.74	0.6	0.683	0.728	0.698	0.818	0.699	14	0.703	0.116537
169	0.169	0.256	0.15	0.094	0.105	0.086	0.079	0.133	0.066	0.158	0.236	0.186	12	0.131	0.058762	1	0.115	0.164	0.078	0.094	0.041	0.046	0.042	0.106	0.132	0.042	0.111	11	0.079	0.0400388	0.5999	0.0191	0.051	0.12	0.084	0.125	N.A.	0.061	0.166	0.133	0.159	0.066	0.144	0.185	0.129	0.105	13	0.11	0.0384735
170	0.338	0.576	N.A.	N.A.	N.A.	N.A.	0.484	0.517	N.A.	N.A.	0.392	0.418	6	0.447	0.0799467	1	0.308	0.362	0.387	0.372	0.335	0.329	0.346	0.405	0.351	0.251	0.371	11	0.345	0.0400136	0.7707	0.0207	0.3	0.441	0.306	N.A.	0.421	N.A.	0.397	0.423	0.309	N.A.	0.358	N.A.	0.402	0.487	10	0.379	0.0515415
171	0.287	1.141	0.727	0.919	0.92	1.052	0.666	0.458	0.789	0.722	0.585	0.68	12	0.703	0.231472	1	0.407	0.65	0.461	0.915	0.435	0.562	0.457	0.329	0.524	0.452	0.515	11	0.501	0.148711	0.7123	0.0214	0.604	0.368	0.818	0.194	0.71	0.781	0.169	0.462	0.731	0.43	0.791	0.335	0.692	0.476	14	0.487	0.21922
172	0.518	0.507	0.572	0.545	0.504	0.648	0.529	0.601	0.526	0.636	0.557	0.463	12	0.548	0.0530181	1	0.424	0.439	0.383	0.598	0.482	0.576	0.359	0.475	0.483	0.471	0.582	11	0.473	0.0753924	0.8638	0.0218	0.435	0.481	0.462	0.392	0.47	0.587	0.623	0.567	0.514	0.368	0.524	0.452	0.539	0.507	14	0.489	0.0748653
173	N.A.	0.773	1.069	0.895	0.774	0.885	1.132	1.241	0.886	1.088	0.711	0.728	11	0.91	0.171765	1	0.702	0.736	0.541	0.808	0.728	0.734	0.763	1.163	0.776	0.742	0.65	11	0.747	0.144906	0.8203	0.022	0.904	0.838	0.363	0.279	0.535	0.499	N.A.	0.944	0.988	0.678	1.23	0.399	1.62	1.44	13	0.723	0.435141
174	0.136	0.187	0.18	0.233	0.349	0.308	0.186	0.206	0.212	0.125	0.153	0.125	12	0.19	0.066742	1	0.243	0.25	0.245	0.208	0.238	0.274	0.2	0.27	0.264	0.258	0.265	11	0.246	0.023025	1.2927	0.0223	0.352	0.211	0.227	0.227	0.23	0.203	0.173	0.2	0.254	0.244	0.198	0.211	0.252	0.223	14	0.226	0.0240732
175	0.457	0.507	0.336	0.347	0.226	0.415	0.501	0.354	0.425	0.399	0.437	0.427	12	0.395	0.0747579	1	0.382	0.419	0.577	0.435	0.462	0.46	0.525	0.518	0.495	0.42	0.616	11	0.478	0.0682219	1.2113	0.0225	0.612	0.528	0.464	0.616	0.393	0.533	0.495	0.549	0.592	N.A.	0.464	0.485	0.558	0.477	13	0.517	0.062987
176	0.19	0.425	0.334	0.253	0.694	0.585	0.357	0.366	0.306	0.286	0.359	0.311	12	0.351	0.134317	1	0.355	0.346	0.632	0.452	0.369	0.686	0.425	0.765	0.603	0.337	0.87	11	0.502	0.179809	1.4294	0.0228	0.682	0.418	0.417	0.675	0.436	0.698	0.356	0.703	0.691	0.705	0.47	0.765	0.744	0.49	14	0.571	0.137156
177	0.299	0.246	0.184	0.29	0.291	0.247	0.24	0.19	0.25	0.174	0.137	0.258	12	0.228	0.0493589	1	0.181	0.21	0.234	0.124	0.073	N.A.	N.A.	0.155	0.258	0.14	0.091	9	0.151	0.0596256	0.662	0.0229	0.2	0.095	0.068	0.213	0.105	0.203	0.151	0.083	0.117	0.23	0.099	0.148	0.052	0.17	14	0.126	0.0546257
178	0.497	0.514	0.46	0.454	0.436	0.571	0.539	0.453	0.446	0.42	0.512	0.475	12	0.48	0.043521	1	0.561	0.397	0.429	0.404	0.505	0.466	0.28	0.356	0.41	0.331	0.422	11	0.408	0.0747679	0.8504	0.0241	0.362	0.473	0.372	0.622	0.626	0.433	0.422	0.397	0.368	0.498	0.413	0.365	0.315	0.453	14	0.429	0.0954257
179	0.093	0.171	0.176	0.238	0.118	0.195	0.13	0.174	0.187	0.15	0.12	0.129	12	0.152	0.0390494	1	0.134	0.141	0.12	0.132	0.08	0.088	0.142	0.105	0.11	0.146	0.138	11	0.119	0.0217229	0.7866	0.0243	0.131	0.109	0.073	N.A.	0.08	0.111	0.051	0.085	0.135	0.088	0.147	0.053	0.105	0.094	13	0.092	0.0295549
180	0.315	0.464	0.336	0.334	0.359	0.394	0.173	0.596	0.356	0.322	0.334	0.365	12	0.35	0.094873	1	0.266	0.262	0.283	0.244	0.31	0.339	0.308	0.281	0.322	0.171	0.275	11	0.274	0.0433046	0.7838	0.0244	0.188	0.249	0.402	0.279	0.343	0.196	0.368	0.321	0.362	0.342	0.301	0.284	0.474	0.311	14	0.307	0.065543
181	0.186	N.A.	0.359	0.182	0.149	0.271	0.507	0.104	N.A.	0.592	0.215	0.228	10	0.244	0.151227	1	0.185	0.164	0.192	0.105	0.1	0.165	0.156	0.219	0.139	0.168	0.121	11	0.152	0.0352209	0.6213	0.0253	0.127	0.179	0.141	0.081	0.136	0.199	0.144	0.184	0.159	0.16	0.144	0.2	0.156	0.158	14	0.151	0.0314913
182	0.133	0.132	0.177	0.446	0.181	0.281	0.145	0.244	0.21	0.183	0.177	0.194	12	0.196	0.0827199	1	0.281	0.343	0.288	0.231	0.118	0.3	N.A.	0.349	0.365	0.376	0.262	10	0.279	0.0730261	1.4196	0.0266	0.232	0.257	0.235	0.222	0.309	0.177	0.188	0.135	0.225	0.281	0.245	0.285	0.227	0.187	14	0.224	0.0499261
183	0.249	0.371	0.224	0.337	0.235	0.278	0.217	0.167	0.235	0.199	0.238	0.123	12	0.231	0.0643097	1	0.241	0.279	0.243	N.A.	0.095	0.152	0.135	0.125	0.136	N.A.	0.122	9	0.159	0.0622803	0.6909	0.0267	0.236	0.227	0.137	0.19	0.214	0.175	0.192	N.A.	N.A.	0.139	0.134	0.261	0.324	0.124	12	0.188	0.0611824
184	0.57	0.635	0.514	0.565	0.643	0.602	0.431	0.543	0.38	0.366	0.371	0.396	12	0.491	0.101981	1	0.669	0.474	0.804	0.581	0.565	0.818	1.127	0.397	0.492	0.959	0.581	11	0.648	0.213812	1.3199	0.0271	0.468	0.528	0.617	0.686	0.633	0.441	0.516	0.552	0.632	0.479	0.456	0.631	0.584	0.411	14	0.539	0.0884146
185	0.85	0.894	0.944	0.986	N.A.	0.865	0.918	0.834	0.729	0.562	0.521	0.655	11	0.781	0.149655	1	0.635	0.593	0.716	0.62	0.762	0.591	0.51	0.65	0.745	0.775	0.601	11	0.649	0.0804513	0.832	0.0273	0.724	0.584	0.583	0.782	0.557	0.815	0.765	0.653	0.631	0.865	0.578	0.726	0.822	0.824	14	0.7	0.102445
186	1.276	0.967	0.963	1.024	0.788	1.116	1.071	1.976	0.868	0.836	0.9	1.072	12	1.039	0.301873	1	0.695	0.754	0.828	0.795	1.038	0.937	0.871	0.868	0.953	0.681	1.043	11	0.852	0.118968	0.8199	0.0275	0.531	0.938	0.978	0.654	1.185	0.711	0.746	1.031	0.857	0.849	1.026	0.909	1.105	1.081	14	0.88	0.167241
187	0.227	0.172	0.143	0.045	0.108	0.131	0.093	0.214	0.229	0.119	0.228	0.161	12	0.143	0.057703	1	0.216	0.184	0.235	0.153	0.31	0.181	N.A.	0.262	0.257	0.167	0.168	10	0.208	0.0488304	1.4595	0.0277	0.189	0.181	0.19	0.391	0.111	0.183	0.256	0.288	0.231	0.14	0.153	0.238	0.164	0.174	14	0.196	0.0764224
188	0.068	0.085	0.047	0.066	0.289	0.066	0.044	0.039	0.138	0.104	0.107	0.107	12	0.082	0.0647898	1	0.045	0.085	0.042	0.039	0.043	N.A.	N.A.	0.061	0.046	0.082	0.046	9	0.052	0.01664	0.6346	0.0277	0.04	0.037	0.054	0.038	N.A.	0.036	0.077	0.046	N.A.	N.A.	0.046	0.076	N.A.	0.077	10	0.05	0.0177431
189	0.459	0.354	0.36	0.355	0.343	0.377	0.238	0.257	0.253	0.219	0.239	0.298	12	0.305	0.0700373	1	0.305	0.29	0.211	0.23	0.172	0.172	0.294	0.259	0.361	0.232	0.203	11	0.241	0.056845	0.7918	0.0277	0.34	0.248	0.291	0.167	0.09	0.305	0.16	0.251	0.29	0.206	0.298	0.243	0.312	0.246	14	0.234	0.0676574
190	0.595	0.379	0.353	0.503	0.455	0.444	0.331	0.571	0.404	N.A.	0.449	0.407	11	0.438	0.080225	1	0.177	0.311	N.A.	0.381	0.295	0.447	0.477	0.413	0.324	0.372	0.306	10	0.339	0.0824852	0.775	0.0283	0.319	0.292	0.361	0.392	0.296	0.38	0.364	0.372	0.422	0.307	0.342	0.415	0.487	0.347	14	0.36	0.0518169
191	0.391	0.331	0.224	0.14	0.288	0.185	0.395	0.341	0.235	0.238	0.351	0.157	12	0.259	0.0851782	1	0.324	0.113	0.183	0.212	0.296	0.131	0.148	0.207	0.209	0.119	0.203	11	0.185	0.0650063	0.7135	0.0305	0.093	0.302	0.208	0.111	0.181	0.412	0.209	0.274	0.124	0.295	0.206	0.277	0.13	0.181	14	0.197	0.0859036
192	0.305	0.391	0.421	0.249	0.335	0.457	0.556	0.438	0.352	0.507	0.491	0.389	12	0.398	0.0851797	1	0.268	0.425	0.348	0.411	0.35	0.355	0.324	0.4	0.249	0.227	0.195	11	0.314	0.0741969	0.7886	0.0314	0.265	0.263	0.405	0.112	0.414	0.403	0.146	0.204	0.328	0.429	0.274	0.213	0.344	0.417	14	0.28	0.110022
193	1.225	2.191	1.353	1.54	0.964	1.437	1.341	1.226	1.63	1.23	1.536	1.215	12	1.38	0.293997	1	0.467	1.223	1.059	0.875	1.607	1.336	1.096	1.011	1.474	1.085	0.829	11	1.048	0.301845	0.7593	0.0315	0.991	1.402	1.087	1.534	1.084	1.205	1.236	0.902	1.114	0.887	0.905	1.014	1.417	1.169	14	1.123	0.200302
194	0.179	0.216	0.259	0.33	0.282	0.296	0.087	0.198	0.224	0.243	0.148	0.225	12	0.213	0.0636926	1	0.124	0.172	0.192	0.209	N.A.	0.101	0.122	0.152	0.193	N.A.	0.18	9	0.156	0.0354968	0.7349	0.0322	0.154	0.097	0.097	0.11	0.101	0.158	0.101	0.141	0.152	0.15	0.179	0.112	N.A.	0.177	13	0.13	0.0285463
195	N.A.	0.586	0.84	0.529	0.974	0.764	0.939	1.268	0.857	0.834	0.54	0.63	11	0.77	0.211385	1	0.447	0.399	0.359	0.624	1.031	0.441	0.412	0.831	0.894	0.618	0.514	11	0.562	0.216646	0.7301	0.0325	0.381	0.475	0.373	0.266	0.426	0.723	0.582	0.548	0.715	0.517	0.555	0.634	0.815	0.454	14	0.512	0.147313
196	0.26	0.188	0.127	0.201	0.175	0.207	0.14	0.145	0.133	0.186	0.095	0.12	12	0.159	0.044321	1	0.111	0.103	0.147	0.167	0.107	0.084	0.11	0.228	0.122	0.1	0.109	11	0.121	0.0388957	0.7638	0.0326	0.115	0.13	0.122	0.071	0.059	0.094	0.154	0.114	0.169	0.174	0.124	0.141	0.15	0.365	14	0.129	0.0779147
197	0.077	0.04	0.036	N.A.	N.A.	0.019	0.062	0.047	0.112	0.088	0.064	0.026	10	0.05	0.0277397	1	0.148	0.161	0.078	0.064	0.05	N.A.	0.03	0.108	0.138	0.221	0.07	10	0.091	0.056384	1.8214	0.035	N.A.	0.116	0.065	0.039	0.064	0.047	0.125	0.067	0.02	0.043	0.123	0.137	0.079	0.048	13	0.066	0.0376684
198	0.608	0.591	0.442	0.584	N.A.	0.67	0.483	0.389	0.51	0.253	0.364	0.373	11	0.462	0.121608	1	0.42	0.482	0.452	0.32	0.306	0.261	0.173	0.405	0.431	0.444	0.254	11	0.344	0.096096	0.7447	0.0351	0.409	0.303	0.32	0.316	0.192	N.A.	0.28	0.272	0.325	0.333	0.309	0.302	0.311	0.356	13	0.306	0.0426127
199	0.048	0.076	0.074	0.042	0.044	0.055	0.098	0.086	0.094	0.111	0.101	0.08	12	0.072	0.0226977	1	0.053	0.049	0.051	N.A.	0.04	0.014	N.A.	0.078	0.067	N.A.	0.026	8	0.042	0.0193504	0.585	0.036	N.A.	0.03	0.037	N.A.	N.A.	0.06	N.A.	0.042	0.021	0.057	0.048	0.074	N.A.	0.031	9	0.042	0.0167063
200	0.173	0.136	0.131	0.069	0.081	0.105	0.088	0.303	0.242	0.32	0.198	0.219	12	0.153	0.0817837	1	0.205	0.249	0.285	0.166	0.154	0.196	0.249	0.293	0.234	0.239	0.219	11	0.222	0.0420327	1.452	0.036	0.247	0.225	0.192	0.403	0.167	0.207	0.263	0.2	0.255	0.199	0.195	0.224	0.21	0.184	14	0.221	0.0615932
201	0.9	0.493	0.406	0.479	0.492	0.599	0.39	0.395	0.445	0.279	0.412	0.336	12	0.449	0.151977	1	0.357	0.457	0.354	0.43	0.342	0.257	0.217	0.348	0.444	0.466	0.144	11	0.329	0.0995183	0.7328	0.037	0.385	0.238	0.361	0.661	0.209	0.691	0.265	0.366	0.326	0.574	0.213	0.288	0.294	0.34	14	0.346	0.166254
202	0.383	0.175	0.15	0.29	0.21	0.335	0.277	0.195	0.173	0.095	0.16	0.201	12	0.206	0.080305	1	0.155	0.231	0.227	0.099	N.A.	N.A.	N.A.	0.092	0.101	0.174	0.074	8	0.133	0.0580483	0.6446	0.0371	0.108	0.075	0.055	0.125	0.042	0.089	0.134	0.096	0.132	N.A.	0.053	0.149	0.082	N.A.	12	0.089	0.0353389
203	1.558	1.424	1.639	1.775	N.A.	1.245	1.425	1.075	1.381	1.076	1.056	1.334	11	1.344	0.226868	1	1.006	1.169	1.165	1.169	1.438	1.061	1.01	1.324	1.116	1.408	0.952	11	1.155	0.155734	0.8599	0.0371	1.203	1.316	1.441	1.208	1.007	1.466	1.307	1.248	1.151	1.507	1.226	1.02	1.216	1.239	14	1.246	0.147445
204	0.373	0.466	0.414	0.609	0.486	0.58	0.474	0.502	0.507	0.482	0.36	0.422	12	0.467	0.0713518	1	0.384	0.385	0.359	0.427	0.439	0.383	0.427	0.312	N.A.	0.538	0.436	10	0.405	0.0571874	0.8666	0.0387	0.399	0.323	0.456	0.232	0.515	0.448	0.257	0.412	0.436	0.404	0.494	0.243	0.415	0.349	14	0.373	0.0946343
205	0.316	0.327	0.371	0.379	0.45	0.489	0.261	0.442	0.199	0.499	0.269	0.497	12	0.361	0.0976366	1	0.212	0.221	0.184	0.3	0.25	0.26	0.411	0.247	0.436	0.344	0.3	11	0.278	0.077134	0.771	0.0396	0.243	0.233	0.369	0.24	0.285	0.341	0.298	0.201	0.197	0.226	0.262	0.358	0.329	0.201	14	0.264	0.0563535
206	0.13	0.28	0.177	0.267	0.061	0.174	0.056	0.031	0.156	0.245	0.208	0.262	12	0.142	0.083215	1	0.181	0.22	0.19	0.304	0.325	0.164	0.273	0.163	0.335	0.309	0.216	11	0.235	0.0637556	1.6623	0.0397	0.343	0.312	0.336	0.096	0.464	0.379	0.199	0.245	0.196	0.289	0.413	0.249	0.231	0.247	14	0.268	0.101849
207	0.267	0.245	0.225	0.233	0.326	0.327	0.182	0.175	0.186	0.145	0.178	0.189	12	0.216	0.0566919	1	0.175	0.187	0.159	0.224	0.15	0.175	0.2	0.219	0.2	0.112	0.168	11	0.176	0.030828	0.8134	0.0408	0.253	0.189	0.256	0.179	0.229	0.24	0.202	0.174	0.19	0.173	0.174	0.16	0.151	0.212	14	0.196	0.026949
208	0.193	0.208	0.136	0.05	0.127	0.16	0.133	0.122	0.252	0.282	0.113	0.223	12	0.153	0.0634671	1	0.146	0.131	0.12	0.119	0.101	0.079	0.123	0.123	0.119	0.09	0.083	11	0.11	0.020126	0.7222	0.0428	0.12	0.108	0.115	0.11	0.106	0.18	0.129	0.142	0.093	0.05	0.168	0.098	0.128	0.125	14	0.115	0.0343242
209	0.349	0.195	0.237	0.168	0.3	0.221	0.339	0.37	0.277	0.35	0.359	0.266	12	0.278	0.0663117	1	0.36	0.328	0.33	0.283	0.529	0.27	0.419	0.348	0.347	0.271	0.334	11	0.341	0.0707734	1.2277	0.0455	0.27	0.377	0.331	0.345	0.309	0.284	0.111	0.367	0.337	0.4	0.288	0.316	0.272	0.295	14	0.297	0.0707734
210	0.137	0.041	0.09	0.009	0.005	0.051	0.141	0.072	0.098	0.131	0.122	0.112	12	0.06	0.0462556	1	0.129	0.111	0.145	0.102	0.126	0.082	0.139	0.132	0.137	0.096	0.184	11	0.123	0.026451	2.0522	0.0458	0.16	0.079	0.09	0.074	0.115	0.1	N.A.	0.15	0.088	0.161	0.109	0.098	0.089	0.086	13	0.104	0.0267918
211	0.202	0.146	0.134	0.066	0.085	0.094	0.177	0.153	0.172	0.2	0.227	0.201	12	0.145	0.0494758	1	0.183	0.229	0.202	0.189	0.191	0.194	0.15	0.165	0.177	0.189	0.225	11	0.189	0.0220548	1.3	0.0459	0.159	0.268	0.224	0.326	0.252	0.1	0.259	0.214	0.178	0.129	0.216	0.199	0.208	0.2	14	0.201	0.0583925
212	0.234	0.331	0.161	0.335	0.184	0.195	0.107	0.1	0.148	0.118	0.222	0.111	12	0.172	0.0779154	1	0.125	0.141	0.139	0.27	0.141	0.128	0.14	0.08	0.087	0.094	0.089	11	0.123	0.0498876	0.7135	0.0463	0.242	0.082	0.125	0.151	0.087	0.094	0.096	0.113	0.113	0.187	0.116	0.141	0.316	0.103	14	0.129	0.0629017
213	0.597	0.512	0.645	0.812	0.572	0.745	0.686	0.77	0.762	0.671	0.749	0.615	12	0.672	0.0882846	1	0.615	0.683	0.614	0.742	0.416	0.506	0.598	0.569	0.621	0.657	0.521	11	0.588	0.0856824	0.875	0.0464	0.52	0.428	0.516	0.355	0.35	0.432	0.606	0.375	0.615	0.505	0.829	0.709	0.737	0.678	14	0.527	0.160858
214	0.39	0.511	0.307	0.433	0.362	0.484	0.28	0.404	0.385	0.403	0.288	0.365	12	0.378	0.0683939	1	0.392	0.457	0.455	0.459	0.466	0.54	0.519	0.35	0.313	0.478	0.488	11	0.442	0.0657364	1.1678	0.0479	0.406	0.428	0.49	0.346	0.513	0.359	0.471	0.416	0.441	0.389	0.438	0.37	0.487	0.433	14	0.425	0.0515037
215	N.A.	0.102	0.083	N.A.	0.073	0.055	N.A.	0.049	0.063	0.055	N.A.	0.032	8	0.061	0.0203039	1	0.099	0.073	0.085	0.085	0.071	0.063	0.072	0.104	0.141	0.067	0.082	11	0.084	0.0213511	1.3733	0.048	0.066	0.041	N.A.	0.122	0.051	0.09	0.119	0.068	0.041	0.107	0.085	0.151	0.054	0.072	13	0.076	0.0328138
216	0.267	0.526	0.562	0.709	0.341	0.54	0.464	0.474	0.482	0.537	0.412	0.604	12	0.479	0.112189	1	0.259	0.285	0.548	0.416	0.402	0.606	0.275	0.379	0.307	0.52	0.291	11	0.374	0.115822	0.7803	0.0485	0.224	0.264	0.336	0.227	N.A.	0.373	0.209	0.337	0.274	0.32	0.302	0.415	0.365	0.253	13	0.294	0.0636274
217	0.572	0.61	0.703	0.831	0.484	0.794	0.544	0.653	0.591	0.639	0.53	0.641	12	0.625	0.0988554	1	0.415	0.508	0.525	0.59	0.547	0.706	0.551	0.514	0.515	0.638	0.585	11	0.549	0.0725346	0.8783	0.0486	0.586	0.556	0.588	0.612	0.643	0.615	0.624	0.549	0.514	0.619	0.607	0.548	0.716	0.634	14	0.599	0.0521541
218	0.217	0.185	0.247	0.161	0.302	0.231	0.247	0.409	0.418	0.477	0.352	0.388	12	0.287	0.0988701	1	0.314	0.33	0.362	0.286	0.339	0.253	0.382	0.433	0.797	0.576	0.393	11	0.385	0.148241	1.3431	0.0487	0.384	0.366	0.267	0.304	0.303	0.293	0.237	0.366	0.309	0.775	0.286	0.672	0.339	0.63	14	0.369	0.178153
220	0.189	0.207	0.302	0.412	0.277	0.516	0.163	0.211	0.254	0.199	0.237	0.168	12	0.246	0.101277	1	0.283	0.337	0.343	0.288	0.28	0.396	0.337	0.295	0.276	0.295	0.295	11	0.31	0.0355049	1.2601	0.049	0.32	0.285	0.333	0.344	0.349	0.302	0.397	0.215	0.382	0.366	0.209	0.356	0.227	0.37	14	0.312	0.0670279
222	0.208	0.26	0.276	0.26	0.206	0.363	0.322	0.302	0.287	0.194	0.211	0.23	12	0.255	0.0503975	1	0.222	0.377	0.384	0.278	0.157	0.111	0.055	0.176	0.306	0.229	0.087	11	0.186	0.106583	0.7291	0.1329	0.15	0.139	0.194	0.142	0.057	0.085	0.207	0.167	0.159	0.115	0.163	0.195	0.159	0.19	14	0.144	0.0443601
223	0.051	0.064	0.071	0.127	0.092	0.1	0.071	0.096	0.09	0.077	0.047	0.061	12	0.076	0.0220093	1	0.075	0.104	0.088	0.072	N.A.	0.014	N.A.	0.038	0.055	0.051	0.028	9	0.05	0.0274752	0.6631	0.0964	0.029	N.A.	N.A.	0.02	0.027	0.029	N.A.	N.A.	0.04	0.028	N.A.	0.039	0.056	0.057	9	0.034	0.0127867
224	0.077	0.136	0.041	0.24	0.134	0.195	0.128	0.167	0.145	0.111	0.084	0.097	12	0.118	0.0518563	1	0.095	0.123	0.138	0.11	N.A.	0.022	N.A.	0.045	0.062	0.044	0.041	9	0.065	0.0392856	0.5474	0.028	0.035	N.A.	0.042	0.031	N.A.	0.068	N.A.	0.029	0.054	0.044	0.035	0.051	0.097	0.08	11	0.048	0.0219697
225	0.034	0.024	0.039	0.062	0.041	0.027	0.016	N.A.	N.A.	0.047	N.A.	0.035	9	0.034	0.0127405	1	0.093	0.065	0.089	0.061	0.064	0.082	0.033	0.071	0.094	N.A.	0.069	10	0.069	0.0175468	2.0606	0.0005	0.069	0.07	0.074	0.077	0.065	0.069	0.075	0.064	0.072	0.125	0.104	0.081	0.082	0.077	14	0.078	0.017331
226	0.152	0.086	0.106	0.046	N.A.	0.13	0.251	0.129	0.212	0.222	0.233	0.173	11	0.143	0.06296	1	0.313	0.241	0.297	0.266	0.161	0.186	N.A.	0.306	0.321	0.131	0.327	10	0.244	0.0682341	1.7099	0.01	0.196	0.24	0.287	0.379	0.213	0.267	0.275	0.26	0.261	0.24	0.238	0.281	0.194	0.207	14	0.249	0.0476263
227	0.369	0.427	0.38	0.399	0.45	0.563	0.361	0.347	0.392	0.295	0.347	0.341	12	0.384	0.0654995	1	0.276	0.321	0.332	0.347	0.709	0.372	0.643	0.313	0.297	0.535	0.377	11	0.391	0.141403	1.0168	0.879	0.326	0.297	0.312	0.351	0.34	0.294	0.303	0.307	0.351	0.297	0.305	0.333	0.396	0.336	14	0.324	0.02958
229	1.145	1.393	1.034	0.923	0.726	1.395	1.436	1.214	1.098	1.183	1.077	1.022	12	1.119	0.198595	1	0.977	0.915	1.101	1.17	1.246	1.345	1.567	1.204	1.253	1.135	1.659	11	1.216	0.214187	1.0869	0.2939	1.561	1.393	1.502	1.629	1.21	1.276	1.667	1.256	1.45	1.432	1.045	1.354	1.442	1.348	14	1.388	0.171723
230	0.141	0.19	0.105	0.045	0.088	0.043	0.399	0.193	0.112	0.178	0.194	0.067	12	0.121	0.0934337	1	0.085	0.042	0.067	0.061	0.096	0.042	N.A.	0.092	0.092	0.05	0.045	10	0.064	0.0211509	0.5278	0.0093	N.A.	0.076	0.059	0.019	0.033	0.076	0.077	0.095	0.044	0.06	0.066	0.094	0.036	0.066	13	0.057	0.0238112
231	N.A.	N.A.	0.064	0.065	0.073	0.078	0.049	0.095	0.061	0.108	0.074	0.049	10	0.069	0.0177663	1	0.068	0.052	N.A.	0.038	0.049	N.A.	N.A.	0.055	0.067	0.075	0.019	8	0.049	0.0169811	0.7105	0.0801	N.A.	0.054	N.A.	N.A.	N.A.	0.035	0.04	0.036	0.023	0.026	0.058	N.A.	0.012	N.A.	8	0.032	0.0135059
232	1.42	1.582	1.652	1.253	1.416	1.401	1.751	1.411	1.293	1.415	1.33	1.202	12	1.419	0.155225	1	1.436	1.305	1.414	1.403	1.41	2.091	1.771	1.471	1.404	1.517	1.581	11	1.515	0.21284	1.0673	0.22	1.67	1.509	1.603	1.888	1.806	1.697	1.674	1.488	1.606	1.723	1.324	1.369	1.838	1.925	14	1.642	0.193124
233	0.481	0.424	0.398	0.432	0.426	0.473	0.318	0.303	0.333	0.234	0.342	0.376	12	0.371	0.0710954	1	0.34	0.394	0.435	0.296	0.206	0.222	0.105	0.307	0.34	0.308	N.A.	10	0.277	0.0911669	0.7458	0.0623	0.335	0.226	0.265	0.214	0.091	0.216	0.278	0.19	0.311	0.332	0.319	0.293	0.317	0.355	14	0.255	0.0751852
234	N.A.	N.A.	0.097	0.107	0.1	0.119	0.113	N.A.	N.A.	0.084	0.044	0.099	8	0.092	0.0218228	1	0.063	0.073	0.058	0.053	0.044	0.017	0.026	0.08	0.102	0.056	0.041	11	0.05	0.023026	0.5455	0.0051	0.069	0.037	0.035	0.061	0.057	0.088	0.116	N.A.	0.028	0.069	0.041	0.066	0.034	0.042	13	0.053	0.0253606
235	0.274	0.194	0.156	0.198	N.A.	0.269	0.169	0.148	0.144	0.097	0.161	0.159	11	0.172	0.0504291	1	0.159	0.191	0.238	0.12	0.069	0.09	0.048	0.126	0.193	0.159	0.053	11	0.117	0.0596221	0.6767	0.052	0.138	0.072	0.084	0.072	0.025	0.079	0.101	0.085	0.119	0.154	0.105	0.131	0.201	0.161	14	0.099	0.0463709
236	0.289	0.219	0.11	0.187	0.231	0.256	0.21	0.175	0.165	0.097	0.145	0.135	12	0.176	0.0560706	1	0.226	0.246	0.127	0.137	0.086	0.07	0.094	0.196	0.221	0.097	0.086	11	0.131	0.0625312	0.7447	0.0957	0.138	0.077	0.121	0.096	0.076	0.15	0.157	0.104	0.108	0.158	0.122	0.151	0.12	0.102	14	0.117	0.0267338
237	0.83	1.001	1.024	0.748	0.718	0.876	1.162	0.902	0.811	1.048	0.786	0.818	12	0.884	0.130701	1	0.832	0.966	0.892	0.956	1.098	0.909	1.022	0.898	0.952	0.968	0.92	11	0.944	0.0675254	1.0676	0.1949	1.158	0.981	1.099	1.301	0.985	1.004	1.145	1.009	1.066	0.993	0.906	1.043	1.309	0.999	14	1.065	0.12432
238	0.219	0.125	0.21	N.A.	0.147	0.118	0.331	0.221	0.192	0.206	0.256	0.094	11	0.181	0.0654332	1	0.129	0.046	0.071	N.A.	0.165	0.054	0.029	0.108	0.135	0.121	0.046	10	0.078	0.0443896	0.4322	0.0015	N.A.	0.102	0.095	0.116	0.043	N.A.	0.181	0.199	0.068	0.071	0.126	0.116	0.071	0.095	12	0.098	0.0477393
239	0.117	0.07	0.101	0.126	0.155	0.086	0.091	0.158	0.113	0.101	0.143	0.099	12	0.11	0.0264869	1	0.106	0.11	0.084	0.099	0.091	0.107	0.078	0.106	0.108	0.073	0.076	11	0.093	0.0136932	0.8469	0.0666	0.093	0.096	0.076	N.A.	0.046	0.085	0.038	0.099	0.074	0.077	0.105	0.079	0.037	0.068	13	0.071	0.0226354
240	0.315	0.263	0.188	0.269	0.285	0.237	0.191	0.173	0.192	0.109	0.145	0.158	12	0.201	0.0600936	1	0.196	0.227	0.203	0.188	0.144	0.122	0.141	0.119	0.179	0.209	0.121	11	0.164	0.0378068	0.8129	0.0901	0.207	0.115	0.135	0.099	0.07	0.086	0.176	0.151	0.156	0.144	0.115	0.156	0.127	0.162	14	0.131	0.0328176
241	0.53	0.283	0.345	0.463	0.361	0.475	0.32	0.262	0.277	0.18	0.285	0.299	12	0.326	0.0974372	1	0.369	0.5	0.421	0.251	0.125	0.258	N.A.	0.166	0.36	0.33	0.133	10	0.264	0.119908	0.8095	0.2503	0.369	0.149	0.23	0.153	0.132	0.103	0.273	0.122	0.158	0.437	0.134	0.163	0.28	0.21	14	0.19	0.0942442
242	0.563	1.29	1.151	0.71	0.859	0.82	0.94	0.98	1.226	0.925	0.719	0.708	12	0.882	0.215385	1	1.008	0.906	0.695	1.071	0.934	1.286	1.041	0.982	0.976	0.837	1.133	11	0.977	0.147216	1.1069	0.2566	0.844	1.35	1.018	1.793	1.177	1.227	1.31	1.315	1.223	1.109	1.125	1.279	1.373	1.307	14	1.23	0.176413
243	N.A.	0.089	0.107	0.141	0.107	0.129	0.091	0.091	0.067	0.147	0.091	0.102	11	0.103	0.0232311	1	0.09	0.125	0.09	0.084	0.031	0.049	N.A.	0.082	0.17	0.091	0.054	10	0.078	0.0375079	0.7595	0.1269	0.081	0.044	0.052	0.026	N.A.	0.056	0.051	0.051	0.101	0.07	0.06	0.074	0.116	0.084	13	0.062	0.0249618
244	0.261	0.202	0.192	0.244	0.184	0.211	0.17	0.171	0.164	0.106	0.163	0.196	12	0.184	0.0385343	1	0.16	0.2	0.198	0.131	0.046	0.081	N.A.	0.114	0.231	0.174	0.085	10	0.128	0.0573236	0.6952	0.0581	0.126	0.113	0.076	0.051	N.A.	0.078	0.19	0.099	0.151	0.098	0.111	0.122	0.16	0.177	13	0.112	0.0425536
245	0.844	0.659	0.716	0.838	0.788	0.826	0.556	0.796	0.743	0.643	0.685	0.713	12	0.729	0.0851356	1	0.615	0.771	0.574	0.785	0.51	0.956	0.647	0.617	0.665	0.569	0.568	11	0.651	0.122936	0.8934	0.1041	0.622	0.546	0.559	0.533	0.615	0.472	0.656	0.614	0.721	0.595	0.603	0.541	0.576	0.661	14	0.591	0.065274
246	0.136	0.061	0.099	0.039	0.153	0.109	0.334	0.087	0.04	0.048	N.A.	0.035	11	0.082	0.0824236	1	0.075	N.A.	0.049	0.037	0.048	0.027	N.A.	0.038	0.035	N.A.	N.A.	7	0.042	0.0144264	0.5165	0.0164	0.035	N.A.	N.A.	0.036	N.A.	0.081	0.055	N.A.	N.A.	0.049	N.A.	0.039	N.A.	N.A.	6	0.047	0.016025
246	0.276	0.259	0.232	0.211	0.14	0.301	0.269	0.245	0.299	0.408	0.302	0.383	12	0.268	0.0687052	1	0.349	0.397	0.376	0.405	0.165	0.332	0.273	0.32	0.324	0.557	0.354	11	0.337	0.0908694	1.2585	0.0706	0.356	0.4	0.321	0.35	0.375	0.35	0.408	0.315	0.429	0.381	0.396	0.382	0.44	0.317	14	0.371	0.0392435
247	0.483	0.581	0.569	0.536	0.632	0.469	0.637	0.626	0.581	0.5	0.507	0.552	12	0.553	0.0559069	1	0.767	0.562	0.589	0.572	0.752	0.632	0.8	0.491	0.466	0.699	0.59	11	0.62	0.106513	1.1208	0.0838	0.557	0.556	0.537	0.65	0.567	0.529	0.589	0.528	0.568	0.548	0.573	0.469	0.561	0.611	14	0.559	0.0448594
248	N.A.	0.413	N.A.	N.A.	N.A.	N.A.	N.A.	N.A.	N.A.	N.A.	N.A.	N.A.	1	0.413	0	1	0.449	0.563	0.467	0.663	0.412	0.543	N.A.	0.576	0.515	0.411	0.519	10	0.506	0.0753071	1.2249	N.A.	0.762	0.435	0.399	1.054	0.515	0.486	0.417	0.334	0.438	0.399	0.502	N.A.	0.379	0.554	13	0.488	0.193075
249	2.169	2.409	2.536	2.494	1.528	1.571	2.497	2.387	1.791	1.827	1.719	1.815	12	2.028	0.373226	1	2.705	1.624	1.244	1.234	3.024	2.376	2.946	1.53	1.594	2.914	1.352	11	1.928	0.706836	0.9511	0.6912	1.915	1.09	1.938	2.188	1.891	1.608	1.854	1.64	1.885	2.282	1.479	1.628	2.378	2.119	14	1.817	0.287873
250	0.936	1.127	0.988	0.546	1.027	0.872	1.294	1.073	1.041	1.016	1.027	1.235	12	0.996	0.180392	1	1.058	0.885	0.934	0.97	1.171	1.306	1.515	1.152	1.217	1.179	1.311	11	1.141	0.177557	1.1456	0.1031	1.232	1.085	1.062	1.072	1.289	1.015	0.89	1.086	1.061	1.258	1.22	1.029	1.108	1.271	14	1.114	0.120475
251	0.17	0.177	0.149	0.132	0.101	0.137	0.213	0.207	0.2	0.15	0.156	0.206	12	0.163	0.0337231	1	0.148	0.167	0.175	0.183	0.166	0.14	0.176	0.172	0.174	0.14	0.186	11	0.165	0.0155122	1.015	0.8389	0.168	0.187	0.173	0.151	0.215	0.197	0.112	0.174	0.169	0.161	0.153	0.149	0.214	0.155	14	0.168	0.0292818
252	1.208	1.196	0.757	0.62	0.626	0.79	0.996	0.721	0.816	0.8	0.998	1.089	12	0.863	0.197769	1	0.628	0.859	1.007	0.891	0.773	1.058	0.907	1.012	0.786	0.69	0.887	11	0.853	0.129142	0.9887	0.8928	1.151	0.864	0.93	0.924	0.768	0.62	0.807	1.015	1.088	1.025	0.975	0.816	1.12	0.962	14	0.922	0.144527
253	1.474	0.993	0.955	0.811	0.856	0.813	1.234	1.542	0.896	1.089	0.819	1.007	12	1.016	0.241232	1	0.89	0.809	0.919	0.74	1.076	1.049	1.027	1.022	0.909	1.193	0.771	11	0.936	0.134137	0.9217	0.314	0.992	0.906	0.817	1.581	0.844	0.962	1.055	0.896	1.037	1.13	0.79	1.006	1.051	1.077	14	0.996	0.198033
254	1.118	1.201	1.142	0.706	0.552	1.184	1.578	1.238	1.086	1.505	1.064	1.101	12	1.084	0.271052	1	0.977	1.009	1.133	1.042	1.282	1.178	1.306	1.26	1.06	1.379	1.232	11	1.162	0.127828	1.0712	0.4606	1.278	1.149	1.284	1.793	1.161	1.084	1.384	1.169	1.171	1.454	1.068	1.25	1.535	1.325	14	1.28	0.209972
255	0.099	0.093	0.11	0.101	0.075	0.068	0.381	0.39	0.214	0.37	N.A.	N.A.	10	0.151	0.130222	1	N.A.	N.A.	N.A.	N.A.	N.A.	N.A.	N.A.	N.A.	N.A.	N.A.	N.A.	0	N.A.	N.A.	0	N.A.	N.A.	N.A.	N.A.	N.A.	N.A.	0.041	0.042	N.A.	N.A.	N.A.	N.A.	N.A.	N.A.	N.A.	2	0.041	0.0005
256	0.109	0.071	0.072	0.087	0.125	0.092	0.476	0.152	0.093	0.06	N.A.	0.141	11	0.111	0.111594	1	N.A.	N.A.	N.A.	N.A.	N.A.	N.A.	N.A.	N.A.	N.A.	N.A.	N.A.	0	N.A.	N.A.	0	N.A.	N.A.	N.A.	N.A.	N.A.	N.A.	N.A.	N.A.	N.A.	N.A.	N.A.	N.A.	0.077	N.A.	N.A.	1	0.077	0
257	N.A.	N.A.	0.102	N.A.	0.037	N.A.	0.029	0.025	0.055	0.051	0.048	0.04	8	0.044	0.0224941	1	N.A.	N.A.	N.A.	N.A.	N.A.	N.A.	N.A.	N.A.	N.A.	N.A.	N.A.	0	N.A.	N.A.	0	N.A.	N.A.	N.A.	N.A.	N.A.	0.027	N.A.	N.A.	N.A.	0.033	N.A.	N.A.	N.A.	N.A.	0.028	3	0.029	0.00262467
259	0.292	0.707	0.247	0.281	N.A.	0.511	0.732	0.604	0.688	0.316	0.249	0.746	11	0.444	0.203178	1	N.A.	N.A.	N.A.	N.A.	N.A.	N.A.	N.A.	N.A.	N.A.	N.A.	N.A.	0	N.A.	N.A.	0	N.A.	N.A.	N.A.	N.A.	N.A.	N.A.	N.A.	N.A.	N.A.	N.A.	N.A.	N.A.	N.A.	N.A.	N.A.	0	N.A.	N.A.
260	0.04	0.056	N.A.	N.A.	N.A.	N.A.	0.019	0.05	0.045	0.04	N.A.	0.034	7	0.039	0.0110564	1	N.A.	N.A.	N.A.	N.A.	N.A.	N.A.	N.A.	N.A.	N.A.	N.A.	N.A.	0	N.A.	N.A.	0	N.A.	N.A.	N.A.	N.A.	N.A.	N.A.	N.A.	N.A.	N.A.	N.A.	N.A.	N.A.	N.A.	N.A.	N.A.	0	N.A.	N.A.
261	0.2	0.072	0.085	0.094	0.134	0.168	0.082	0.104	0.116	0.049	0.086	0.059	12	0.096	0.0425234	1	N.A.	N.A.	N.A.	N.A.	N.A.	N.A.	N.A.	N.A.	N.A.	N.A.	N.A.	0	N.A.	N.A.	0	N.A.	N.A.	N.A.	N.A.	N.A.	N.A.	N.A.	N.A.	N.A.	N.A.	0.044	N.A.	0.058	0.107	N.A.	3	0.065	0.0270103
262	0.218	0.641	0.131	0.433	0.347	0.343	0.339	0.361	0.305	N.A.	0.208	N.A.	10	0.306	0.132822	1	N.A.	N.A.	N.A.	N.A.	N.A.	N.A.	N.A.	N.A.	N.A.	N.A.	N.A.	0	N.A.	N.A.	0	N.A.	N.A.	N.A.	N.A.	N.A.	N.A.	N.A.	N.A.	N.A.	N.A.	N.A.	N.A.	N.A.	N.A.	N.A.	0	N.A.	N.A.
263	0.209	N.A.	0.244	0.162	0.277	0.188	0.413	0.291	0.363	0.344	0.349	0.496	11	0.288	0.0967603	1	N.A.	N.A.	N.A.	N.A.	N.A.	N.A.	N.A.	N.A.	N.A.	N.A.	N.A.	0	N.A.	N.A.	0	N.A.	N.A.	N.A.	N.A.	N.A.	N.A.	N.A.	N.A.	N.A.	N.A.	N.A.	N.A.	N.A.	N.A.	N.A.	0	N.A.	N.A.
265	N.A.	N.A.	0.023	0.065	0.098	0.046	0.052	0.032	0.039	0.093	N.A.	N.A.	8	0.05	0.0257002	1	N.A.	N.A.	N.A.	N.A.	N.A.	N.A.	N.A.	N.A.	N.A.	N.A.	N.A.	0	N.A.	N.A.	0	N.A.	N.A.	N.A.	N.A.	N.A.	N.A.	N.A.	N.A.	N.A.	N.A.	N.A.	N.A.	N.A.	N.A.	N.A.	0	N.A.	N.A.
266	0.121	0.086	0.129	0.159	0.127	0.165	0.182	0.133	0.147	0.126	0.138	0.164	12	0.137	0.0244783	1	N.A.	N.A.	N.A.	N.A.	N.A.	N.A.	N.A.	N.A.	N.A.	N.A.	N.A.	0	N.A.	N.A.	0	N.A.	N.A.	N.A.	N.A.	N.A.	N.A.	N.A.	N.A.	N.A.	N.A.	N.A.	N.A.	N.A.	0.073	N.A.	1	0.073	0
267	N.A.	0.111	0.112	N.A.	N.A.	N.A.	0.034	0.271	N.A.	0.117	N.A.	0.206	6	0.118	0.0762527	1	N.A.	N.A.	N.A.	N.A.	N.A.	N.A.	N.A.	N.A.	N.A.	N.A.	N.A.	0	N.A.	N.A.	0	N.A.	N.A.	N.A.	N.A.	N.A.	N.A.	N.A.	N.A.	N.A.	N.A.	N.A.	N.A.	N.A.	0.031	N.A.	1	0.031	0
268	0.081	0.124	0.125	N.A.	0.102	0.082	0.149	0.039	0.141	0.108	0.176	0.154	11	0.109	0.0375024	1	N.A.	N.A.	N.A.	N.A.	N.A.	N.A.	N.A.	N.A.	N.A.	N.A.	N.A.	0	N.A.	N.A.	0	N.A.	N.A.	N.A.	N.A.	N.A.	N.A.	N.A.	N.A.	N.A.	N.A.	N.A.	N.A.	N.A.	N.A.	N.A.	0	N.A.	N.A.
269	0.224	0.248	N.A.	N.A.	0.007	N.A.	0.074	0.186	N.A.	N.A.	N.A.	0.513	6	0.119	0.160062	1	N.A.	N.A.	N.A.	N.A.	N.A.	N.A.	N.A.	N.A.	N.A.	N.A.	N.A.	0	N.A.	N.A.	0	N.A.	N.A.	N.A.	N.A.	N.A.	N.A.	N.A.	N.A.	N.A.	N.A.	N.A.	N.A.	N.A.	N.A.	N.A.	0	N.A.	N.A.
270	0.95	0.214	0.077	0.016	N.A.	0.021	0.214	0.506	1.36	N.A.	0.255	N.A.	9	0.179	0.437285	1	N.A.	N.A.	N.A.	N.A.	N.A.	N.A.	N.A.	N.A.	N.A.	N.A.	N.A.	0	N.A.	N.A.	0	N.A.	N.A.	N.A.	N.A.	N.A.	N.A.	N.A.	N.A.	N.A.	N.A.	N.A.	N.A.	N.A.	N.A.	N.A.	0	N.A.	N.A.
271	0.327	N.A.	0.167	0.183	0.2	0.302	0.174	0.161	0.141	0.101	0.135	0.125	11	0.173	0.0675292	1	N.A.	N.A.	N.A.	N.A.	N.A.	N.A.	N.A.	N.A.	N.A.	N.A.	N.A.	0	N.A.	N.A.	0	N.A.	N.A.	N.A.	N.A.	N.A.	N.A.	0.393	N.A.	N.A.	N.A.	0.268	0.235	N.A.	0.073	0.02	5	0.13	0.135353
272	0.108	0.093	0.244	0.593	0.23	0.268	0.192	0.498	0.33	0.517	0.073	0.182	12	0.227	0.166525	1	N.A.	N.A.	N.A.	N.A.	N.A.	N.A.	N.A.	N.A.	N.A.	N.A.	N.A.	0	N.A.	N.A.	0	N.A.	N.A.	N.A.	N.A.	N.A.	N.A.	N.A.	N.A.	N.A.	N.A.	N.A.	N.A.	N.A.	N.A.	N.A.	0	N.A.	N.A.
273	0.321	0.367	0.301	0.456	0.42	0.324	0.431	0.444	0.435	0.325	0.202	0.188	12	0.338	0.087427	1	N.A.	N.A.	N.A.	N.A.	N.A.	N.A.	N.A.	N.A.	N.A.	N.A.	N.A.	0	N.A.	N.A.	0	N.A.	N.A.	N.A.	N.A.	N.A.	N.A.	N.A.	N.A.	N.A.	N.A.	N.A.	N.A.	N.A.	N.A.	N.A.	0	N.A.	N.A.
274	N.A.	N.A.	0.067	0.107	0.135	0.055	0.046	0.113	0.058	0.159	0.14	0.108	10	0.091	0.0379046	1	N.A.	N.A.	N.A.	N.A.	N.A.	N.A.	N.A.	N.A.	N.A.	N.A.	N.A.	0	N.A.	N.A.	0	N.A.	N.A.	N.A.	N.A.	N.A.	N.A.	N.A.	N.A.	N.A.	N.A.	N.A.	N.A.	N.A.	N.A.	N.A.	0	N.A.	N.A.
275	N.A.	0.019	N.A.	N.A.	N.A.	N.A.	0.055	0.044	0.052	0.051	0.042	0.063	7	0.044	0.0129709	1	N.A.	N.A.	N.A.	N.A.	N.A.	N.A.	N.A.	N.A.	N.A.	N.A.	N.A.	0	N.A.	N.A.	0	N.A.	N.A.	N.A.	N.A.	N.A.	N.A.	N.A.	N.A.	N.A.	N.A.	N.A.	N.A.	N.A.	N.A.	N.A.	0	N.A.	N.A.
276	0.974	N.A.	0.423	0.564	0.502	0.54	0.577	0.393	0.357	0.33	0.308	0.373	11	0.46	0.179324	1	N.A.	N.A.	N.A.	N.A.	N.A.	N.A.	N.A.	N.A.	N.A.	N.A.	N.A.	0	N.A.	N.A.	0	N.A.	N.A.	N.A.	N.A.	N.A.	N.A.	N.A.	N.A.	N.A.	N.A.	N.A.	N.A.	N.A.	N.A.	N.A.	0	N.A.	N.A.
277	0.334	N.A.	0.228	0.171	0.215	0.274	0.159	0.239	0.245	0.194	0.127	0.282	11	0.217	0.0572622	1	N.A.	N.A.	N.A.	N.A.	N.A.	N.A.	N.A.	N.A.	N.A.	N.A.	N.A.	0	N.A.	N.A.	0	N.A.	N.A.	N.A.	N.A.	N.A.	N.A.	N.A.	N.A.	N.A.	N.A.	N.A.	N.A.	N.A.	N.A.	N.A.	0	N.A.	N.A.
278	0.038	N.A.	N.A.	N.A.	0.194	0.126	0.091	0.098	0.077	N.A.	N.A.	N.A.	6	0.093	0.0480867	1	N.A.	N.A.	N.A.	N.A.	N.A.	N.A.	N.A.	N.A.	N.A.	N.A.	N.A.	0	N.A.	N.A.	0	N.A.	0.044	N.A.	N.A.	N.A.	N.A.	N.A.	N.A.	N.A.	N.A.	N.A.	N.A.	N.A.	N.A.	N.A.	1	0.044	N.A.
279	N.A.	0.035	N.A.	N.A.	0.022	N.A.	0.078	0.034	0.076	0.083	N.A.	N.A.	6	0.049	0.0247768	1	N.A.	N.A.	N.A.	N.A.	N.A.	N.A.	N.A.	N.A.	N.A.	N.A.	N.A.	0	N.A.	N.A.	0	N.A.	N.A.	N.A.	N.A.	N.A.	N.A.	N.A.	N.A.	N.A.	N.A.	N.A.	N.A.	N.A.	N.A.	N.A.	0	N.A.	N.A.
280	0.234	N.A.	0.507	0.425	0.635	0.345	0.6	0.462	0.426	0.397	0.435	0.448	11	0.433	0.105279	1	N.A.	N.A.	N.A.	N.A.	N.A.	N.A.	N.A.	N.A.	N.A.	N.A.	N.A.	0	N.A.	N.A.	0	N.A.	N.A.	N.A.	N.A.	N.A.	N.A.	N.A.	N.A.	N.A.	N.A.	0.312	N.A.	N.A.	N.A.	N.A.	1	0.312	0
281	0.21	0.196	0.221	N.A.	0.29	0.367	0.187	0.296	0.256	0.21	0.255	0.245	11	0.244	0.0508033	1	N.A.	N.A.	N.A.	N.A.	N.A.	N.A.	N.A.	N.A.	N.A.	N.A.	N.A.	0	N.A.	N.A.	0	N.A.	N.A.	N.A.	N.A.	N.A.	N.A.	N.A.	N.A.	N.A.	N.A.	N.A.	N.A.	N.A.	0.109	N.A.	1	0.109	0
282	N.A.	N.A.	N.A.	N.A.	N.A.	N.A.	0.242	N.A.	N.A.	N.A.	N.A.	N.A.	1	0.242	0	1	N.A.	N.A.	N.A.	N.A.	N.A.	N.A.	N.A.	N.A.	N.A.	N.A.	N.A.	0	N.A.	N.A.	0	N.A.	N.A.	N.A.	N.A.	N.A.	N.A.	N.A.	N.A.	N.A.	N.A.	N.A.	N.A.	N.A.	N.A.	N.A.	0	N.A.	N.A.
283	N.A.	N.A.	0.017	0.013	0.02	0.012	N.A.	0.032	0.028	N.A.	0.03	N.A.	7	0.02	0.00764786	1	N.A.	N.A.	N.A.	N.A.	N.A.	N.A.	N.A.	N.A.	N.A.	N.A.	N.A.	0	N.A.	N.A.	0	N.A.	N.A.	N.A.	N.A.	N.A.	N.A.	N.A.	N.A.	N.A.	N.A.	N.A.	N.A.	N.A.	0.009	N.A.	1	0.009	0
284	0.096	0.032	0.033	0.079	0.067	0.075	0.077	0.038	0.038	0.061	N.A.	0.05	11	0.055	0.0208549	1	N.A.	N.A.	N.A.	N.A.	N.A.	N.A.	N.A.	N.A.	N.A.	N.A.	N.A.	0	N.A.	N.A.	0	N.A.	N.A.	N.A.	N.A.	N.A.	N.A.	N.A.	N.A.	N.A.	N.A.	N.A.	N.A.	N.A.	N.A.	N.A.	0	N.A.	N.A.
285	0.05	0.034	0.051	N.A.	0.02	0.017	0.042	0.048	N.A.	0.055	0.102	N.A.	9	0.041	0.0234194	1	N.A.	N.A.	N.A.	N.A.	N.A.	N.A.	N.A.	N.A.	N.A.	N.A.	N.A.	0	N.A.	N.A.	0	N.A.	N.A.	N.A.	N.A.	N.A.	N.A.	N.A.	N.A.	N.A.	N.A.	N.A.	N.A.	N.A.	N.A.	0.031	1	0.031	0
286	0.04	N.A.	0.016	0.023	0.005	0.029	0.016	N.A.	N.A.	N.A.	N.A.	N.A.	6	0.018	0.0110567	1	N.A.	N.A.	N.A.	N.A.	N.A.	N.A.	N.A.	N.A.	N.A.	N.A.	N.A.	0	N.A.	N.A.	0	N.A.	N.A.	N.A.	N.A.	N.A.	N.A.	N.A.	N.A.	N.A.	N.A.	N.A.	N.A.	N.A.	N.A.	N.A.	0	N.A.	N.A.
287	0.077	0.058	0.014	0.008	N.A.	0.021	0.056	0.07	0.063	0.093	0.055	0.108	11	0.045	0.0302302	1	N.A.	N.A.	N.A.	N.A.	N.A.	N.A.	N.A.	N.A.	N.A.	N.A.	N.A.	0	N.A.	N.A.	0	N.A.	N.A.	N.A.	N.A.	N.A.	N.A.	N.A.	N.A.	N.A.	N.A.	N.A.	N.A.	N.A.	N.A.	N.A.	0	N.A.	N.A.
288	0.185	0.125	0.231	0.117	0.202	N.A.	N.A.	N.A.	0.195	0.189	0.217	0.162	9	0.176	0.0366697	1	N.A.	N.A.	N.A.	N.A.	N.A.	N.A.	N.A.	N.A.	N.A.	N.A.	N.A.	0	N.A.	N.A.	0	N.A.	0.082	N.A.	N.A.	N.A.	N.A.	N.A.	N.A.	N.A.	N.A.	N.A.	N.A.	N.A.	N.A.	N.A.	1	0.082	N.A.
289	N.A.	0.015	0.018	0.028	0.045	0.025	N.A.	0.08	N.A.	N.A.	N.A.	N.A.	6	0.03	0.0222217	1	N.A.	N.A.	N.A.	N.A.	N.A.	N.A.	N.A.	N.A.	N.A.	N.A.	N.A.	0	N.A.	N.A.	0	N.A.	N.A.	N.A.	N.A.	N.A.	N.A.	N.A.	N.A.	N.A.	N.A.	N.A.	N.A.	N.A.	N.A.	N.A.	0	N.A.	N.A.
290	N.A.	0.076	0.076	N.A.	N.A.	0.079	0.037	0.067	0.087	0.046	N.A.	0.066	8	0.064	0.015998	1	N.A.	N.A.	N.A.	N.A.	N.A.	N.A.	N.A.	N.A.	N.A.	N.A.	N.A.	0	N.A.	N.A.	0	N.A.	0.037	N.A.	N.A.	N.A.	N.A.	N.A.	N.A.	N.A.	N.A.	N.A.	N.A.	N.A.	N.A.	N.A.	1	0.037	N.A.
291	N.A.	0.027	0.024	0.043	N.A.	0.072	0.038	0.042	0.05	0.054	N.A.	N.A.	8	0.041	0.0143592	1	N.A.	N.A.	N.A.	N.A.	N.A.	N.A.	N.A.	N.A.	N.A.	N.A.	N.A.	0	N.A.	N.A.	0	N.A.	N.A.	N.A.	N.A.	N.A.	N.A.	N.A.	N.A.	N.A.	N.A.	N.A.	N.A.	N.A.	N.A.	N.A.	0	N.A.	N.A.
292	0.083	0.038	0.109	0.146	0.094	0.061	0.052	0.1	0.091	0.117	N.A.	N.A.	10	0.083	0.0306152	1	N.A.	N.A.	N.A.	N.A.	N.A.	N.A.	N.A.	N.A.	N.A.	N.A.	N.A.	0	N.A.	N.A.	0	N.A.	N.A.	N.A.	N.A.	N.A.	N.A.	N.A.	N.A.	N.A.	N.A.	N.A.	N.A.	N.A.	N.A.	N.A.	0	N.A.	N.A.
293	0.423	N.A.	0.777	0.634	0.746	0.551	0.834	0.322	0.283	0.228	0.816	0.953	11	0.541	0.239243	1	N.A.	N.A.	N.A.	N.A.	N.A.	N.A.	N.A.	N.A.	N.A.	N.A.	N.A.	0	N.A.	N.A.	0	N.A.	N.A.	N.A.	N.A.	N.A.	N.A.	N.A.	N.A.	N.A.	N.A.	N.A.	N.A.	N.A.	N.A.	N.A.	0	N.A.	N.A.
294	0.053	N.A.	0.043	0.196	0.069	0.064	0.555	N.A.	0.11	N.A.	N.A.	N.A.	7	0.103	0.170012	1	N.A.	N.A.	N.A.	N.A.	N.A.	N.A.	N.A.	N.A.	N.A.	N.A.	N.A.	0	N.A.	N.A.	0	N.A.	N.A.	N.A.	N.A.	N.A.	N.A.	N.A.	N.A.	N.A.	N.A.	N.A.	N.A.	N.A.	N.A.	N.A.	0	N.A.	N.A.
295	N.A.	N.A.	0.045	0.015	0.029	0.007	0.034	0.071	N.A.	N.A.	N.A.	N.A.	6	0.026	0.0208307	1	N.A.	N.A.	N.A.	N.A.	N.A.	N.A.	N.A.	N.A.	N.A.	N.A.	N.A.	0	N.A.	N.A.	0	N.A.	N.A.	N.A.	N.A.	N.A.	N.A.	N.A.	N.A.	N.A.	N.A.	N.A.	N.A.	N.A.	N.A.	N.A.	0	N.A.	N.A.
296	N.A.	N.A.	0.018	0.019	0.029	0.016	0.034	0.013	N.A.	N.A.	N.A.	N.A.	6	0.02	0.00745542	1	N.A.	N.A.	N.A.	N.A.	N.A.	N.A.	N.A.	N.A.	N.A.	N.A.	N.A.	0	N.A.	N.A.	0	N.A.	N.A.	N.A.	N.A.	N.A.	N.A.	N.A.	N.A.	N.A.	N.A.	N.A.	N.A.	N.A.	N.A.	N.A.	0	N.A.	N.A.
297	0.082	0.183	0.113	0.073	N.A.	0.205	0.133	0.347	0.138	0.162	N.A.	0.162	10	0.146	0.0738956	1	N.A.	N.A.	N.A.	N.A.	N.A.	N.A.	N.A.	N.A.	N.A.	N.A.	N.A.	0	N.A.	N.A.	0	N.A.	N.A.	N.A.	N.A.	N.A.	N.A.	N.A.	N.A.	N.A.	N.A.	N.A.	N.A.	N.A.	N.A.	N.A.	0	N.A.	N.A.
298	0.096	0.028	0.059	0.006	0.038	0.022	0.12	0.135	0.08	0.09	0.134	0.096	12	0.057	0.0424663	1	N.A.	N.A.	N.A.	N.A.	N.A.	N.A.	N.A.	N.A.	N.A.	N.A.	N.A.	0	N.A.	N.A.	0	N.A.	N.A.	N.A.	N.A.	N.A.	N.A.	N.A.	N.A.	N.A.	N.A.	N.A.	N.A.	N.A.	N.A.	N.A.	0	N.A.	N.A.
299	0.114	0.026	N.A.	0.059	0.01	0.046	N.A.	N.A.	0.087	N.A.	N.A.	N.A.	6	0.043	0.0352231	1	N.A.	N.A.	N.A.	N.A.	N.A.	N.A.	N.A.	N.A.	N.A.	N.A.	N.A.	0	N.A.	N.A.	0	N.A.	N.A.	N.A.	N.A.	N.A.	N.A.	N.A.	N.A.	N.A.	N.A.	N.A.	N.A.	N.A.	N.A.	N.A.	0	N.A.	N.A.
300	N.A.	0.368	0.597	0.528	0.555	0.588	0.503	0.507	0.695	0.423	0.348	1.581	11	0.556	0.322586	1	N.A.	N.A.	N.A.	N.A.	N.A.	N.A.	N.A.	N.A.	N.A.	N.A.	N.A.	0	N.A.	N.A.	0	N.A.	N.A.	N.A.	N.A.	N.A.	N.A.	N.A.	N.A.	N.A.	0.386	N.A.	N.A.	N.A.	N.A.	0.273	2	0.325	0.0565
301	N.A.	0.173	0.055	N.A.	N.A.	N.A.	0.045	0.039	0.031	0.034	N.A.	N.A.	6	0.051	0.0498812	1	N.A.	N.A.	N.A.	N.A.	N.A.	N.A.	N.A.	N.A.	N.A.	N.A.	N.A.	0	N.A.	N.A.	0	N.A.	N.A.	N.A.	N.A.	N.A.	N.A.	N.A.	N.A.	N.A.	N.A.	N.A.	N.A.	N.A.	N.A.	N.A.	0	N.A.	N.A.
302	0.124	0.154	0.152	N.A.	0.201	N.A.	0.145	0.19	0.225	0.221	0.168	0.278	10	0.181	0.0441357	1	N.A.	N.A.	N.A.	N.A.	N.A.	N.A.	N.A.	N.A.	N.A.	N.A.	N.A.	0	N.A.	N.A.	0	N.A.	0.085	N.A.	N.A.	N.A.	N.A.	N.A.	N.A.	N.A.	N.A.	N.A.	N.A.	N.A.	N.A.	N.A.	1	0.085	N.A.
303	N.A.	0.014	0.021	0.01	N.A.	0.012	0.038	0.021	N.A.	N.A.	N.A.	N.A.	6	0.018	0.00933928	1	N.A.	N.A.	N.A.	N.A.	N.A.	N.A.	N.A.	N.A.	N.A.	N.A.	N.A.	0	N.A.	N.A.	0	N.A.	N.A.	N.A.	N.A.	N.A.	N.A.	N.A.	N.A.	N.A.	N.A.	N.A.	N.A.	N.A.	0.011	N.A.	1	0.011	0
304	0.186	0.066	0.113	0.062	0.139	0.201	0.19	0.068	0.153	0.108	0.131	0.107	12	0.118	0.046678	1	N.A.	N.A.	N.A.	N.A.	N.A.	N.A.	N.A.	N.A.	N.A.	N.A.	N.A.	0	N.A.	N.A.	0	N.A.	N.A.	N.A.	N.A.	N.A.	N.A.	N.A.	N.A.	N.A.	N.A.	N.A.	N.A.	N.A.	N.A.	N.A.	0	N.A.	N.A.
305	0.038	0.023	0.023	0.093	0.057	0.086	0.045	0.036	0.038	0.045	N.A.	0.029	11	0.042	0.0223659	1	N.A.	N.A.	N.A.	N.A.	N.A.	N.A.	N.A.	N.A.	N.A.	N.A.	N.A.	0	N.A.	N.A.	0	N.A.	N.A.	N.A.	N.A.	N.A.	N.A.	N.A.	N.A.	N.A.	N.A.	N.A.	N.A.	N.A.	N.A.	N.A.	0	N.A.	N.A.
306	0.104	0.134	0.161	0.081	0.173	0.136	0.184	0.22	0.178	0.15	0.153	0.135	12	0.146	0.0354098	1	N.A.	N.A.	N.A.	N.A.	N.A.	N.A.	N.A.	N.A.	N.A.	N.A.	N.A.	0	N.A.	N.A.	0	N.A.	N.A.	N.A.	N.A.	N.A.	N.A.	N.A.	N.A.	0.092	N.A.	N.A.	N.A.	N.A.	N.A.	N.A.	1	0.092	0
307	0.146	0.381	0.338	1.018	0.618	0.378	0.403	0.435	0.396	0.275	0.451	0.589	12	0.41	0.208364	1	N.A.	N.A.	N.A.	N.A.	N.A.	N.A.	N.A.	N.A.	N.A.	N.A.	N.A.	0	N.A.	N.A.	0	N.A.	N.A.	N.A.	N.A.	N.A.	N.A.	N.A.	N.A.	N.A.	N.A.	N.A.	N.A.	N.A.	N.A.	N.A.	0	N.A.	N.A.
308	0.108	0.058	0.079	0.124	0.17	0.127	0.151	0.109	0.102	0.082	0.05	0.053	12	0.094	0.0367184	1	N.A.	N.A.	N.A.	N.A.	N.A.	N.A.	N.A.	N.A.	N.A.	N.A.	N.A.	0	N.A.	N.A.	0	N.A.	N.A.	N.A.	N.A.	N.A.	N.A.	N.A.	N.A.	N.A.	N.A.	N.A.	N.A.	N.A.	N.A.	N.A.	0	N.A.	N.A.
309	0.049	0.025	0.035	0.039	N.A.	0.008	0.021	N.A.	0.047	0.076	0.056	0.051	10	0.035	0.0185313	1	N.A.	N.A.	N.A.	N.A.	N.A.	N.A.	N.A.	N.A.	N.A.	N.A.	N.A.	0	N.A.	N.A.	0	N.A.	N.A.	N.A.	N.A.	N.A.	N.A.	N.A.	N.A.	N.A.	N.A.	N.A.	N.A.	N.A.	N.A.	N.A.	0	N.A.	N.A.
310	0.085	0.047	0.039	N.A.	N.A.	0.034	0.134	0.072	0.106	N.A.	0.156	0.076	9	0.074	0.0398128	1	N.A.	N.A.	N.A.	N.A.	N.A.	N.A.	N.A.	N.A.	N.A.	N.A.	N.A.	0	N.A.	N.A.	0	N.A.	N.A.	N.A.	N.A.	N.A.	N.A.	N.A.	N.A.	N.A.	N.A.	N.A.	N.A.	N.A.	N.A.	N.A.	0	N.A.	N.A.
311	0.15	0.114	0.089	N.A.	N.A.	N.A.	0.145	0.186	0.153	0.108	0.183	0.168	9	0.14	0.0319722	1	N.A.	N.A.	N.A.	N.A.	N.A.	N.A.	N.A.	N.A.	N.A.	N.A.	N.A.	0	N.A.	N.A.	0	N.A.	N.A.	N.A.	N.A.	N.A.	N.A.	N.A.	N.A.	N.A.	N.A.	N.A.	N.A.	N.A.	N.A.	N.A.	0	N.A.	N.A.
312	N.A.	0.304	0.304	N.A.	0.326	N.A.	0.16	0.213	0.19	0.182	0.121	N.A.	8	0.214	0.0715385	1	N.A.	N.A.	N.A.	N.A.	N.A.	N.A.	N.A.	N.A.	N.A.	N.A.	N.A.	0	N.A.	N.A.	0	N.A.	N.A.	N.A.	N.A.	N.A.	N.A.	N.A.	N.A.	N.A.	N.A.	N.A.	N.A.	N.A.	N.A.	N.A.	0	N.A.	N.A.
313	N.A.	N.A.	N.A.	0.066	0.046	0.048	0.1	0.029	0.033	N.A.	N.A.	N.A.	6	0.049	0.0238933	1	N.A.	N.A.	N.A.	N.A.	N.A.	N.A.	N.A.	N.A.	N.A.	N.A.	N.A.	0	N.A.	N.A.	0	N.A.	N.A.	N.A.	N.A.	N.A.	N.A.	N.A.	N.A.	N.A.	N.A.	N.A.	N.A.	N.A.	N.A.	N.A.	0	N.A.	N.A.
314	0.77	N.A.	0.509	0.338	0.204	0.242	0.679	0.678	0.648	0.555	0.331	0.363	11	0.443	0.187409	1	N.A.	N.A.	N.A.	N.A.	N.A.	N.A.	N.A.	N.A.	N.A.	N.A.	N.A.	0	N.A.	N.A.	0	N.A.	N.A.	N.A.	N.A.	N.A.	N.A.	N.A.	N.A.	N.A.	N.A.	N.A.	N.A.	N.A.	N.A.	N.A.	0	N.A.	N.A.
315	N.A.	0.187	N.A.	0.116	N.A.	0.227	0.192	0.209	0.217	0.191	0.241	0.142	9	0.187	0.0377683	1	N.A.	N.A.	N.A.	N.A.	N.A.	N.A.	N.A.	N.A.	N.A.	N.A.	N.A.	0	N.A.	N.A.	0	N.A.	N.A.	0.095	N.A.	N.A.	N.A.	N.A.	N.A.	N.A.	N.A.	N.A.	0.111	N.A.	N.A.	N.A.	2	0.103	0
316	N.A.	0.328	0.27	N.A.	N.A.	N.A.	0.291	0.282	0.389	0.22	N.A.	0.324	7	0.297	0.0492569	1	N.A.	N.A.	N.A.	N.A.	N.A.	N.A.	N.A.	N.A.	N.A.	N.A.	N.A.	0	N.A.	N.A.	0	N.A.	N.A.	N.A.	N.A.	N.A.	N.A.	N.A.	N.A.	N.A.	N.A.	N.A.	N.A.	N.A.	N.A.	N.A.	0	N.A.	N.A.
317	0.084	N.A.	0.106	N.A.	N.A.	0.017	0.233	0.092	0.239	0.26	0.231	0.097	9	0.119	0.084074	1	N.A.	N.A.	N.A.	N.A.	N.A.	N.A.	N.A.	N.A.	N.A.	N.A.	N.A.	0	N.A.	N.A.	0	N.A.	0.039	0.087	0.049	0.021	0.033	0.051	0.039	0.086	0.059	0.058	0.039	0.053	0.021	0.064	14	0.046	0.0185828
318	0.343	0.379	0.433	0.458	N.A.	N.A.	N.A.	0.46	N.A.	0.128	0.294	N.A.	7	0.332	0.109332	1	N.A.	N.A.	N.A.	N.A.	N.A.	N.A.	N.A.	N.A.	N.A.	N.A.	N.A.	0	N.A.	N.A.	0	N.A.	0.224	N.A.	N.A.	0.054	0.028	N.A.	0.309	0.172	N.A.	N.A.	0.171	0.362	0.008	0.021	9	0.082	0.128137
319	0.068	N.A.	0.068	0.039	N.A.	0.073	0.175	0.215	0.156	0.07	N.A.	0.084	9	0.092	0.0571392	1	N.A.	N.A.	N.A.	N.A.	N.A.	N.A.	N.A.	N.A.	N.A.	N.A.	N.A.	0	N.A.	N.A.	0	N.A.	N.A.	N.A.	N.A.	N.A.	N.A.	N.A.	0.062	N.A.	N.A.	N.A.	N.A.	0.036	N.A.	N.A.	2	0.047	0.013
320	N.A.	N.A.	N.A.	0.044	0.072	0.044	0.067	0.039	0.097	N.A.	N.A.	N.A.	6	0.057	0.0204675	1	N.A.	N.A.	N.A.	N.A.	N.A.	N.A.	N.A.	N.A.	N.A.	N.A.	N.A.	0	N.A.	N.A.	0	N.A.	0.039	N.A.	N.A.	N.A.	N.A.	N.A.	N.A.	N.A.	0.037	N.A.	N.A.	N.A.	N.A.	N.A.	2	0.038	0
321	0.208	0.18	0.16	0.037	0.16	0.188	0.093	0.139	0.216	0.327	0.139	0.214	12	0.154	0.0684789	1	N.A.	N.A.	N.A.	N.A.	N.A.	N.A.	N.A.	N.A.	N.A.	N.A.	N.A.	0	N.A.	N.A.	0	N.A.	N.A.	N.A.	N.A.	N.A.	N.A.	N.A.	N.A.	N.A.	N.A.	N.A.	N.A.	N.A.	N.A.	N.A.	0	N.A.	N.A.
322	N.A.	0.122	0.166	0.122	0.039	0.046	0.043	0.109	0.097	0.057	0.061	0.09	11	0.078	0.0390556	1	N.A.	N.A.	N.A.	N.A.	N.A.	N.A.	N.A.	N.A.	N.A.	N.A.	N.A.	0	N.A.	N.A.	0	N.A.	N.A.	N.A.	0.044	N.A.	N.A.	0.038	0.051	N.A.	0.018	N.A.	0.065	N.A.	0.028	0.065	7	0.041	0.0177897
323	N.A.	N.A.	0.089	0.065	0.23	0.042	0.032	N.A.	N.A.	0.378	N.A.	N.A.	6	0.094	0.125323	1	N.A.	N.A.	N.A.	N.A.	N.A.	N.A.	N.A.	N.A.	N.A.	N.A.	N.A.	0	N.A.	N.A.	0	N.A.	N.A.	N.A.	N.A.	N.A.	N.A.	N.A.	N.A.	N.A.	N.A.	N.A.	N.A.	N.A.	N.A.	N.A.	0	N.A.	N.A.
324	N.A.	0.066	N.A.	N.A.	N.A.	0.039	0.097	0.014	0.126	N.A.	0.119	N.A.	6	0.061	0.0410261	1	N.A.	N.A.	N.A.	N.A.	N.A.	N.A.	N.A.	N.A.	N.A.	N.A.	N.A.	0	N.A.	N.A.	0	N.A.	N.A.	N.A.	N.A.	N.A.	N.A.	N.A.	N.A.	N.A.	N.A.	N.A.	N.A.	N.A.	0.009	N.A.	1	0.009	0
325	N.A.	N.A.	0.029	0.034	0.017	0.065	0.036	0.046	N.A.	N.A.	N.A.	N.A.	6	0.035	0.0149155	1	N.A.	N.A.	N.A.	N.A.	N.A.	N.A.	N.A.	N.A.	N.A.	N.A.	N.A.	0	N.A.	N.A.	0	N.A.	N.A.	N.A.	N.A.	N.A.	N.A.	N.A.	N.A.	N.A.	N.A.	N.A.	N.A.	N.A.	N.A.	N.A.	0	N.A.	N.A.
326	N.A.	N.A.	0.443	N.A.	0.821	N.A.	0.259	0.467	0.25	0.122	N.A.	N.A.	6	0.332	0.224723	1	N.A.	N.A.	N.A.	N.A.	N.A.	N.A.	N.A.	N.A.	N.A.	N.A.	N.A.	0	N.A.	N.A.	0	N.A.	N.A.	N.A.	N.A.	N.A.	N.A.	N.A.	N.A.	N.A.	N.A.	N.A.	N.A.	N.A.	N.A.	N.A.	0	N.A.	N.A.
327	N.A.	0.045	0.014	0.026	0.018	0.024	0.033	N.A.	N.A.	N.A.	N.A.	N.A.	6	0.025	0.0101598	1	N.A.	N.A.	N.A.	N.A.	N.A.	N.A.	N.A.	N.A.	N.A.	N.A.	N.A.	0	N.A.	N.A.	0	N.A.	N.A.	N.A.	N.A.	N.A.	N.A.	N.A.	N.A.	N.A.	N.A.	N.A.	N.A.	N.A.	N.A.	N.A.	0	N.A.	N.A.
328	0.062	0.064	0.098	0.054	0.047	0.128	0.121	0.075	0.073	0.059	0.099	0.07	12	0.075	0.025202	1	N.A.	N.A.	N.A.	N.A.	N.A.	N.A.	N.A.	N.A.	N.A.	N.A.	N.A.	0	N.A.	N.A.	0	N.A.	0.042	0.039	0.055	0.073	0.065	0.061	0.066	0.045	0.086	0.058	N.A.	N.A.	N.A.	0.031	11	0.054	0.0157078
329	N.A.	N.A.	N.A.	0.04	0.043	0.031	0.025	0.041	0.047	N.A.	N.A.	N.A.	6	0.037	0.00749259	1	N.A.	N.A.	N.A.	N.A.	N.A.	N.A.	N.A.	N.A.	N.A.	N.A.	N.A.	0	N.A.	N.A.	0	N.A.	N.A.	N.A.	N.A.	N.A.	N.A.	N.A.	N.A.	N.A.	N.A.	N.A.	N.A.	N.A.	N.A.	N.A.	0	N.A.	N.A.
330	0.309	0.134	0.067	N.A.	N.A.	0.118	0.045	0.111	N.A.	0.057	0.066	0.126	9	0.097	0.0753595	1	N.A.	N.A.	N.A.	N.A.	N.A.	N.A.	N.A.	N.A.	N.A.	N.A.	N.A.	0	N.A.	N.A.	0	N.A.	N.A.	N.A.	N.A.	N.A.	0.036	N.A.	N.A.	N.A.	N.A.	N.A.	N.A.	N.A.	N.A.	N.A.	1	0.036	0
331	0.48	0.264	0.44	0.32	0.291	0.411	0.189	0.275	0.153	0.177	0.428	0.306	12	0.293	0.104365	1	N.A.	N.A.	N.A.	N.A.	N.A.	N.A.	N.A.	N.A.	N.A.	N.A.	N.A.	0	N.A.	N.A.	0	N.A.	N.A.	N.A.	N.A.	N.A.	N.A.	N.A.	N.A.	N.A.	N.A.	N.A.	N.A.	N.A.	N.A.	N.A.	0	N.A.	N.A.
332	0.224	0.091	0.169	0.332	0.175	0.165	0.193	0.138	0.176	0.124	N.A.	0.183	11	0.17	0.0590969	1	N.A.	N.A.	N.A.	N.A.	N.A.	N.A.	N.A.	N.A.	N.A.	N.A.	N.A.	0	N.A.	N.A.	0	N.A.	N.A.	N.A.	N.A.	N.A.	N.A.	N.A.	N.A.	N.A.	N.A.	N.A.	N.A.	N.A.	N.A.	N.A.	0	N.A.	N.A.
333	0.079	0.07	N.A.	0.08	0.042	0.048	0.06	0.041	0.07	N.A.	0.043	0.048	10	0.056	0.0147882	1	N.A.	N.A.	N.A.	N.A.	N.A.	N.A.	N.A.	N.A.	N.A.	N.A.	N.A.	0	N.A.	N.A.	0	N.A.	N.A.	N.A.	N.A.	N.A.	N.A.	N.A.	N.A.	N.A.	N.A.	N.A.	N.A.	N.A.	N.A.	N.A.	0	N.A.	N.A.
334	0.066	0.065	0.055	0.036	N.A.	0.02	0.065	0.035	0.066	0.065	N.A.	0.065	10	0.051	0.0161666	1	N.A.	N.A.	N.A.	N.A.	N.A.	N.A.	N.A.	N.A.	N.A.	N.A.	N.A.	0	N.A.	N.A.	0	N.A.	N.A.	N.A.	N.A.	N.A.	N.A.	N.A.	N.A.	N.A.	N.A.	N.A.	N.A.	N.A.	N.A.	N.A.	0	N.A.	N.A.
335	0.063	0.059	0.06	0.111	0.127	N.A.	0.068	N.A.	0.067	0.063	N.A.	N.A.	8	0.074	0.0246006	1	N.A.	N.A.	N.A.	N.A.	N.A.	N.A.	N.A.	N.A.	N.A.	N.A.	N.A.	0	N.A.	N.A.	0	N.A.	N.A.	N.A.	N.A.	N.A.	N.A.	N.A.	N.A.	N.A.	N.A.	N.A.	N.A.	N.A.	N.A.	N.A.	0	N.A.	N.A.
336	0.032	N.A.	0.025	0.025	0.025	0.029	N.A.	0.022	N.A.	0.03	N.A.	N.A.	7	0.027	0.00327015	1	N.A.	N.A.	N.A.	N.A.	N.A.	N.A.	N.A.	N.A.	N.A.	N.A.	N.A.	0	N.A.	N.A.	0	N.A.	N.A.	N.A.	N.A.	N.A.	N.A.	N.A.	N.A.	N.A.	N.A.	N.A.	N.A.	N.A.	N.A.	N.A.	0	N.A.	N.A.
337	N.A.	N.A.	0.148	0.129	0.143	0.298	0.147	0.158	0.113	0.109	N.A.	0.178	9	0.151	0.0534508	1	N.A.	N.A.	N.A.	N.A.	N.A.	N.A.	N.A.	N.A.	N.A.	N.A.	N.A.	0	N.A.	N.A.	0	N.A.	N.A.	N.A.	N.A.	N.A.	N.A.	N.A.	N.A.	N.A.	N.A.	N.A.	N.A.	N.A.	N.A.	N.A.	0	N.A.	N.A.
338	N.A.	N.A.	0.186	0.067	N.A.	0.217	0.28	0.168	0.185	0.195	0.228	0.111	9	0.17	0.0592555	1	N.A.	N.A.	N.A.	N.A.	N.A.	N.A.	N.A.	N.A.	N.A.	N.A.	N.A.	0	N.A.	N.A.	0	N.A.	N.A.	N.A.	N.A.	N.A.	N.A.	N.A.	N.A.	N.A.	N.A.	N.A.	N.A.	N.A.	N.A.	N.A.	0	N.A.	N.A.
339	0.082	0.078	0.039	0.006	0.027	0.025	N.A.	0.059	0.051	N.A.	0.109	N.A.	9	0.041	0.0307443	1	N.A.	N.A.	N.A.	N.A.	N.A.	N.A.	N.A.	N.A.	N.A.	N.A.	N.A.	0	N.A.	N.A.	0	N.A.	N.A.	N.A.	N.A.	N.A.	N.A.	N.A.	N.A.	N.A.	N.A.	N.A.	N.A.	N.A.	N.A.	N.A.	0	N.A.	N.A.
340	0.686	N.A.	0.768	0.711	N.A.	N.A.	1.233	1.236	0.854	0.82	N.A.	N.A.	7	0.877	0.217529	1	N.A.	N.A.	N.A.	N.A.	N.A.	N.A.	N.A.	N.A.	N.A.	N.A.	N.A.	0	N.A.	N.A.	0	N.A.	N.A.	N.A.	N.A.	N.A.	N.A.	N.A.	N.A.	N.A.	N.A.	N.A.	N.A.	N.A.	N.A.	N.A.	0	N.A.	N.A.
341	0.073	0.022	N.A.	N.A.	N.A.	N.A.	0.057	0.031	0.09	0.096	N.A.	0.064	7	0.055	0.0257761	1	N.A.	N.A.	N.A.	N.A.	N.A.	N.A.	N.A.	N.A.	N.A.	N.A.	N.A.	0	N.A.	N.A.	0	N.A.	N.A.	N.A.	N.A.	N.A.	N.A.	N.A.	N.A.	N.A.	N.A.	N.A.	N.A.	N.A.	N.A.	N.A.	0	N.A.	N.A.
342	0.155	0.037	0.123	0.094	0.153	0.102	0.309	N.A.	N.A.	0.1	N.A.	N.A.	8	0.116	0.0747804	1	N.A.	N.A.	N.A.	N.A.	N.A.	N.A.	N.A.	N.A.	N.A.	N.A.	N.A.	0	N.A.	N.A.	0	N.A.	N.A.	N.A.	N.A.	N.A.	N.A.	N.A.	N.A.	N.A.	N.A.	N.A.	N.A.	N.A.	N.A.	N.A.	0	N.A.	N.A.
343	N.A.	N.A.	0.105	0.107	0.178	0.139	0.171	N.A.	N.A.	0.129	N.A.	N.A.	6	0.135	0.0283456	1	N.A.	N.A.	N.A.	N.A.	N.A.	N.A.	N.A.	N.A.	N.A.	N.A.	N.A.	0	N.A.	N.A.	0	N.A.	N.A.	N.A.	N.A.	N.A.	N.A.	N.A.	N.A.	N.A.	N.A.	N.A.	N.A.	N.A.	N.A.	N.A.	0	N.A.	N.A.
344	N.A.	N.A.	0.015	0.022	0.046	0.028	0.037	0.039	0.037	N.A.	N.A.	N.A.	7	0.03	0.01	1	N.A.	N.A.	N.A.	N.A.	N.A.	N.A.	N.A.	N.A.	N.A.	N.A.	N.A.	0	N.A.	N.A.	0	N.A.	N.A.	N.A.	N.A.	N.A.	N.A.	N.A.	N.A.	N.A.	N.A.	N.A.	N.A.	N.A.	N.A.	N.A.	0	N.A.	N.A.
345	N.A.	N.A.	N.A.	0.011	0.021	0.009	0.022	0.025	0.034	N.A.	N.A.	N.A.	6	0.019	0.00843933	1	N.A.	N.A.	N.A.	N.A.	N.A.	N.A.	N.A.	N.A.	N.A.	N.A.	N.A.	0	N.A.	N.A.	0	N.A.	N.A.	N.A.	N.A.	N.A.	N.A.	N.A.	N.A.	N.A.	N.A.	N.A.	N.A.	N.A.	N.A.	N.A.	0	N.A.	N.A.
346	N.A.	0.014	0.014	0.009	0.011	N.A.	0.025	0.015	N.A.	N.A.	N.A.	N.A.	6	0.014	0.00505525	1	N.A.	N.A.	N.A.	N.A.	N.A.	N.A.	N.A.	N.A.	N.A.	N.A.	N.A.	0	N.A.	N.A.	0	N.A.	N.A.	N.A.	N.A.	N.A.	N.A.	N.A.	N.A.	N.A.	N.A.	N.A.	N.A.	N.A.	N.A.	N.A.	0	N.A.	N.A.
347	N.A.	0.346	0.248	N.A.	N.A.	0.365	0.304	N.A.	0.317	0.25	0.33	0.313	8	0.306	0.0391358	1	N.A.	N.A.	N.A.	N.A.	N.A.	N.A.	N.A.	N.A.	N.A.	N.A.	N.A.	0	N.A.	N.A.	0	N.A.	N.A.	N.A.	N.A.	N.A.	N.A.	N.A.	N.A.	N.A.	N.A.	N.A.	N.A.	N.A.	N.A.	N.A.	0	N.A.	N.A.
348	N.A.	N.A.	N.A.	0.023	0.036	0.011	0.029	0.03	N.A.	N.A.	N.A.	N.A.	5	0.024	0.00847113	1	N.A.	N.A.	N.A.	N.A.	N.A.	N.A.	N.A.	N.A.	N.A.	N.A.	N.A.	0	N.A.	N.A.	0	N.A.	N.A.	N.A.	N.A.	N.A.	N.A.	N.A.	N.A.	N.A.	N.A.	N.A.	N.A.	N.A.	N.A.	N.A.	0	N.A.	N.A.
349	0.024	N.A.	0.03	N.A.	0.016	0.011	N.A.	0.031	0.055	N.A.	N.A.	N.A.	6	0.025	0.014088	1	N.A.	N.A.	N.A.	N.A.	N.A.	N.A.	N.A.	N.A.	N.A.	N.A.	N.A.	0	N.A.	N.A.	0	N.A.	N.A.	N.A.	N.A.	N.A.	N.A.	N.A.	N.A.	N.A.	N.A.	N.A.	N.A.	N.A.	N.A.	N.A.	0	N.A.	N.A.
350	0.13	0.167	0.098	0.163	0.19	0.15	0.317	0.306	0.241	0.148	N.A.	0.028	11	0.151	0.0814726	1	N.A.	N.A.	N.A.	N.A.	N.A.	N.A.	N.A.	N.A.	N.A.	N.A.	N.A.	0	N.A.	N.A.	0	N.A.	N.A.	N.A.	N.A.	0.203	N.A.	N.A.	0.056	N.A.	N.A.	N.A.	N.A.	0.078	N.A.	N.A.	3	0.096	0.0647371
351	0.037	N.A.	0.056	0.071	0.088	0.087	0.088	0.073	N.A.	0.107	N.A.	N.A.	8	0.072	0.0203865	1	N.A.	N.A.	N.A.	N.A.	N.A.	N.A.	N.A.	N.A.	N.A.	N.A.	N.A.	0	N.A.	N.A.	0	N.A.	N.A.	N.A.	N.A.	N.A.	N.A.	N.A.	N.A.	N.A.	N.A.	N.A.	N.A.	N.A.	N.A.	N.A.	0	N.A.	N.A.
352	1.031	1.114	1.004	1.068	1.185	1.127	1.135	1.055	0.787	0.777	0.806	0.741	12	0.973	0.154814	1	N.A.	N.A.	N.A.	N.A.	N.A.	N.A.	N.A.	N.A.	N.A.	N.A.	N.A.	0	N.A.	N.A.	0	N.A.	0.653	0.524	0.625	0.89	0.627	N.A.	0.773	0.737	0.8	0.556	0.658	0.748	1.103	0.817	13	0.718	0.144486
353	0.558	0.817	N.A.	0.582	1.323	1.084	1.273	0.334	0.844	0.503	0.842	0.438	11	0.716	0.319188	1	N.A.	N.A.	N.A.	N.A.	N.A.	N.A.	N.A.	N.A.	N.A.	N.A.	N.A.	0	N.A.	N.A.	0	N.A.	N.A.	N.A.	N.A.	N.A.	N.A.	N.A.	N.A.	N.A.	N.A.	N.A.	N.A.	N.A.	N.A.	N.A.	0	N.A.	N.A.
354	0.026	N.A.	0.091	0.091	0.093	0.058	N.A.	0.088	0.034	0.082	N.A.	N.A.	8	0.064	0.0256268	1	N.A.	N.A.	N.A.	N.A.	N.A.	N.A.	N.A.	N.A.	N.A.	N.A.	N.A.	0	N.A.	N.A.	0	N.A.	N.A.	0.043	N.A.	N.A.	N.A.	N.A.	N.A.	N.A.	N.A.	N.A.	N.A.	N.A.	N.A.	N.A.	1	0.043	N.A.
355	N.A.	0.126	N.A.	0.003	0.008	0.014	0.121	0.173	0.133	0.164	N.A.	N.A.	8	0.046	0.0675273	1	N.A.	N.A.	N.A.	N.A.	N.A.	N.A.	N.A.	N.A.	N.A.	N.A.	N.A.	0	N.A.	N.A.	0	N.A.	N.A.	N.A.	N.A.	N.A.	N.A.	N.A.	N.A.	N.A.	N.A.	N.A.	N.A.	N.A.	N.A.	N.A.	0	N.A.	N.A.
356	N.A.	N.A.	0.081	N.A.	0.047	0.041	0.035	0.027	0.069	N.A.	N.A.	N.A.	6	0.047	0.019	1	N.A.	N.A.	N.A.	N.A.	N.A.	N.A.	N.A.	N.A.	N.A.	N.A.	N.A.	0	N.A.	N.A.	0	N.A.	N.A.	N.A.	N.A.	N.A.	N.A.	N.A.	N.A.	N.A.	N.A.	N.A.	N.A.	N.A.	N.A.	N.A.	0	N.A.	N.A.
357	0.175	0.162	0.115	N.A.	N.A.	N.A.	N.A.	N.A.	N.A.	0.085	0.095	0.115	6	0.12	0.0330845	1	N.A.	N.A.	N.A.	N.A.	N.A.	N.A.	N.A.	N.A.	N.A.	N.A.	N.A.	0	N.A.	N.A.	0	N.A.	N.A.	N.A.	N.A.	N.A.	N.A.	N.A.	N.A.	N.A.	N.A.	N.A.	N.A.	N.A.	N.A.	N.A.	0	N.A.	N.A.
358	0.055	0.024	0.057	N.A.	N.A.	0.054	0.062	N.A.	N.A.	0.048	N.A.	N.A.	6	0.048	0.0123423	1	N.A.	N.A.	N.A.	N.A.	N.A.	N.A.	N.A.	N.A.	N.A.	N.A.	N.A.	0	N.A.	N.A.	0	N.A.	N.A.	N.A.	N.A.	N.A.	N.A.	N.A.	N.A.	N.A.	N.A.	N.A.	N.A.	N.A.	N.A.	N.A.	0	N.A.	N.A.
359	N.A.	N.A.	0.08	0.068	N.A.	0.104	0.107	0.094	N.A.	0.095	N.A.	N.A.	6	0.091	0.013536	1	N.A.	N.A.	N.A.	N.A.	N.A.	N.A.	N.A.	N.A.	N.A.	N.A.	N.A.	0	N.A.	N.A.	0	N.A.	N.A.	N.A.	N.A.	N.A.	N.A.	N.A.	N.A.	N.A.	N.A.	N.A.	N.A.	N.A.	N.A.	N.A.	0	N.A.	N.A.
360	0.027	N.A.	0.031	0.033	N.A.	N.A.	0.018	0.022	0.041	N.A.	N.A.	N.A.	6	0.028	0.00749815	1	N.A.	N.A.	N.A.	N.A.	N.A.	N.A.	N.A.	N.A.	N.A.	N.A.	N.A.	0	N.A.	N.A.	0	N.A.	N.A.	N.A.	N.A.	N.A.	N.A.	N.A.	N.A.	N.A.	N.A.	N.A.	N.A.	N.A.	N.A.	N.A.	0	N.A.	N.A.
361	N.A.	N.A.	N.A.	N.A.	N.A.	N.A.	0.028	0.06	0.041	0.062	0.125	0.067	6	0.057	0.0304818	1	N.A.	N.A.	N.A.	N.A.	N.A.	N.A.	N.A.	N.A.	N.A.	N.A.	N.A.	0	N.A.	N.A.	0	N.A.	N.A.	N.A.	N.A.	N.A.	N.A.	N.A.	N.A.	N.A.	N.A.	N.A.	N.A.	N.A.	N.A.	N.A.	0	N.A.	N.A.
362	0.034	N.A.	0.066	0.019	0.049	0.056	0.042	N.A.	0.04	N.A.	N.A.	N.A.	7	0.041	0.0141291	1	N.A.	N.A.	N.A.	N.A.	N.A.	N.A.	N.A.	N.A.	N.A.	N.A.	N.A.	0	N.A.	N.A.	0	N.A.	N.A.	N.A.	N.A.	N.A.	N.A.	N.A.	N.A.	N.A.	N.A.	N.A.	N.A.	N.A.	N.A.	N.A.	0	N.A.	N.A.
363	N.A.	N.A.	0.026	0.045	0.051	0.04	0.11	0.119	0.113	0.072	N.A.	N.A.	8	0.063	0.0347203	1	N.A.	N.A.	N.A.	N.A.	N.A.	N.A.	N.A.	N.A.	N.A.	N.A.	N.A.	0	N.A.	N.A.	0	N.A.	N.A.	N.A.	N.A.	N.A.	N.A.	N.A.	N.A.	N.A.	N.A.	N.A.	N.A.	N.A.	N.A.	N.A.	0	N.A.	N.A.
364	N.A.	N.A.	0.373	N.A.	N.A.	0.731	0.522	0.44	0.391	0.37	0.356	0.422	8	0.438	0.117085	1	N.A.	N.A.	N.A.	N.A.	N.A.	N.A.	N.A.	N.A.	N.A.	N.A.	N.A.	0	N.A.	N.A.	0	N.A.	N.A.	N.A.	N.A.	N.A.	N.A.	N.A.	N.A.	N.A.	N.A.	N.A.	N.A.	N.A.	N.A.	N.A.	0	N.A.	N.A.
365	N.A.	N.A.	0.022	0.064	N.A.	0.051	0.07	0.06	0.084	0.052	N.A.	0.059	8	0.055	0.0167388	1	N.A.	N.A.	N.A.	N.A.	N.A.	N.A.	N.A.	N.A.	N.A.	N.A.	N.A.	0	N.A.	N.A.	0	N.A.	N.A.	N.A.	N.A.	N.A.	N.A.	N.A.	N.A.	N.A.	0.036	N.A.	N.A.	N.A.	N.A.	N.A.	1	0.036	0
366	0.067	0.036	N.A.	0.039	N.A.	0.043	N.A.	0.313	0.134	0.286	N.A.	N.A.	7	0.09	0.111154	1	N.A.	N.A.	N.A.	N.A.	N.A.	N.A.	N.A.	N.A.	N.A.	N.A.	N.A.	0	N.A.	N.A.	0	N.A.	N.A.	N.A.	N.A.	N.A.	N.A.	N.A.	0.033	N.A.	N.A.	0.023	N.A.	N.A.	N.A.	N.A.	2	0.028	0.005
367	0.497	N.A.	0.134	0.029	0.2	0.095	0.681	0.206	0.092	0.509	0.157	N.A.	10	0.181	0.209099	1	N.A.	N.A.	N.A.	N.A.	N.A.	N.A.	N.A.	N.A.	N.A.	N.A.	N.A.	0	N.A.	N.A.	0	N.A.	N.A.	N.A.	N.A.	N.A.	N.A.	N.A.	N.A.	N.A.	N.A.	N.A.	N.A.	N.A.	N.A.	N.A.	0	N.A.	N.A.
368	N.A.	N.A.	0.17	0.186	0.309	N.A.	0.031	0.53	N.A.	0.485	N.A.	N.A.	6	0.206	0.177079	1	N.A.	N.A.	N.A.	N.A.	N.A.	N.A.	N.A.	N.A.	N.A.	N.A.	N.A.	0	N.A.	N.A.	0	N.A.	N.A.	N.A.	N.A.	N.A.	N.A.	N.A.	N.A.	N.A.	N.A.	N.A.	N.A.	N.A.	N.A.	N.A.	0	N.A.	N.A.
369	0.363	0.356	0.497	N.A.	N.A.	N.A.	N.A.	0.397	N.A.	0.211	0.425	N.A.	6	0.363	0.0868608	1	N.A.	N.A.	N.A.	N.A.	N.A.	N.A.	N.A.	N.A.	N.A.	N.A.	N.A.	0	N.A.	N.A.	0	N.A.	N.A.	N.A.	N.A.	N.A.	N.A.	N.A.	N.A.	N.A.	N.A.	N.A.	N.A.	N.A.	N.A.	N.A.	0	N.A.	N.A.
370	N.A.	0.041	0.018	0.04	0.046	0.036	0.04	0.039	0.03	0.04	N.A.	N.A.	9	0.035	0.00773161	1	N.A.	N.A.	N.A.	N.A.	N.A.	N.A.	N.A.	N.A.	N.A.	N.A.	N.A.	0	N.A.	N.A.	0	N.A.	N.A.	N.A.	N.A.	N.A.	N.A.	N.A.	N.A.	N.A.	0.019	N.A.	N.A.	N.A.	N.A.	N.A.	1	0.019	0
371	0.126	0.174	0.069	0.201	0.299	0.352	0.084	0.124	0.123	0.091	0.094	0.076	12	0.132	0.0871583	1	N.A.	N.A.	N.A.	N.A.	N.A.	N.A.	N.A.	N.A.	N.A.	N.A.	N.A.	0	N.A.	N.A.	0	N.A.	N.A.	N.A.	N.A.	N.A.	N.A.	N.A.	N.A.	N.A.	N.A.	N.A.	N.A.	N.A.	N.A.	N.A.	0	N.A.	N.A.
372	0.48	N.A.	0.099	0.294	N.A.	N.A.	0.222	0.401	0.328	0.322	0.287	0.29	9	0.281	0.100333	1	N.A.	N.A.	N.A.	N.A.	N.A.	N.A.	N.A.	N.A.	N.A.	N.A.	N.A.	0	N.A.	N.A.	0	N.A.	N.A.	N.A.	N.A.	N.A.	N.A.	N.A.	N.A.	N.A.	N.A.	N.A.	N.A.	N.A.	N.A.	N.A.	0	N.A.	N.A.
373	N.A.	N.A.	0.109	0.062	0.179	N.A.	0.361	0.297	N.A.	0.169	N.A.	N.A.	6	0.167	0.103254	1	N.A.	N.A.	N.A.	N.A.	N.A.	N.A.	N.A.	N.A.	N.A.	N.A.	N.A.	0	N.A.	N.A.	0	N.A.	N.A.	N.A.	N.A.	N.A.	N.A.	N.A.	N.A.	N.A.	N.A.	N.A.	N.A.	N.A.	N.A.	N.A.	0	N.A.	N.A.
374	0.066	N.A.	0.031	0.106	0.124	0.108	0.073	0.061	0.047	0.048	0.07	N.A.	10	0.068	0.0286014	1	N.A.	N.A.	N.A.	N.A.	N.A.	N.A.	N.A.	N.A.	N.A.	N.A.	N.A.	0	N.A.	N.A.	0	N.A.	N.A.	N.A.	N.A.	N.A.	N.A.	N.A.	N.A.	N.A.	0.047	N.A.	N.A.	N.A.	N.A.	0.039	2	0.043	0.004
375	0.249	0.307	0.209	N.A.	N.A.	N.A.	0.336	0.481	0.292	0.334	0.128	0.266	9	0.273	0.0918216	1	N.A.	N.A.	N.A.	N.A.	N.A.	N.A.	N.A.	N.A.	N.A.	N.A.	N.A.	0	N.A.	N.A.	0	N.A.	N.A.	N.A.	N.A.	N.A.	N.A.	N.A.	N.A.	N.A.	N.A.	N.A.	N.A.	N.A.	N.A.	N.A.	0	N.A.	N.A.
376	N.A.	N.A.	0.023	0.031	N.A.	0.063	0.124	0.057	0.128	0.073	N.A.	N.A.	7	0.061	0.0382201	1	N.A.	N.A.	N.A.	N.A.	N.A.	N.A.	N.A.	N.A.	N.A.	N.A.	N.A.	0	N.A.	N.A.	0	N.A.	N.A.	N.A.	N.A.	N.A.	N.A.	N.A.	N.A.	N.A.	N.A.	N.A.	N.A.	N.A.	N.A.	N.A.	0	N.A.	N.A.
377	1.413	0.283	0.441	0.352	0.336	0.598	1.727	0.867	0.618	0.618	0.247	0.397	12	0.546	0.445846	1	N.A.	N.A.	N.A.	N.A.	N.A.	N.A.	N.A.	N.A.	N.A.	N.A.	N.A.	0	N.A.	N.A.	0	N.A.	N.A.	N.A.	N.A.	N.A.	N.A.	N.A.	N.A.	N.A.	N.A.	N.A.	N.A.	N.A.	N.A.	N.A.	0	N.A.	N.A.
378	0.103	0.101	0.079	0.171	0.113	0.139	0.093	0.088	0.085	0.071	0.07	0.084	12	0.096	0.0282787	1	N.A.	N.A.	N.A.	N.A.	N.A.	N.A.	N.A.	N.A.	N.A.	N.A.	N.A.	0	N.A.	N.A.	0	N.A.	N.A.	N.A.	N.A.	N.A.	N.A.	N.A.	N.A.	N.A.	N.A.	N.A.	N.A.	N.A.	N.A.	N.A.	0	N.A.	N.A.
379	0.296	0.21	0.247	0.187	N.A.	0.181	0.368	0.337	0.299	0.292	0.305	0.308	11	0.269	0.0582898	1	N.A.	N.A.	N.A.	N.A.	N.A.	N.A.	N.A.	N.A.	N.A.	N.A.	N.A.	0	N.A.	N.A.	0	N.A.	N.A.	N.A.	N.A.	N.A.	N.A.	N.A.	N.A.	N.A.	N.A.	N.A.	N.A.	N.A.	N.A.	N.A.	0	N.A.	N.A.
380	N.A.	0.062	0.02	0.372	0.034	0.074	0.026	0.027	0.038	0.112	N.A.	0.044	10	0.052	0.100569	1	N.A.	N.A.	N.A.	N.A.	N.A.	N.A.	N.A.	N.A.	N.A.	N.A.	N.A.	0	N.A.	N.A.	0	N.A.	N.A.	N.A.	N.A.	N.A.	N.A.	N.A.	N.A.	N.A.	N.A.	N.A.	N.A.	N.A.	N.A.	N.A.	0	N.A.	N.A.
381	0.067	N.A.	0.058	0.226	0.171	0.157	0.131	0.18	0.149	0.136	0.07	0.087	11	0.119	0.0514566	1	N.A.	N.A.	N.A.	N.A.	N.A.	N.A.	N.A.	N.A.	N.A.	N.A.	N.A.	0	N.A.	N.A.	0	N.A.	N.A.	N.A.	N.A.	N.A.	N.A.	N.A.	N.A.	N.A.	N.A.	N.A.	N.A.	N.A.	N.A.	N.A.	0	N.A.	N.A.
382	N.A.	0.095	0.073	0.062	0.056	0.042	0.104	0.115	0.066	0.089	N.A.	0.478	10	0.09	0.121926	1	N.A.	N.A.	N.A.	N.A.	N.A.	N.A.	N.A.	N.A.	N.A.	N.A.	N.A.	0	N.A.	N.A.	0	N.A.	N.A.	N.A.	N.A.	N.A.	N.A.	N.A.	N.A.	N.A.	N.A.	N.A.	N.A.	N.A.	0.067	N.A.	1	0.067	0
383	N.A.	N.A.	0.015	0.027	0.028	0.012	0.024	0.021	N.A.	0.046	N.A.	N.A.	7	0.023	0.0102778	1	N.A.	N.A.	N.A.	N.A.	N.A.	N.A.	N.A.	N.A.	N.A.	N.A.	N.A.	0	N.A.	N.A.	0	N.A.	N.A.	N.A.	N.A.	N.A.	N.A.	N.A.	N.A.	N.A.	N.A.	N.A.	N.A.	N.A.	N.A.	N.A.	0	N.A.	N.A.
384	N.A.	0.151	0.485	0.502	N.A.	N.A.	0.258	0.226	0.374	N.A.	N.A.	0.769	7	0.348	0.195204	1	N.A.	N.A.	N.A.	N.A.	N.A.	N.A.	N.A.	N.A.	N.A.	N.A.	N.A.	0	N.A.	N.A.	0	N.A.	N.A.	N.A.	N.A.	N.A.	N.A.	N.A.	N.A.	N.A.	N.A.	N.A.	N.A.	N.A.	N.A.	N.A.	0	N.A.	N.A.
385	0.056	0.012	N.A.	0.051	0.052	0.103	0.054	N.A.	0.044	N.A.	N.A.	N.A.	7	0.046	0.024718	1	N.A.	N.A.	N.A.	N.A.	N.A.	N.A.	N.A.	N.A.	N.A.	N.A.	N.A.	0	N.A.	N.A.	0	N.A.	N.A.	N.A.	N.A.	N.A.	N.A.	N.A.	N.A.	N.A.	N.A.	N.A.	N.A.	N.A.	N.A.	N.A.	0	N.A.	N.A.
386	0.05	0.015	0.022	N.A.	0.056	0.006	0.035	N.A.	0.041	N.A.	N.A.	N.A.	7	0.026	0.0171333	1	N.A.	N.A.	N.A.	N.A.	N.A.	N.A.	N.A.	N.A.	N.A.	N.A.	N.A.	0	N.A.	N.A.	0	N.A.	N.A.	N.A.	N.A.	N.A.	N.A.	N.A.	N.A.	N.A.	N.A.	N.A.	N.A.	N.A.	N.A.	N.A.	0	N.A.	N.A.
387	N.A.	N.A.	0.029	0.029	0.027	0.027	N.A.	0.044	N.A.	0.058	N.A.	N.A.	6	0.034	0.0115998	1	N.A.	N.A.	N.A.	N.A.	N.A.	N.A.	N.A.	N.A.	N.A.	N.A.	N.A.	0	N.A.	N.A.	0	N.A.	N.A.	N.A.	N.A.	N.A.	N.A.	N.A.	N.A.	N.A.	N.A.	N.A.	N.A.	N.A.	N.A.	N.A.	0	N.A.	N.A.
388	N.A.	N.A.	0.145	N.A.	0.279	0.158	0.125	0.13	N.A.	0.075	N.A.	0.099	7	0.134	0.0606674	1	N.A.	N.A.	N.A.	N.A.	N.A.	N.A.	N.A.	N.A.	N.A.	N.A.	N.A.	0	N.A.	N.A.	0	N.A.	0.034	N.A.	N.A.	N.A.	N.A.	0.052	N.A.	N.A.	N.A.	N.A.	0.049	N.A.	N.A.	N.A.	3	0.044	0.0015
389	0.088	0.167	0.073	0.154	0.102	0.101	0.113	0.075	0.092	0.117	0.091	0.124	12	0.105	0.0278432	1	N.A.	N.A.	N.A.	N.A.	N.A.	N.A.	N.A.	N.A.	N.A.	N.A.	N.A.	0	N.A.	N.A.	0	N.A.	0.038	N.A.	0.046	N.A.	N.A.	N.A.	0.079	N.A.	0.066	N.A.	N.A.	N.A.	0.033	0.046	6	0.049	0.0177341
390	0.14	0.149	0.1	0.231	0.192	0.174	0.091	0.181	0.149	0.084	0.11	0.115	12	0.137	0.0433378	1	N.A.	N.A.	N.A.	N.A.	N.A.	N.A.	N.A.	N.A.	N.A.	N.A.	N.A.	0	N.A.	N.A.	0	N.A.	0.039	N.A.	0.048	N.A.	N.A.	N.A.	N.A.	N.A.	0.119	N.A.	N.A.	N.A.	0.007	0.021	5	0.031	0.0498264
391	0.023	0.014	N.A.	N.A.	N.A.	N.A.	0.059	0.026	0.036	N.A.	N.A.	0.042	6	0.03	0.0145793	1	N.A.	N.A.	N.A.	N.A.	N.A.	N.A.	N.A.	N.A.	N.A.	N.A.	N.A.	0	N.A.	N.A.	0	N.A.	N.A.	N.A.	N.A.	N.A.	N.A.	N.A.	N.A.	N.A.	N.A.	N.A.	N.A.	N.A.	N.A.	N.A.	0	N.A.	N.A.
392	0.04	N.A.	N.A.	N.A.	0.033	0.021	0.095	0.027	0.062	0.079	N.A.	N.A.	7	0.045	0.0260823	1	N.A.	N.A.	N.A.	N.A.	N.A.	N.A.	N.A.	N.A.	N.A.	N.A.	N.A.	0	N.A.	N.A.	0	N.A.	N.A.	N.A.	N.A.	N.A.	N.A.	N.A.	N.A.	N.A.	N.A.	N.A.	N.A.	N.A.	N.A.	N.A.	0	N.A.	N.A.
393	0.571	N.A.	0.375	0.193	0.217	0.264	0.325	0.373	0.287	0.362	0.303	0.373	11	0.318	0.0969112	1	N.A.	N.A.	N.A.	N.A.	N.A.	N.A.	N.A.	N.A.	N.A.	N.A.	N.A.	0	N.A.	N.A.	0	N.A.	0.125	0.149	0.117	0.519	0.082	0.218	0.419	0.242	0.118	0.112	0.3	0.263	0.255	0.163	14	0.191	0.126724
394	0.474	N.A.	0.441	0.249	0.815	0.313	N.A.	0.504	0.539	0.496	0.247	0.366	10	0.418	0.15936	1	N.A.	N.A.	N.A.	N.A.	N.A.	N.A.	N.A.	N.A.	N.A.	N.A.	N.A.	0	N.A.	N.A.	0	N.A.	N.A.	N.A.	N.A.	N.A.	N.A.	N.A.	N.A.	N.A.	N.A.	N.A.	N.A.	0.154	N.A.	N.A.	1	0.154	0
395	0.052	0.057	N.A.	N.A.	0.037	0.011	0.093	N.A.	0.061	N.A.	N.A.	0.072	7	0.047	0.024028	1	N.A.	N.A.	N.A.	N.A.	N.A.	N.A.	N.A.	N.A.	N.A.	N.A.	N.A.	0	N.A.	N.A.	0	N.A.	N.A.	N.A.	N.A.	N.A.	N.A.	N.A.	N.A.	N.A.	N.A.	N.A.	N.A.	N.A.	N.A.	N.A.	0	N.A.	N.A.
396	N.A.	0.029	0.025	0.081	0.076	N.A.	0.078	0.109	0.095	0.085	0.06	0.049	10	0.063	0.0261192	1	N.A.	N.A.	N.A.	N.A.	N.A.	N.A.	N.A.	N.A.	N.A.	N.A.	N.A.	0	N.A.	N.A.	0	N.A.	0.038	N.A.	N.A.	0.05	N.A.	N.A.	N.A.	N.A.	0.04	0.042	N.A.	N.A.	N.A.	N.A.	4	0.042	0.00432049
397	N.A.	N.A.	0.019	N.A.	0.024	0.029	0.04	0.037	0.048	N.A.	N.A.	N.A.	6	0.032	0.00985591	1	N.A.	N.A.	N.A.	N.A.	N.A.	N.A.	N.A.	N.A.	N.A.	N.A.	N.A.	0	N.A.	N.A.	0	N.A.	N.A.	N.A.	N.A.	N.A.	N.A.	N.A.	N.A.	N.A.	N.A.	N.A.	N.A.	N.A.	N.A.	N.A.	0	N.A.	N.A.
398	0.043	N.A.	0.036	0.097	N.A.	0.09	0.088	N.A.	N.A.	0.041	N.A.	N.A.	6	0.06	0.0260603	1	N.A.	N.A.	N.A.	N.A.	N.A.	N.A.	N.A.	N.A.	N.A.	N.A.	N.A.	0	N.A.	N.A.	0	N.A.	N.A.	N.A.	N.A.	N.A.	N.A.	N.A.	N.A.	N.A.	N.A.	N.A.	N.A.	N.A.	N.A.	N.A.	0	N.A.	N.A.
399	N.A.	N.A.	N.A.	0.019	0.012	0.01	0.021	0.014	N.A.	0.036	N.A.	N.A.	6	0.017	0.00863456	1	N.A.	N.A.	N.A.	N.A.	N.A.	N.A.	N.A.	N.A.	N.A.	N.A.	N.A.	0	N.A.	N.A.	0	N.A.	N.A.	N.A.	N.A.	N.A.	N.A.	N.A.	N.A.	N.A.	N.A.	N.A.	N.A.	N.A.	N.A.	N.A.	0	N.A.	N.A.
400	0.266	0.432	0.81	0.575	0.863	N.A.	N.A.	N.A.	N.A.	N.A.	N.A.	0.398	6	0.514	0.217392	1	N.A.	N.A.	N.A.	N.A.	N.A.	N.A.	N.A.	N.A.	N.A.	N.A.	N.A.	0	N.A.	N.A.	0	N.A.	N.A.	N.A.	N.A.	N.A.	N.A.	N.A.	N.A.	N.A.	N.A.	N.A.	N.A.	N.A.	N.A.	N.A.	0	N.A.	N.A.
401	0.077	0.132	N.A.	0.302	N.A.	0.212	N.A.	0.092	0.162	0.079	N.A.	0.031	8	0.111	0.0819412	1	N.A.	N.A.	N.A.	N.A.	N.A.	N.A.	N.A.	N.A.	N.A.	N.A.	N.A.	0	N.A.	N.A.	0	N.A.	N.A.	N.A.	N.A.	N.A.	N.A.	N.A.	N.A.	N.A.	N.A.	N.A.	N.A.	N.A.	N.A.	N.A.	0	N.A.	N.A.
402	0.376	N.A.	0.734	0.389	0.738	0.73	2.886	1.416	0.789	0.825	N.A.	1.168	10	0.842	0.693409	1	N.A.	N.A.	N.A.	N.A.	N.A.	N.A.	N.A.	N.A.	N.A.	N.A.	N.A.	0	N.A.	N.A.	0	N.A.	0.079	0.137	0.12	0.323	0.108	N.A.	0.221	N.A.	0.181	0.291	0.203	N.A.	0.15	0.23	11	0.171	0.0658159
403	0.146	0.169	0.166	0.166	N.A.	0.189	0.098	0.257	0.147	0.153	0.15	0.155	11	0.159	0.0365167	1	N.A.	N.A.	N.A.	N.A.	N.A.	N.A.	N.A.	N.A.	N.A.	N.A.	N.A.	0	N.A.	N.A.	0	N.A.	N.A.	N.A.	N.A.	N.A.	N.A.	N.A.	N.A.	N.A.	N.A.	N.A.	N.A.	N.A.	N.A.	N.A.	0	N.A.	N.A.
405	0.219	0.195	0.309	N.A.	N.A.	0.211	0.49	0.225	0.257	0.403	0.546	N.A.	9	0.296	0.123656	1	N.A.	0.056	N.A.	N.A.	N.A.	0.021	N.A.	0.056	N.A.	0.101	N.A.	4	0.051	0.0283945	0.1718	0.0073	N.A.	N.A.	N.A.	N.A.	0.067	N.A.	N.A.	N.A.	N.A.	N.A.	N.A.	N.A.	N.A.	N.A.	1	0.067	0
406	0.513	N.A.	0.058	0.952	1.614	0.955	0.312	N.A.	0.226	0.733	0.616	N.A.	9	0.482	0.445093	1	0.093	0.037	0.1	0.124	0.289	0.068	0.038	N.A.	0.247	N.A.	0.037	9	0.087	0.0874297	0.1813	0.001	0.232	0.092	0.16	0.042	0.183	N.A.	N.A.	0.088	N.A.	N.A.	N.A.	N.A.	N.A.	0.513	7	0.142	0.184117
407	1.584	0.079	1.018	0.539	0.48	0.504	1.944	1.33	0.762	1.563	0.513	0.442	12	0.69	0.556192	1	N.A.	N.A.	0.25	N.A.	N.A.	0.177	0.092	0.274	0.404	0.115	0.156	7	0.187	0.100204	0.2717	0.0007	0.095	0.539	0.183	0.313	0.177	N.A.	0.65	0.318	0.208	N.A.	0.388	0.122	1.177	N.A.	11	0.29	0.324349
408	0.301	N.A.	0.245	0.056	0.251	0.152	0.276	0.276	0.203	0.324	0.272	N.A.	10	0.215	0.0757063	1	0.126	0.058	0.047	0.03	0.151	0.034	N.A.	0.073	0.124	N.A.	0.022	9	0.06	0.045165	0.2801	0.0004	0.044	0.085	0.092	0.135	0.031	N.A.	0.145	0.151	0.037	0.055	0.107	0.097	0.037	0.053	13	0.072	0.0453118
409	0.08	0.104	0.095	0.08	0.084	0.077	0.321	0.117	0.121	0.185	0.167	0.145	12	0.119	0.0665549	1	N.A.	N.A.	N.A.	N.A.	N.A.	N.A.	N.A.	N.A.	0.036	N.A.	N.A.	1	0.036	0	0.3046	N.A.	N.A.	N.A.	N.A.	N.A.	N.A.	N.A.	N.A.	N.A.	N.A.	N.A.	N.A.	N.A.	N.A.	N.A.	0	N.A.	N.A.
410	N.A.	0.117	N.A.	0.062	0.111	0.02	0.439	0.822	0.891	0.429	0.083	N.A.	9	0.178	0.316356	1	N.A.	0.053	0.061	N.A.	N.A.	N.A.	N.A.	N.A.	N.A.	N.A.	N.A.	2	0.057	0.004	0.3188	0.0301	N.A.	N.A.	N.A.	N.A.	N.A.	N.A.	N.A.	N.A.	N.A.	N.A.	N.A.	N.A.	N.A.	N.A.	0	N.A.	N.A.
411	N.A.	0.186	0.1	0.128	0.323	0.281	0.082	0.23	0.236	0.1	0.116	N.A.	10	0.16	0.0809281	1	N.A.	0.051	N.A.	N.A.	N.A.	N.A.	N.A.	N.A.	N.A.	N.A.	N.A.	1	0.051	0	0.3193	N.A.	N.A.	N.A.	N.A.	N.A.	N.A.	N.A.	N.A.	N.A.	N.A.	N.A.	N.A.	N.A.	N.A.	N.A.	0	N.A.	N.A.
412	0.249	0.16	0.129	0.166	0.201	0.177	0.226	0.186	0.126	0.127	N.A.	0.17	11	0.17	0.0381673	1	0.059	0.067	0.031	0.06	0.043	N.A.	N.A.	N.A.	0.135	0.075	0.039	8	0.058	0.0303436	0.3382	0.0001	0.036	0.028	N.A.	0.077	0.026	0.06	0.079	N.A.	0.025	0.098	0.044	0.139	0.043	0.063	12	0.052	0.0331337
413	N.A.	N.A.	N.A.	0.175	0.133	0.161	0.213	0.3	0.175	0.168	0.117	0.176	9	0.174	0.0497075	1	N.A.	0.068	0.136	0.134	N.A.	0.019	N.A.	N.A.	N.A.	0.034	0.055	6	0.059	0.0455802	0.3406	0.0182	N.A.	N.A.	N.A.	0.059	N.A.	0.072	N.A.	N.A.	0.064	0.064	N.A.	N.A.	0.08	0.032	6	0.059	0.014949
414	0.105	0.046	0.089	0.087	0.117	0.124	0.381	0.291	0.204	0.217	N.A.	0.065	11	0.13	0.0998376	1	N.A.	N.A.	0.04	0.046	N.A.	N.A.	N.A.	0.064	0.066	N.A.	0.022	5	0.044	0.0162678	0.3424	0.0026	N.A.	N.A.	N.A.	N.A.	N.A.	0.048	0.085	N.A.	N.A.	N.A.	0.056	0.076	N.A.	N.A.	4	0.064	0.0148724
415	N.A.	N.A.	0.018	0.59	N.A.	0.259	0.494	0.478	N.A.	0.108	N.A.	N.A.	6	0.202	0.211301	1	N.A.	0.055	0.088	N.A.	N.A.	N.A.	N.A.	N.A.	N.A.	N.A.	N.A.	2	0.069	0.0165	0.3425	0.1245	N.A.	N.A.	N.A.	N.A.	N.A.	N.A.	N.A.	N.A.	N.A.	N.A.	N.A.	N.A.	N.A.	N.A.	0	N.A.	N.A.
416	N.A.	0.677	0.355	0.103	0.082	0.27	N.A.	0.349	0.392	0.222	0.165	0.192	10	0.235	0.165982	1	0.164	N.A.	0.115	N.A.	0.129	0.104	0.056	0.096	0.054	0.065	0.055	9	0.086	0.0366195	0.3667	0.0009	N.A.	N.A.	N.A.	N.A.	N.A.	N.A.	N.A.	N.A.	N.A.	N.A.	N.A.	N.A.	N.A.	N.A.	0	N.A.	N.A.
417	0.198	0.084	0.238	0.119	0.086	N.A.	0.184	0.22	0.157	N.A.	0.116	0.108	10	0.141	0.0533629	1	0.123	N.A.	N.A.	0.09	0.094	0.012	N.A.	0.077	0.038	N.A.	0.045	7	0.056	0.035516	0.3937	0.0202	0.056	0.075	N.A.	0.021	0.043	0.185	0.068	0.053	0.023	0.185	0.101	0.112	0.015	0.067	13	0.06	0.0579
418	N.A.	N.A.	0.127	0.238	0.227	0.243	0.132	0.295	0.283	0.235	0.265	0.289	10	0.225	0.0566607	1	0.063	0.137	0.124	0.145	0.039	0.078	0.057	0.074	0.095	0.114	0.14	11	0.09	0.0354002	0.3987	0	0.071	N.A.	0.12	N.A.	0.093	0.139	N.A.	N.A.	0.08	0.086	0.19	0.067	0.16	0.072	10	0.101	0.0430013
419	0.135	0.219	0.17	0.115	0.157	0.161	0.265	0.3	0.211	0.198	0.186	0.149	12	0.182	0.0514228	1	0.141	0.067	0.086	0.131	0.063	0.042	0.043	0.113	0.094	0.033	0.082	11	0.074	0.0345182	0.4044	0.0001	0.063	0.069	0.066	0.037	0.077	0.081	0.123	0.102	0.049	0.109	0.109	0.129	0.085	0.086	14	0.08	0.0273964
420	0.108	0.443	0.264	0.252	0.481	0.201	0.268	0.166	0.222	0.107	0.544	0.611	12	0.263	0.163725	1	0.095	0.122	N.A.	N.A.	N.A.	N.A.	N.A.	N.A.	0.123	N.A.	N.A.	3	0.113	0.0129701	0.4279	0.0007	N.A.	N.A.	N.A.	N.A.	N.A.	N.A.	N.A.	N.A.	N.A.	N.A.	N.A.	N.A.	N.A.	N.A.	0	N.A.	N.A.
421	0.18	N.A.	0.125	0.135	0.135	0.208	0.056	0.101	0.101	0.054	0.108	0.045	11	0.102	0.0488883	1	0.065	0.029	0.051	0.029	0.047	0.032	N.A.	0.041	0.108	N.A.	0.033	9	0.044	0.0239212	0.4297	0.0008	N.A.	N.A.	N.A.	N.A.	N.A.	N.A.	N.A.	N.A.	N.A.	N.A.	N.A.	N.A.	N.A.	N.A.	0	N.A.	N.A.
422	0.446	0.739	N.A.	1.014	0.877	0.934	0.514	0.575	0.658	0.693	0.395	0.319	11	0.614	0.216337	1	0.166	0.269	0.178	N.A.	0.4	0.177	0.33	0.313	N.A.	0.604	0.352	9	0.285	0.130911	0.4642	0.0007	N.A.	N.A.	N.A.	N.A.	N.A.	N.A.	N.A.	N.A.	N.A.	N.A.	N.A.	N.A.	N.A.	N.A.	0	N.A.	N.A.
423	N.A.	N.A.	0.06	0.061	0.167	0.123	N.A.	0.105	0.149	0.168	0.1	N.A.	8	0.109	0.040277	1	0.055	0.041	0.036	0.078	0.066	0.022	N.A.	0.047	0.094	0.07	0.044	10	0.051	0.0205575	0.4686	0.0016	N.A.	N.A.	N.A.	N.A.	N.A.	N.A.	N.A.	N.A.	N.A.	N.A.	N.A.	N.A.	N.A.	N.A.	0	N.A.	N.A.
424	0.13	0.164	0.192	0.149	N.A.	0.079	0.206	0.096	0.148	0.102	0.073	0.182	11	0.131	0.043903	1	0.099	0.051	0.08	0.06	0.034	0.098	N.A.	0.068	0.088	0.078	0.026	10	0.063	0.0240366	0.4817	0.0007	0.056	N.A.	0.033	0.063	0.055	0.043	0.064	0.045	0.052	0.046	0.038	0.065	N.A.	0.072	12	0.051	0.0107336
425	0.378	N.A.	0.2	0.075	0.106	0.074	0.434	0.308	0.169	0.192	N.A.	0.043	10	0.155	0.12809	1	0.137	0.079	N.A.	0.07	0.144	N.A.	0.03	0.154	0.122	N.A.	0.019	8	0.077	0.0490585	0.4929	0.0731	N.A.	0.075	0.035	0.31	0.055	0.034	0.244	0.05	0.045	0.028	0.06	N.A.	0.02	N.A.	11	0.059	0.0997786
426	0.192	N.A.	0.182	0.071	0.111	0.131	0.648	0.458	0.465	0.547	0.214	0.275	11	0.241	0.186993	1	0.196	0.147	0.163	0.14	0.088	0.08	N.A.	0.159	0.086	0.093	0.106	10	0.12	0.038267	0.498	0.0111	N.A.	0.159	0.086	0.14	0.043	N.A.	0.238	0.202	0.063	0.125	0.178	0.209	0.123	0.168	12	0.13	0.0595793
427	0.185	0.221	0.123	0.065	0.123	0.095	0.247	0.153	0.2	0.166	0.217	0.13	12	0.151	0.0530212	1	0.113	0.09	0.072	0.155	0.067	0.055	0.035	0.079	0.07	0.102	0.099	11	0.08	0.0306707	0.5289	0.0009	0.054	0.117	0.062	0.095	0.065	N.A.	0.121	0.1	0.052	0.1	0.111	0.103	0.035	0.096	13	0.08	0.0262252
428	0.108	N.A.	0.171	0.254	0.189	0.219	0.196	0.198	0.239	0.176	N.A.	0.179	10	0.188	0.0384147	1	N.A.	0.086	0.084	0.208	0.077	N.A.	0.05	0.086	0.142	0.085	0.177	9	0.101	0.0497284	0.5337	0.003	0.122	N.A.	0.18	N.A.	0.119	0.181	N.A.	0.137	N.A.	N.A.	0.197	0.092	0.088	0.093	9	0.129	0.0411195
429	0.128	0.072	0.031	0.103	N.A.	0.075	0.092	0.083	0.064	0.059	0.072	N.A.	10	0.074	0.0248855	1	N.A.	N.A.	0.032	N.A.	N.A.	0.035	N.A.	N.A.	0.036	N.A.	0.059	4	0.039	0.0107819	0.5348	0.01	0.097	N.A.	N.A.	N.A.	0.027	0.043	N.A.	0.048	0.047	0.028	N.A.	N.A.	N.A.	0.033	7	0.042	0.00867307
430	0.219	0.364	0.461	0.723	0.198	0.573	0.353	0.371	0.316	0.26	0.182	0.281	12	0.33	0.153699	1	0.149	N.A.	N.A.	N.A.	0.144	0.206	0.21	N.A.	0.178	0.192	N.A.	6	0.178	0.025758	0.5389	0.0004	0.129	0.16	0.159	0.159	0.155	0.159	0.158	N.A.	N.A.	0.127	0.194	N.A.	N.A.	0.209	10	0.159	0.0251761
431	0.279	0.2	0.161	0.205	0.226	0.298	0.268	0.15	0.195	0.26	0.075	0.124	12	0.191	0.0645994	1	0.116	0.142	0.075	0.123	0.08	0.043	0.043	0.137	0.32	0.165	0.126	11	0.107	0.0726853	0.5604	0.0135	0.076	0.051	N.A.	0.149	0.062	0.335	0.322	0.08	0.082	0.15	0.126	0.214	0.111	0.137	13	0.124	0.08851
432	N.A.	0.115	0.098	N.A.	0.1	0.155	N.A.	0.058	0.064	0.085	0.044	0.076	9	0.083	0.0316684	1	0.053	0.067	0.055	0.04	N.A.	0.023	N.A.	0.07	0.06	0.03	0.047	9	0.047	0.0151225	0.5655	0.0055	0.065	0.039	0.043	0.029	0.062	N.A.	0.05	N.A.	0.036	0.054	N.A.	N.A.	0.034	0.025	10	0.042	0.0128936
433	0.128	0.205	0.221	0.185	0.209	0.193	0.23	0.194	0.197	0.151	0.218	0.217	12	0.193	0.0284878	1	0.161	0.06	0.105	0.152	0.09	0.099	0.187	0.097	0.085	0.122	0.102	11	0.109	0.0358212	0.566	0.0001	0.109	0.084	0.104	0.072	0.112	N.A.	0.09	0.105	0.125	N.A.	0.075	0.068	0.117	0.101	12	0.095	0.0196664
434	0.099	N.A.	N.A.	0.141	0.07	N.A.	0.062	0.062	0.072	0.068	0.077	0.094	9	0.08	0.0239758	1	N.A.	0.049	0.03	0.066	N.A.	N.A.	0.04	0.042	0.056	N.A.	0.041	7	0.045	0.0109638	0.5662	0.0007	0.039	N.A.	0.038	0.036	N.A.	0.07	N.A.	0.044	0.067	N.A.	0.065	0.035	N.A.	0.05	9	0.048	0.0137826
435	0.081	0.161	N.A.	0.134	0.165	0.157	0.095	0.143	0.106	0.118	0.09	0.086	11	0.117	0.0304194	1	0.085	0.096	0.086	0.112	0.033	0.039	0.04	0.078	0.068	0.116	0.051	11	0.067	0.0279462	0.5714	0.0025	0.073	0.045	0.07	0.047	0.054	0.085	0.093	N.A.	0.12	0.061	0.073	0.067	0.107	0.119	13	0.074	0.0251404
436	0.063	0.084	0.067	N.A.	0.048	0.103	N.A.	0.068	0.144	0.101	0.087	0.108	10	0.083	0.0264728	1	0.073	0.03	0.042	0.049	0.062	0.033	0.046	0.061	0.073	N.A.	0.032	10	0.048	0.0155464	0.5719	0.0013	0.044	0.058	0.052	0.027	0.042	0.131	0.064	0.062	0.031	0.083	0.052	0.049	0.03	0.037	14	0.05	0.0289391
437	0.119	0.149	0.08	0.136	0.166	0.119	0.115	0.098	0.096	0.088	0.056	0.069	12	0.103	0.0313195	1	0.062	0.051	N.A.	0.095	0.068	0.046	0.037	0.068	N.A.	0.066	N.A.	8	0.059	0.0164995	0.5776	0.001	0.078	0.05	0.082	0.039	0.098	0.053	0.065	0.051	0.052	0.1	0.039	0.071	0.04	0.072	14	0.061	0.0208319
438	0.081	0.037	0.092	0.096	0.076	0.106	0.027	0.201	0.162	0.235	0.184	0.089	12	0.097	0.0625267	1	0.057	0.045	0.049	0.135	0.073	0.021	0.024	0.068	0.083	0.083	0.064	11	0.056	0.030066	0.5805	0.0416	0.063	0.086	0.047	N.A.	0.044	0.072	0.052	0.068	0.073	0.042	0.093	0.05	0.037	0.037	13	0.056	0.0177921
439	0.099	0.069	0.1	0.079	0.116	0.081	0.115	0.042	0.129	0.057	N.A.	0.078	11	0.083	0.0254526	1	0.049	N.A.	0.061	0.06	0.046	N.A.	N.A.	0.054	0.054	N.A.	0.028	7	0.049	0.0103746	0.5855	0.002	0.055	N.A.	N.A.	0.027	0.068	0.075	0.103	N.A.	0.029	0.071	0.042	0.045	N.A.	0.042	10	0.051	0.023621
440	0.608	0.558	0.238	0.421	0.26	0.732	0.393	0.379	0.389	0.409	0.569	0.449	12	0.429	0.137201	1	0.319	0.328	0.234	0.208	0.304	0.299	0.206	0.204	0.241	N.A.	0.25	10	0.255	0.0463143	0.5945	0.0002	0.23	0.227	0.201	0.197	0.232	0.244	0.215	0.201	0.234	0.251	0.217	0.168	0.209	0.221	14	0.217	0.0224411
441	0.218	0.209	0.152	0.195	0.154	0.275	0.202	0.122	0.144	0.122	0.12	0.122	12	0.163	0.0475788	1	N.A.	N.A.	0.121	0.09	N.A.	N.A.	N.A.	0.121	N.A.	N.A.	0.071	4	0.098	0.0213351	0.6018	0.018	0.132	N.A.	0.074	0.081	N.A.	N.A.	0.092	0.074	N.A.	0.098	0.103	N.A.	0.044	0.082	9	0.083	0.0181502
443	0.363	0.264	0.261	0.081	0.268	0.198	0.229	0.184	0.208	0.175	0.271	0.17	12	0.21	0.0675381	1	N.A.	N.A.	N.A.	N.A.	N.A.	N.A.	N.A.	N.A.	N.A.	N.A.	N.A.	0	N.A.	N.A.	0	N.A.	N.A.	N.A.	N.A.	N.A.	N.A.	N.A.	N.A.	N.A.	N.A.	N.A.	N.A.	N.A.	N.A.	N.A.	0	N.A.	N.A.
444	0.1	0.034	0.055	0.05	0.066	0.096	0.064	N.A.	0.056	0.075	N.A.	N.A.	9	0.063	0.0201151	1	N.A.	N.A.	N.A.	N.A.	N.A.	N.A.	N.A.	N.A.	N.A.	N.A.	N.A.	0	N.A.	N.A.	0	N.A.	N.A.	N.A.	N.A.	N.A.	N.A.	N.A.	N.A.	N.A.	0.035	0.031	N.A.	0.044	0.032	0.024	5	0.033	0.00649307
445	N.A.	N.A.	0.131	0.305	0.139	0.14	0.486	0.741	0.599	N.A.	N.A.	N.A.	7	0.289	0.230156	1	N.A.	N.A.	N.A.	N.A.	N.A.	N.A.	N.A.	N.A.	N.A.	N.A.	N.A.	0	N.A.	N.A.	0	N.A.	N.A.	N.A.	N.A.	N.A.	N.A.	N.A.	N.A.	N.A.	N.A.	N.A.	N.A.	N.A.	N.A.	N.A.	0	N.A.	N.A.
446	N.A.	N.A.	0.055	0.118	0.463	0.249	0.382	N.A.	0.326	N.A.	N.A.	N.A.	6	0.213	0.142932	1	N.A.	N.A.	N.A.	N.A.	N.A.	N.A.	N.A.	N.A.	N.A.	N.A.	N.A.	0	N.A.	N.A.	0	N.A.	N.A.	N.A.	N.A.	N.A.	N.A.	N.A.	0.147	N.A.	N.A.	N.A.	N.A.	N.A.	N.A.	N.A.	1	0.147	0
[truncated: 4 more columns]

## Sheet: Group mean analyses L66 vs NMRI
Group mean analyses L66 vs NMRI
	NMRI			L66 vs. NMRI
Spot ID	Frequency in group	Reference factor	p	Frequency in group	Reference factor	p
8	8	1	n.a.	5	0.2059	0
20	10	1	n.a.	7	1.7655	0.0251
53	10	1	n.a.	7	1.8375	0.0086
64	7	1	n.a.	5	1.8417	0.0123
84	10	1	n.a.	7	0.7946	0.0473
144	10	1	n.a.	7	1.23	0.0363
166	10	1	n.a.	7	4.5783	0.0001
182	10	1	n.a.	7	0.613	0.0091
241	5	1	n.a.	6	0.5503	0.0311
277	9	1	n.a.	5	1.5222	0.0206
283	3	1	n.a.	4	0.331	0.023
344	2	1	n.a.	2	0.1365	0.0223
364	8	1	n.a.	6	1.5996	0.0359
419	8	1	n.a.	6	3.0802	0.0319
420	6	1	n.a.	5	1.9499	0.042
430	10	1	n.a.	7	1.6728	0.0251
432	8	1	n.a.	5	0.5306	0.0227
447	6	1	n.a.	4	3.8797	0.0495
448	6	1	n.a.	4	0.4239	0.0388
449	8	1	n.a.	5	2.2977	0.0458
450	9	1	n.a.	7	3.3549	0.0008
500	5	1	n.a.	4	0.483	0.0457
451	10	1	n.a.	7	1.7287	0.0455
452	7	1	n.a.	6	0.4468	0.0452
453	5	1	n.a.	2	1.7641	0.0387
454	4	1	n.a.	4	0.4306	0.043
455	7	1	n.a.	5	0.3371	0.0425
456	10	1	n.a.	7	1.173	0.0383
457	9	1	n.a.	6	0.4195	0.0408
458	7	1	n.a.	5	0.3382	0.0405
459	8	1	n.a.	7	2.4863	0.0365
460	5	1	n.a.	4	0.2549	0.0362
461	6	1	n.a.	4	0.39	0.0357
462	7	1	n.a.	6	1.7514	0.0352
463	8	1	n.a.	5	1.8681	0.0347
464	5	1	n.a.	4	3.0591	0.0343
465	10	1	n.a.	7	1.3485	0.0337
466	10	1	n.a.	7	0.7062	0.0325
467	10	1	n.a.	6	0.4254	0.0322
468	7	1	n.a.	5	0.4898	0.0322
469	8	1	n.a.	4	1.7786	0.0307
470	9	1	n.a.	7	1.4929	0.0307
471	7	1	n.a.	6	2.3527	0.0305
472	6	1	n.a.	4	0.4371	0.0304
473	7	1	n.a.	4	2.6347	0.0304
474	8	1	n.a.	6	1.8582	0.027
475	6	1	n.a.	4	0.3239	0.0254
476	5	1	n.a.	5	0.194	0.0243
477	7	1	n.a.	6	0.4063	0.0216
478	7	1	n.a.	5	0.3288	0.0203
479	5	1	n.a.	6	0.4117	0.0185
480	10	1	n.a.	6	1.7496	0.0183
481	6	1	n.a.	5	1.7475	0.0171
482	7	1	n.a.	6	0.3662	0.0157
483	10	1	n.a.	7	1.2252	0.0139
484	5	1	n.a.	4	0.1906	0.0128
485	10	1	n.a.	7	0.644	0.0081
486	5	1	n.a.	4	0.5143	0.0074
487	10	1	n.a.	5	1.9368	0.0073
488	8	1	n.a.	5	1.6103	0.0068
489	8	1	n.a.	6	1.38	0.0066
490	9	1	n.a.	7	1.3514	0.0055
491	7	1	n.a.	6	0.4373	0.0052
492	8	1	n.a.	4	0.3595	0.0037
493	9	1	n.a.	6	0.4123	0.0033
494	7	1	n.a.	5	6.9846	0.0032
495	9	1	n.a.	7	0.4557	0.0032
496	7	1	n.a.	6	0.2875	0.0031
497	5	1	n.a.	4	0.3821	0.003
498	3	1	n.a.	4	5.9292	0.0025
499	10	1	n.a.	7	2.3501	0.0013

## Sheet: Group mean analyses LMTM effect
Group mean analyses LMTM effect in Line 66
	L66 vehilce controls			L66 - 15 mg/kg MT			L66 - 45 mg/kg MT
					vs. L66 vehilce controls			vs. L66 vehilce controls		vs. L66 - 15mg/kg MT
Spot ID	Frequency in group	Reference factor	p	Frequency in group	Reference factor	p	Frequency in group	Reference factor	p	Reference factor	p
1	12	1	n.a.	11	0.4734	0	14	0.5252	0	1.1093	0.1781
2	12	1	n.a.	11	3.2836	0	14	2.8594	0	0.8708	0.4056
3	12	1	n.a.	7	0.2639	0	10	0.2673	0	1.0127	0.9118
4	10	1	n.a.	11	1.9512	0	14	1.9335	0	0.9909	0.8903
5	12	1	n.a.	11	0.5577	0	14	0.5722	0	1.026	0.7173
6	11	1	n.a.	11	0.5113	0	14	0.5638	0	1.1027	0.3268
7	12	1	n.a.	11	0.541	0	14	0.6486	0.0002	1.1988	0.0367
8	12	1	n.a.	11	1.7829	0	14	1.4686	0.0016	0.8237	0.0899
9	12	1	n.a.	11	1.8018	0	14	1.6532	0	0.9175	0.0635
10	12	1	n.a.	10	1.8959	0	14	1.7101	0.0001	0.902	0.2445
11	12	1	n.a.	11	0.5029	0	14	0.6952	0.0258	1.3823	0.0497
12	12	1	n.a.	11	0.6919	0	14	0.7708	0.0001	1.114	0.0532
13	10	1	n.a.	11	2.1837	0	14	2.4063	0	1.1019	0.1571
14	12	1	n.a.	11	1.4794	0	14	1.5402	0	1.041	0.5145
15	12	1	n.a.	9	1.9942	0	13	1.5555	0.0018	0.78	0.0421
16	12	1	n.a.	11	1.8151	0	14	1.3383	0.0162	0.7373	0.0182
17	11	1	n.a.	11	1.8763	0	14	1.5181	0.0049	0.8091	0.0664
18	12	1	n.a.	11	0.6612	0	14	0.7667	0.0029	1.1595	0.026
19	12	1	n.a.	8	0.6281	0	14	0.6814	0.0002	1.0848	0.1526
20	12	1	n.a.	11	0.5003	0	14	0.4625	0	0.9245	0.5966
21	12	1	n.a.	11	1.5819	0	14	1.7705	0	1.1192	0.1622
22	12	1	n.a.	11	1.5531	0	14	1.3955	0.0009	0.8985	0.1515
23	12	1	n.a.	11	1.8811	0	13	1.5966	0.0016	0.8488	0.1658
24	12	1	n.a.	11	2.8862	0	14	2.6826	0.0001	0.9295	0.4752
25	12	1	n.a.	11	0.5915	0	14	0.6838	0.0004	1.1561	0.0868
26	12	1	n.a.	11	2.1823	0.0001	14	1.7029	0.0023	0.7803	0.0358
27	12	1	n.a.	11	0.5998	0.0001	14	0.6167	0	1.0282	0.813
28	12	1	n.a.	11	1.2934	0.0001	14	1.1766	0.0053	0.9097	0.0564
29	11	1	n.a.	10	0.4382	0.0001	10	0.5186	0.0001	1.1835	0.2993
31	12	1	n.a.	9	3.046	0.0001	12	1.3552	0.1769	0.4449	0
32	12	1	n.a.	11	0.7506	0.0001	14	0.8021	0.0015	1.0686	0.1894
33	12	1	n.a.	10	2.1304	0.0001	14	1.8725	0.0006	0.8789	0.1935
34	10	1	n.a.	11	0.4221	0.0001	13	0.3584	0	0.8492	0.3474
35	12	1	n.a.	11	1.7196	0.0001	14	1.4425	0.0049	0.8389	0.0913
36	12	1	n.a.	11	0.4014	0.0001	14	0.4804	0.0009	1.1969	0.1961
37	12	1	n.a.	11	0.661	0.0001	14	0.753	0.0003	1.1393	0.1452
38	12	1	n.a.	4	0.2123	0.0001	0	0	n.a.	0	n.a.
39	10	1	n.a.	10	0.3444	0.0002	0	0	n.a.	0	n.a.
40	12	1	n.a.	10	1.3175	0.0002	14	1.2396	0.0046	0.9409	0.4097
41	12	1	n.a.	11	0.7243	0.0002	14	0.8179	0.0353	1.1292	0.156
42	11	1	n.a.	8	0.4992	0.0002	12	0.5086	0	1.0187	0.8864
43	12	1	n.a.	11	0.7361	0.0002	14	0.7836	0.0039	1.0645	0.3793
44	12	1	n.a.	11	0.7107	0.0003	14	0.8007	0.0023	1.1265	0.1476
45	12	1	n.a.	11	0.6401	0.0003	12	0.5962	0	0.9314	0.5151
46	11	1	n.a.	11	2.1321	0.0003	14	2.126	0.0003	0.9971	0.9802
47	12	1	n.a.	11	0.58	0.0003	14	0.6628	0.0002	1.1427	0.2616
48	12	1	n.a.	11	0.7663	0.0003	14	0.6814	0.0003	0.8892	0.212
49	12	1	n.a.	11	0.4968	0.0003	14	0.4914	0.0001	0.9892	0.9441
50	12	1	n.a.	9	1.4918	0.0004	10	1.4348	0.001	0.9618	0.621
51	12	1	n.a.	11	1.5901	0.0004	14	1.7373	0	1.0926	0.26
52	12	1	n.a.	11	0.6355	0.0004	14	0.6036	0.0002	0.9497	0.487
53	12	1	n.a.	11	1.4173	0.0004	14	1.2384	0.0367	0.8738	0.2102
54	10	1	n.a.	11	1.4006	0.0004	14	1.427	0.0005	1.0189	0.8096
55	11	1	n.a.	10	0.5408	0.0004	13	0.5689	0	1.0519	0.7366
56	11	1	n.a.	11	0.4648	0.0005	13	0.5213	0.0012	1.1214	0.4422
57	12	1	n.a.	11	0.6188	0.0005	13	0.5476	0.0004	0.8849	0.4506
58	11	1	n.a.	11	0.4854	0.0005	13	0.4072	0.0001	0.8388	0.4154
59	12	1	n.a.	11	1.3658	0.0006	14	1.4249	0.0001	1.0433	0.4729
60	12	1	n.a.	10	0.4687	0.0006	10	0.4918	0	1.0492	0.7842
61	12	1	n.a.	11	0.6853	0.0006	14	0.7156	0.0009	1.0442	0.6294
62	12	1	n.a.	11	1.5922	0.0006	14	1.5465	0.0005	0.9713	0.7821
63	11	1	n.a.	11	2.548	0.0007	14	2.3132	0.0017	0.9079	0.4521
64	8	1	n.a.	7	0.4796	0.0008	14	0.6916	0.0092	1.4422	0.0371
65	8	1	n.a.	11	0.4564	0.0008	10	0.3722	0.0002	0.8156	0.2573
66	12	1	n.a.	11	1.4109	0.001	14	1.2292	0.0812	0.8712	0.1662
67	12	1	n.a.	11	0.6881	0.001	14	0.7039	0.0001	1.023	0.7947
68	11	1	n.a.	11	0.5955	0.0011	13	0.4219	0	0.7085	0.0378
69	12	1	n.a.	11	0.6101	0.0011	14	0.5987	0.0003	0.9813	0.8872
70	12	1	n.a.	11	0.2883	0.0011	12	0.4202	0	1.4576	0.2321
71	12	1	n.a.	11	0.7086	0.0012	14	0.766	0.0095	1.081	0.4558
73	12	1	n.a.	11	0.6751	0.0013	14	0.7484	0.0056	1.1086	0.4006
74	12	1	n.a.	11	1.6736	0.0013	14	1.751	0.0003	1.0463	0.7063
75	12	1	n.a.	11	2.159	0.0013	14	2.1424	0.0027	0.9923	0.9567
76	11	1	n.a.	11	0.5121	0.0013	0	0	n.a.	0	n.a.
77	12	1	n.a.	11	1.8484	0.0014	14	1.7911	0.0023	0.969	0.7293
78	12	1	n.a.	9	0.5776	0.0015	13	0.5437	0	0.9414	0.6788
79	8	1	n.a.	10	2.7518	0.0015	14	2.663	0.002	0.9677	0.695
80	12	1	n.a.	10	0.7222	0.0015	13	0.7331	0.0068	1.0151	0.8928
81	12	1	n.a.	11	0.6923	0.0016	14	0.6205	0.0001	0.8963	0.3376
82	12	1	n.a.	11	0.7952	0.0016	14	0.9085	0.1205	1.1425	0.0377
83	12	1	n.a.	11	0.6298	0.0017	14	0.6492	0.0032	1.0309	0.7509
84	11	1	n.a.	11	0.7667	0.0017	14	0.7992	0.0013	1.0425	0.5685
85	12	1	n.a.	11	1.4841	0.0018	14	1.5394	0.0009	1.0372	0.4293
86	12	1	n.a.	11	0.7354	0.0019	14	0.7318	0.0134	0.9951	0.9674
87	12	1	n.a.	11	0.7558	0.002	14	0.8133	0.011	1.0761	0.1336
88	12	1	n.a.	9	1.4322	0.002	14	1.6345	0.0001	1.1413	0.2341
89	12	1	n.a.	11	1.3046	0.0021	14	1.3264	0.0005	1.0167	0.7845
90	12	1	n.a.	11	1.762	0.0022	13	1.7292	0.003	0.9813	0.8157
91	10	1	n.a.	9	0.5613	0.0022	12	0.7115	0.0208	1.2678	0.2013
92	9	1	n.a.	11	2.0182	0.0023	12	2.2367	0.0009	1.1082	0.3013
93	12	1	n.a.	11	0.6519	0.0024	14	0.5774	0.0003	0.8856	0.389
94	12	1	n.a.	11	0.5611	0.0024	14	0.7795	0.0782	1.3892	0.0789
95	11	1	n.a.	11	1.6166	0.0024	14	1.6091	0.0022	0.9954	0.9628
96	12	1	n.a.	11	1.4873	0.0025	12	1.4178	0.0016	0.9532	0.6156
97	12	1	n.a.	11	0.7782	0.0025	14	0.7888	0.007	1.0136	0.8249
98	12	1	n.a.	10	2.1941	0.0026	14	1.9863	0.0024	0.9053	0.6354
99	12	1	n.a.	11	0.7004	0.0027	14	0.6615	0.0007	0.9445	0.6382
100	11	1	n.a.	11	1.6658	0.0027	14	1.5709	0.0066	0.943	0.5498
101	12	1	n.a.	11	0.7016	0.0029	14	0.7965	0.045	1.1352	0.1952
102	12	1	n.a.	11	1.4966	0.0029	14	1.385	0.004	0.9254	0.4728
103	12	1	n.a.	11	1.8561	0.003	14	2.0804	0.0013	1.1209	0.4738
104	12	1	n.a.	11	1.3751	0.003	14	1.3445	0.0005	0.9778	0.8067
105	12	1	n.a.	10	0.5828	0.0031	14	0.5796	0.0039	0.9946	0.9767
106	12	1	n.a.	11	0.6906	0.0031	14	0.7495	0.0052	1.0854	0.3421
107	10	1	n.a.	11	0.5664	0.0031	14	0.5558	0.0037	0.9812	0.91
108	12	1	n.a.	11	0.8297	0.0031	14	0.859	0.0104	1.0353	0.2984
109	12	1	n.a.	11	0.7388	0.0038	14	0.7832	0.01	1.0601	0.4816
110	12	1	n.a.	11	0.6809	0.0038	14	0.8265	0.0244	1.2138	0.13
111	12	1	n.a.	11	0.6519	0.0042	14	0.6736	0.0017	1.0334	0.7745
112	11	1	n.a.	10	0.6687	0.0044	13	0.7557	0.0208	1.13	0.3983
113	12	1	n.a.	11	0.5753	0.0046	14	0.649	0.0153	1.1282	0.5022
114	12	1	n.a.	11	0.7239	0.0046	14	0.7083	0.0056	0.9785	0.8465
115	12	1	n.a.	10	1.5803	0.0048	13	1.4983	0.0042	0.9481	0.6443
116	12	1	n.a.	11	0.6641	0.0048	14	0.6776	0.0039	1.0203	0.8926
117	12	1	n.a.	11	1.6223	0.005	14	1.3207	0.1169	0.8141	0.0942
118	11	1	n.a.	11	1.2456	0.0053	14	1.1947	0.0828	0.9591	0.6654
119	12	1	n.a.	11	1.2424	0.0058	14	1.236	0.0053	0.9949	0.9316
120	12	1	n.a.	11	1.3142	0.0059	14	1.3021	0.002	0.9909	0.8984
121	12	1	n.a.	11	0.643	0.0059	14	0.6577	0.0107	1.0229	0.9014
122	12	1	n.a.	11	1.4924	0.0061	14	1.2209	0.174	0.8181	0.0826
123	12	1	n.a.	11	0.7573	0.0062	14	0.7517	0.0151	0.9926	0.9362
124	12	1	n.a.	11	0.6221	0.0065	14	0.6947	0.0188	1.1166	0.5301
125	10	1	n.a.	10	0.6033	0.0065	10	0.6983	0.0929	1.1574	0.4134
126	12	1	n.a.	11	1.5051	0.0066	14	1.3544	0.0679	0.8999	0.3934
127	12	1	n.a.	11	0.6888	0.0066	14	0.7958	0.0843	1.1555	0.2999
128	12	1	n.a.	11	0.7617	0.0072	14	0.7572	0.0057	0.9941	0.933
129	12	1	n.a.	11	0.7872	0.0076	14	0.8009	0.0069	1.0174	0.8109
130	11	1	n.a.	11	0.8309	0.0079	14	0.832	0.0059	1.0013	0.982
131	6	1	n.a.	9	1.6312	0.0079	13	1.585	0.0099	0.9716	0.7203
132	12	1	n.a.	11	0.6961	0.009	14	0.7176	0.0127	1.0309	0.7043
133	12	1	n.a.	11	0.7445	0.0091	14	0.7564	0.0114	1.0159	0.8682
134	12	1	n.a.	11	0.6479	0.0095	14	0.7341	0.0288	1.133	0.383
135	12	1	n.a.	11	1.3014	0.0096	14	1.2796	0.0054	0.9833	0.8254
136	11	1	n.a.	11	1.5654	0.01	14	1.5376	0.0095	0.9822	0.8325
137	12	1	n.a.	11	0.8012	0.01	14	0.8537	0.0766	1.0655	0.3944
138	12	1	n.a.	11	1.5327	0.0102	14	1.5101	0.0102	0.9853	0.9126
139	12	1	n.a.	10	0.7078	0.0107	13	0.6544	0.0001	0.9246	0.5456
140	12	1	n.a.	11	1.1602	0.0108	14	1.1985	0.0002	1.033	0.4844
141	3	1	n.a.	11	0.6676	0.0109	13	0.7883	0.0952	1.1808	0.2685
142	12	1	n.a.	11	1.6834	0.011	13	1.5352	0.0335	0.9119	0.5399
143	11	1	n.a.	11	2.3906	0.0112	12	1.3424	0.359	0.5616	0.0018
144	12	1	n.a.	11	0.8052	0.0113	14	0.8931	0.0934	1.1092	0.1744
145	9	1	n.a.	10	1.7723	0.0122	14	1.2136	0.3098	0.6847	0.0319
146	12	1	n.a.	10	0.5668	0.0123	14	0.4598	0.0008	0.8112	0.3421
147	12	1	n.a.	11	0.8205	0.0123	14	0.828	0.0939	1.0091	0.9317
148	12	1	n.a.	11	1.3894	0.0125	14	1.5134	0.0032	1.0892	0.2324
149	12	1	n.a.	11	1.8177	0.0126	12	1.3897	0.113	0.7645	0.0344
150	12	1	n.a.	11	0.7011	0.0127	14	0.6242	0.0008	0.8904	0.4207
151	12	1	n.a.	11	0.7518	0.0127	14	0.7242	0.006	0.9633	0.6667
153	12	1	n.a.	11	1.5848	0.0131	13	1.6154	0.0023	1.0194	0.8965
154	12	1	n.a.	11	0.7197	0.0132	14	0.7964	0.0725	1.1065	0.1773
155	11	1	n.a.	10	1.3915	0.0138	14	1.5443	0.0014	1.1098	0.295
157	12	1	n.a.	11	0.8753	0.014	13	0.9159	0.208	1.0464	0.535
158	12	1	n.a.	11	1.7375	0.014	14	1.3802	0.1206	0.7943	0.0233
159	12	1	n.a.	11	1.3952	0.0142	14	1.0332	0.7843	0.7405	0.001
160	12	1	n.a.	11	0.6706	0.0143	14	0.7743	0.0281	1.1545	0.2973
161	12	1	n.a.	11	0.7652	0.0157	14	0.7711	0.0084	1.0076	0.9417
162	12	1	n.a.	11	0.7969	0.0158	14	0.7722	0.0048	0.969	0.7249
163	12	1	n.a.	10	0.6416	0.0162	14	0.6885	0.0413	1.0732	0.6182
164	12	1	n.a.	11	1.3379	0.0164	14	1.4607	0.0055	1.0918	0.4177
165	12	1	n.a.	11	0.8381	0.0164	14	0.8831	0.0489	1.0537	0.3912
166	12	1	n.a.	11	0.7956	0.0179	14	0.8033	0.0164	1.0096	0.8956
167	11	1	n.a.	11	0.61	0.0179	14	0.6487	0.042	1.0634	0.6437
168	12	1	n.a.	11	1.1813	0.0187	14	1.1774	0.0149	0.9967	0.956
169	12	1	n.a.	11	0.5999	0.0191	13	0.8333	0.2931	1.389	0.104
170	6	1	n.a.	11	0.7707	0.0207	10	0.8484	0.1207	1.1008	0.1678
171	12	1	n.a.	11	0.7123	0.0214	14	0.6922	0.0465	0.9718	0.8587
172	12	1	n.a.	11	0.8638	0.0218	14	0.893	0.0304	1.0337	0.6089
173	11	1	n.a.	11	0.8203	0.022	13	0.7948	0.1784	0.9689	0.8478
174	12	1	n.a.	11	1.2927	0.0223	14	1.1882	0.1177	0.9191	0.1317
175	12	1	n.a.	11	1.2113	0.0225	13	1.3092	0.0017	1.0809	0.1842
176	12	1	n.a.	11	1.4294	0.0228	14	1.625	0.0008	1.1368	0.3264
177	12	1	n.a.	9	0.662	0.0229	14	0.5524	0.0004	0.8345	0.3471
178	12	1	n.a.	11	0.8504	0.0241	14	0.8941	0.0757	1.0514	0.5321
179	12	1	n.a.	11	0.7866	0.0243	13	0.6089	0.0004	0.7741	0.0315
180	12	1	n.a.	11	0.7838	0.0244	14	0.8767	0.2321	1.1186	0.2165
181	10	1	n.a.	11	0.6213	0.0253	14	0.6207	0.0232	0.999	0.992
182	12	1	n.a.	10	1.4196	0.0266	14	1.1413	0.2639	0.8039	0.0958
183	12	1	n.a.	9	0.6909	0.0267	12	0.8154	0.1057	1.1802	0.2913
184	12	1	n.a.	11	1.3199	0.0271	14	1.098	0.2367	0.8319	0.1026
185	11	1	n.a.	11	0.832	0.0273	14	0.8967	0.1748	1.0777	0.203
186	12	1	n.a.	11	0.8199	0.0275	14	0.847	0.0864	1.0331	0.668
187	12	1	n.a.	10	1.4595	0.0277	14	1.3782	0.0628	0.9443	0.6172
188	12	1	n.a.	9	0.6346	0.0277	10	0.6121	0.0186	0.9645	0.7992
189	12	1	n.a.	11	0.7918	0.0277	14	0.7687	0.0334	0.9709	0.8065
190	11	1	n.a.	10	0.775	0.0283	14	0.8233	0.0101	1.0624	0.5455
191	12	1	n.a.	11	0.7135	0.0305	14	0.7626	0.0906	1.0688	0.672
192	12	1	n.a.	11	0.7886	0.0314	14	0.7044	0.0136	0.8933	0.4168
193	12	1	n.a.	11	0.7593	0.0315	14	0.8137	0.0116	1.0716	0.5446
194	12	1	n.a.	9	0.7349	0.0322	13	0.6094	0.0007	0.8292	0.0969
195	11	1	n.a.	11	0.7301	0.0325	14	0.6652	0.0019	0.9111	0.4988
196	12	1	n.a.	11	0.7638	0.0326	14	0.8133	0.1569	1.0648	0.6644
197	10	1	n.a.	10	1.8214	0.035	13	1.3071	0.271	0.7176	0.1987
198	11	1	n.a.	11	0.7447	0.0351	13	0.6623	0.0008	0.8893	0.2949
199	12	1	n.a.	8	0.585	0.036	9	0.5787	0.0044	0.9894	0.9651
200	12	1	n.a.	11	1.452	0.036	14	1.4462	0.0367	0.996	0.9625
201	12	1	n.a.	11	0.7328	0.037	14	0.7705	0.0627	1.0514	0.7422
202	12	1	n.a.	8	0.6446	0.0371	12	0.4302	0	0.6674	0.0551
203	11	1	n.a.	11	0.8599	0.0371	14	0.9272	0.2383	1.0782	0.1649
204	12	1	n.a.	10	0.8666	0.0387	14	0.7986	0.0132	0.9215	0.3389
205	12	1	n.a.	11	0.771	0.0396	14	0.7321	0.007	0.9495	0.6135
206	12	1	n.a.	11	1.6623	0.0397	14	1.8933	0.0145	1.139	0.3466
207	12	1	n.a.	11	0.8134	0.0408	14	0.906	0.269	1.1139	0.1629
208	12	1	n.a.	11	0.7222	0.0428	14	0.7524	0.0867	1.0418	0.6875
209	12	1	n.a.	11	1.2277	0.0455	14	1.069	0.5566	0.8708	0.1864
210	12	1	n.a.	11	2.0522	0.0458	13	1.7357	0.114	0.8458	0.106
211	12	1	n.a.	11	1.3	0.0459	14	1.3844	0.03	1.065	0.4909
212	12	1	n.a.	11	0.7135	0.0463	14	0.7505	0.087	1.0517	0.7356
213	12	1	n.a.	11	0.875	0.0464	14	0.7843	0.0103	0.8963	0.2349
214	12	1	n.a.	11	1.1678	0.0479	14	1.123	0.0822	0.9616	0.5194
215	8	1	n.a.	11	1.3733	0.048	13	1.2416	0.2224	0.9041	0.4685
216	12	1	n.a.	11	0.7803	0.0485	13	0.613	0	0.7856	0.0401
217	12	1	n.a.	11	0.8783	0.0486	14	0.9576	0.4091	1.0903	0.0857
218	12	1	n.a.	11	1.3431	0.0487	14	1.2864	0.0861	0.9578	0.7579
220	12	1	n.a.	11	1.2601	0.049	14	1.2694	0.0558	1.0074	0.9138
222	12	1	n.a.	11	0.7291	0.1329	14	0.5648	0	0.7747	0.2425
223	12	1	n.a.	9	0.6631	0.0964	9	0.4507	0	0.6796	0.1309
224	12	1	n.a.	9	0.5474	0.028	11	0.4036	0.0001	0.7373	0.2243
225	9	1	n.a.	10	2.0606	0.0005	14	2.3039	0.0001	1.1181	0.324
226	11	1	n.a.	10	1.7099	0.01	14	1.7431	0.0049	1.0194	0.8674
227	12	1	n.a.	11	1.0168	0.879	14	0.8424	0.0048	0.8285	0.0849
229	12	1	n.a.	11	1.0869	0.2939	14	1.2405	0.0037	1.1414	0.0515
230	12	1	n.a.	10	0.5278	0.0093	13	0.469	0.0035	0.8886	0.4892
231	10	1	n.a.	8	0.7105	0.0801	8	0.462	0.0035	0.6503	0.0975
232	12	1	n.a.	11	1.0673	0.22	14	1.157	0.003	1.084	0.1252
233	12	1	n.a.	10	0.7458	0.0623	14	0.6867	0.003	0.9209	0.6148
234	8	1	n.a.	11	0.5455	0.0051	13	0.57	0.0025	1.0448	0.8221
235	11	1	n.a.	11	0.6767	0.052	14	0.5736	0.0023	0.8477	0.4436
236	12	1	n.a.	11	0.7447	0.0957	14	0.6631	0.0021	0.8904	0.4576
237	12	1	n.a.	11	1.0676	0.1949	14	1.2046	0.0018	1.1283	0.003
238	11	1	n.a.	10	0.4322	0.0015	12	0.5427	0.0015	1.2556	0.3238
239	12	1	n.a.	11	0.8469	0.0666	13	0.6457	0.0015	0.7625	0.0225
240	12	1	n.a.	11	0.8129	0.0901	14	0.6489	0.0015	0.7982	0.047
241	12	1	n.a.	10	0.8095	0.2503	14	0.5813	0.0011	0.718	0.1026
242	12	1	n.a.	11	1.1069	0.2566	14	1.3939	0.001	1.2593	0.0022
243	11	1	n.a.	10	0.7595	0.1269	13	0.6043	0.0008	0.7956	0.2386
244	12	1	n.a.	10	0.6952	0.0581	13	0.61	0.0006	0.8774	0.5024
245	12	1	n.a.	11	0.8934	0.1041	14	0.8106	0.0002	0.9073	0.1357
246	12	1	n.a.	11	1.2585	0.0706	14	1.3837	0.002	1.0995	0.3344
255	10	1	n.a.	0	0	n.a.	2	0.2739	0.0003	n.a.	n.a.
256	11	1	n.a.	0	0	n.a.	1	0.6946	n.a.	n.a.	n.a.
257	8	1	n.a.	0	0	n.a.	3	0.6594	0.0347	n.a.	n.a.
259	11	1	n.a.	0	0	n.a.	0	0	n.a.	0	n.a.
260	7	1	n.a.	0	0	n.a.	0	0	n.a.	0	n.a.
261	12	1	n.a.	0	0	n.a.	3	0.6746	0.2704	n.a.	n.a.
262	10	1	n.a.	0	0	n.a.	0	0	n.a.	0	n.a.
263	11	1	n.a.	0	0	n.a.	0	0	n.a.	0	n.a.
265	8	1	n.a.	0	0	n.a.	0	0	n.a.	0	n.a.
266	12	1	n.a.	0	0	n.a.	1	0.5336	n.a.	n.a.	n.a.
267	6	1	n.a.	0	0	n.a.	1	0.262	n.a.	n.a.	n.a.
268	11	1	n.a.	0	0	n.a.	0	0	n.a.	0	n.a.
269	6	1	n.a.	0	0	n.a.	0	0	n.a.	0	n.a.
270	9	1	n.a.	0	0	n.a.	0	0	n.a.	0	n.a.
271	11	1	n.a.	0	0	n.a.	5	0.7524	0.6312	n.a.	n.a.
272	12	1	n.a.	0	0	n.a.	0	0	n.a.	0	n.a.
273	12	1	n.a.	0	0	n.a.	0	0	n.a.	0	n.a.
274	10	1	n.a.	0	0	n.a.	0	0	n.a.	0	n.a.
275	7	1	n.a.	0	0	n.a.	0	0	n.a.	0	n.a.
276	11	1	n.a.	0	0	n.a.	0	0	n.a.	0	n.a.
277	11	1	n.a.	0	0	n.a.	0	0	n.a.	0	n.a.
278	6	1	n.a.	0	0	n.a.	1	0.4728	n.a.	n.a.	n.a.
279	6	1	n.a.	0	0	n.a.	0	0	n.a.	0	n.a.
280	11	1	n.a.	0	0	n.a.	1	0.719	n.a.	n.a.	n.a.
281	11	1	n.a.	0	0	n.a.	1	0.4483	n.a.	n.a.	n.a.
282	1	1	n.a.	0	0	n.a.	0	0	n.a.	0	n.a.
283	7	1	n.a.	0	0	n.a.	1	0.4283	n.a.	n.a.	n.a.
284	11	1	n.a.	0	0	n.a.	0	0	n.a.	0	n.a.
285	9	1	n.a.	0	0	n.a.	1	0.7458	n.a.	n.a.	n.a.
286	6	1	n.a.	0	0	n.a.	0	0	n.a.	0	n.a.
287	11	1	n.a.	0	0	n.a.	0	0	n.a.	0	n.a.
288	9	1	n.a.	0	0	n.a.	1	0.4646	n.a.	n.a.	n.a.
289	6	1	n.a.	0	0	n.a.	0	0	n.a.	0	n.a.
290	8	1	n.a.	0	0	n.a.	1	0.5744	n.a.	n.a.	n.a.
291	8	1	n.a.	0	0	n.a.	0	0	n.a.	0	n.a.
292	10	1	n.a.	0	0	n.a.	0	0	n.a.	0	n.a.
293	11	1	n.a.	0	0	n.a.	0	0	n.a.	0	n.a.
294	7	1	n.a.	0	0	n.a.	0	0	n.a.	0	n.a.
295	6	1	n.a.	0	0	n.a.	0	0	n.a.	0	n.a.
296	6	1	n.a.	0	0	n.a.	0	0	n.a.	0	n.a.
298	12	1	n.a.	0	0	n.a.	0	0	n.a.	0	n.a.
299	6	1	n.a.	0	0	n.a.	0	0	n.a.	0	n.a.
301	6	1	n.a.	0	0	n.a.	0	0	n.a.	0	n.a.
302	10	1	n.a.	0	0	n.a.	1	0.4693	n.a.	n.a.	n.a.
303	6	1	n.a.	0	0	n.a.	1	0.6247	n.a.	n.a.	n.a.
304	12	1	n.a.	0	0	n.a.	0	0	n.a.	0	n.a.
305	11	1	n.a.	0	0	n.a.	0	0	n.a.	0	n.a.
306	12	1	n.a.	0	0	n.a.	1	0.6322	n.a.	n.a.	n.a.
307	12	1	n.a.	0	0	n.a.	0	0	n.a.	0	n.a.
308	12	1	n.a.	0	0	n.a.	0	0	n.a.	0	n.a.
309	10	1	n.a.	0	0	n.a.	0	0	n.a.	0	n.a.
310	9	1	n.a.	0	0	n.a.	0	0	n.a.	0	n.a.
311	9	1	n.a.	0	0	n.a.	0	0	n.a.	0	n.a.
312	8	1	n.a.	0	0	n.a.	0	0	n.a.	0	n.a.
313	6	1	n.a.	0	0	n.a.	0	0	n.a.	0	n.a.
314	11	1	n.a.	0	0	n.a.	0	0	n.a.	0	n.a.
315	9	1	n.a.	0	0	n.a.	2	0.5487	0.0067	n.a.	n.a.
316	7	1	n.a.	0	0	n.a.	0	0	n.a.	0	n.a.
317	9	1	n.a.	0	0	n.a.	14	0.3867	0.011	n.a.	n.a.
318	7	1	n.a.	0	0	n.a.	9	0.2477	0.0166	n.a.	n.a.
319	9	1	n.a.	0	0	n.a.	2	0.5151	0.1739	n.a.	n.a.
320	6	1	n.a.	0	0	n.a.	2	0.6633	0.038	n.a.	n.a.
321	12	1	n.a.	0	0	n.a.	0	0	n.a.	0	n.a.
322	11	1	n.a.	0	0	n.a.	7	0.5214	0.0138	n.a.	n.a.
323	6	1	n.a.	0	0	n.a.	0	0	n.a.	0	n.a.
324	6	1	n.a.	0	0	n.a.	1	0.1541	n.a.	n.a.	n.a.
325	6	1	n.a.	0	0	n.a.	0	0	n.a.	0	n.a.
326	6	1	n.a.	0	0	n.a.	0	0	n.a.	0	n.a.
327	6	1	n.a.	0	0	n.a.	0	0	n.a.	0	n.a.
328	12	1	n.a.	0	0	n.a.	11	0.7166	0.0177	n.a.	n.a.
329	6	1	n.a.	0	0	n.a.	0	0	n.a.	0	n.a.
330	9	1	n.a.	0	0	n.a.	1	0.37	n.a.	n.a.	n.a.
331	12	1	n.a.	0	0	n.a.	0	0	n.a.	0	n.a.
332	11	1	n.a.	0	0	n.a.	0	0	n.a.	0	n.a.
333	10	1	n.a.	0	0	n.a.	0	0	n.a.	0	n.a.
334	10	1	n.a.	0	0	n.a.	0	0	n.a.	0	n.a.
335	8	1	n.a.	0	0	n.a.	0	0	n.a.	0	n.a.
336	7	1	n.a.	0	0	n.a.	0	0	n.a.	0	n.a.
337	9	1	n.a.	0	0	n.a.	0	0	n.a.	0	n.a.
338	9	1	n.a.	0	0	n.a.	0	0	n.a.	0	n.a.
339	9	1	n.a.	0	0	n.a.	0	0	n.a.	0	n.a.
340	7	1	n.a.	0	0	n.a.	0	0	n.a.	0	n.a.
341	7	1	n.a.	0	0	n.a.	0	0	n.a.	0	n.a.
342	8	1	n.a.	0	0	n.a.	0	0	n.a.	0	n.a.
343	6	1	n.a.	0	0	n.a.	0	0	n.a.	0	n.a.
344	7	1	n.a.	0	0	n.a.	0	0	n.a.	0	n.a.
345	6	1	n.a.	0	0	n.a.	0	0	n.a.	0	n.a.
346	6	1	n.a.	0	0	n.a.	0	0	n.a.	0	n.a.
347	8	1	n.a.	0	0	n.a.	0	0	n.a.	0	n.a.
348	5	1	n.a.	0	0	n.a.	0	0	n.a.	0	n.a.
349	6	1	n.a.	0	0	n.a.	0	0	n.a.	0	n.a.
350	11	1	n.a.	0	0	n.a.	3	0.6363	0.37	n.a.	n.a.
351	8	1	n.a.	0	0	n.a.	0	0	n.a.	0	n.a.
352	12	1	n.a.	0	0	n.a.	13	0.738	0.0005	n.a.	n.a.
353	11	1	n.a.	0	0	n.a.	0	0	n.a.	0	n.a.
354	8	1	n.a.	0	0	n.a.	1	0.6641	n.a.	n.a.	n.a.
355	8	1	n.a.	0	0	n.a.	0	0	n.a.	0	n.a.
356	6	1	n.a.	0	0	n.a.	0	0	n.a.	0	n.a.
357	6	1	n.a.	0	0	n.a.	0	0	n.a.	0	n.a.
358	6	1	n.a.	0	0	n.a.	0	0	n.a.	0	n.a.
359	6	1	n.a.	0	0	n.a.	0	0	n.a.	0	n.a.
360	6	1	n.a.	0	0	n.a.	0	0	n.a.	0	n.a.
361	6	1	n.a.	0	0	n.a.	0	0	n.a.	0	n.a.
362	7	1	n.a.	0	0	n.a.	0	0	n.a.	0	n.a.
363	8	1	n.a.	0	0	n.a.	0	0	n.a.	0	n.a.
364	8	1	n.a.	0	0	n.a.	0	0	n.a.	0	n.a.
365	8	1	n.a.	0	0	n.a.	1	0.6614	n.a.	n.a.	n.a.
366	7	1	n.a.	0	0	n.a.	2	0.3053	0.0217	n.a.	n.a.
367	10	1	n.a.	0	0	n.a.	0	0	n.a.	0	n.a.
368	6	1	n.a.	0	0	n.a.	0	0	n.a.	0	n.a.
369	6	1	n.a.	0	0	n.a.	0	0	n.a.	0	n.a.
370	9	1	n.a.	0	0	n.a.	1	0.5486	n.a.	n.a.	n.a.
371	12	1	n.a.	0	0	n.a.	0	0	n.a.	0	n.a.
372	9	1	n.a.	0	0	n.a.	0	0	n.a.	0	n.a.
373	6	1	n.a.	0	0	n.a.	0	0	n.a.	0	n.a.
374	10	1	n.a.	0	0	n.a.	2	0.6296	0.0268	n.a.	n.a.
375	9	1	n.a.	0	0	n.a.	0	0	n.a.	0	n.a.
376	7	1	n.a.	0	0	n.a.	0	0	n.a.	0	n.a.
377	12	1	n.a.	0	0	n.a.	0	0	n.a.	0	n.a.
378	12	1	n.a.	0	0	n.a.	0	0	n.a.	0	n.a.
379	11	1	n.a.	0	0	n.a.	0	0	n.a.	0	n.a.
380	10	1	n.a.	0	0	n.a.	0	0	n.a.	0	n.a.
381	11	1	n.a.	0	0	n.a.	0	0	n.a.	0	n.a.
382	10	1	n.a.	0	0	n.a.	1	0.7443	n.a.	n.a.	n.a.
383	7	1	n.a.	0	0	n.a.	0	0	n.a.	0	n.a.
384	7	1	n.a.	0	0	n.a.	0	0	n.a.	0	n.a.
385	7	1	n.a.	0	0	n.a.	0	0	n.a.	0	n.a.
386	7	1	n.a.	0	0	n.a.	0	0	n.a.	0	n.a.
387	6	1	n.a.	0	0	n.a.	0	0	n.a.	0	n.a.
388	7	1	n.a.	0	0	n.a.	3	0.3292	0.001	n.a.	n.a.
389	12	1	n.a.	0	0	n.a.	6	0.4673	0.0011	n.a.	n.a.
390	12	1	n.a.	0	0	n.a.	5	0.2294	0.0361	n.a.	n.a.
391	6	1	n.a.	0	0	n.a.	0	0	n.a.	0	n.a.
392	7	1	n.a.	0	0	n.a.	0	0	n.a.	0	n.a.
393	11	1	n.a.	0	0	n.a.	14	0.602	0.0071	n.a.	n.a.
394	10	1	n.a.	0	0	n.a.	1	0.3677	n.a.	n.a.	n.a.
395	7	1	n.a.	0	0	n.a.	0	0	n.a.	0	n.a.
396	10	1	n.a.	0	0	n.a.	4	0.6728	0.0376	n.a.	n.a.
397	6	1	n.a.	0	0	n.a.	0	0	n.a.	0	n.a.
398	6	1	n.a.	0	0	n.a.	0	0	n.a.	0	n.a.
399	6	1	n.a.	0	0	n.a.	0	0	n.a.	0	n.a.
400	6	1	n.a.	0	0	n.a.	0	0	n.a.	0	n.a.
401	8	1	n.a.	0	0	n.a.	0	0	n.a.	0	n.a.
402	10	1	n.a.	0	0	n.a.	11	0.2032	0	n.a.	n.a.
403	11	1	n.a.	0	0	n.a.	0	0	n.a.	0	n.a.
405	9	1	n.a.	4	0.1718	0.0073	1	0.2257	n.a.	1.3137	n.a.
406	9	1	n.a.	9	0.1813	0.001	7	0.2956	0.0168	1.6304	0.2437
407	12	1	n.a.	7	0.2717	0.0007	11	0.421	0.0183	1.5496	0.1627
408	10	1	n.a.	9	0.2801	0.0004	13	0.3327	0.0001	1.188	0.5453
409	12	1	n.a.	1	0.3046	n.a.	0	0	n.a.	0	n.a.
410	9	1	n.a.	2	0.3188	0.0301	0	0	n.a.	0	n.a.
411	10	1	n.a.	1	0.3193	n.a.	0	0	n.a.	0	n.a.
412	11	1	n.a.	8	0.3382	0.0001	12	0.306	0	0.9048	0.663
413	9	1	n.a.	6	0.3406	0.0182	6	0.341	0.0001	1.0011	0.9976
414	11	1	n.a.	5	0.3424	0.0026	4	0.4956	0.0114	1.4476	0.1698
415	6	1	n.a.	2	0.3425	0.1245	0	0	n.a.	0	n.a.
416	10	1	n.a.	9	0.3667	0.0009	0	0	n.a.	0	n.a.
417	10	1	n.a.	7	0.3937	0.0202	13	0.4239	0.0027	1.0765	0.8446
418	10	1	n.a.	11	0.3987	0	10	0.449	0.0001	1.1263	0.5044
419	12	1	n.a.	11	0.4044	0.0001	14	0.4404	0	1.0892	0.6258
420	12	1	n.a.	3	0.4279	0.0007	0	0	n.a.	0	n.a.
421	11	1	n.a.	9	0.4297	0.0008	0	0	n.a.	0	n.a.
422	11	1	n.a.	9	0.4642	0.0007	0	0	n.a.	0	n.a.
423	8	1	n.a.	10	0.4686	0.0016	0	0	n.a.	0	n.a.
424	11	1	n.a.	10	0.4817	0.0007	12	0.3923	0	0.8144	0.2136
425	10	1	n.a.	8	0.4929	0.0731	11	0.3764	0.0124	0.7636	0.4844
426	11	1	n.a.	10	0.498	0.0111	12	0.5395	0.0303	1.0834	0.6628
427	12	1	n.a.	11	0.5289	0.0009	13	0.5334	0.0005	1.0086	0.9579
428	10	1	n.a.	9	0.5337	0.003	9	0.6821	0.0094	1.2781	0.2034
429	10	1	n.a.	4	0.5348	0.01	7	0.5719	0.0185	1.0694	0.7645
430	12	1	n.a.	6	0.5389	0.0004	10	0.4829	0.0001	0.8959	0.2078
431	12	1	n.a.	11	0.5604	0.0135	13	0.6483	0.0414	1.1568	0.551
432	9	1	n.a.	9	0.5655	0.0055	10	0.5037	0.0007	0.8908	0.4816
433	12	1	n.a.	11	0.566	0.0001	12	0.4924	0	0.87	0.2388
434	9	1	n.a.	7	0.5662	0.0007	9	0.5956	0.0009	1.0518	0.7087
435	11	1	n.a.	11	0.5714	0.0025	13	0.6339	0.0011	1.1094	0.5298
436	10	1	n.a.	10	0.5719	0.0013	14	0.5975	0.0026	1.0447	0.7799
437	12	1	n.a.	8	0.5776	0.001	14	0.5889	0.0003	1.0195	0.887
438	12	1	n.a.	11	0.5805	0.0416	13	0.5783	0.0179	0.9961	0.9836
439	11	1	n.a.	7	0.5855	0.002	10	0.6161	0.0108	1.0522	0.7674
440	12	1	n.a.	10	0.5945	0.0002	14	0.5047	0	0.849	0.0268
441	12	1	n.a.	4	0.6018	0.018	9	0.5102	0.0001	0.8477	0.3491
443	12	1	n.a.	0	0	n.a.	0	0	n.a.	0	n.a.
444	9	1	n.a.	0	0	n.a.	5	0.5176	0.0009	n.a.	n.a.
445	7	1	n.a.	0	0	n.a.	0	0	n.a.	0	n.a.
446	6	1	n.a.	0	0	n.a.	1	0.6905	n.a.	n.a.	n.a.
247a	12	1	n.a.	11	1.1208	0.0838	14	1.0097	0.7936	0.9009	0.0929
247b	12	1	n.a.	11	1.1208	0.0838	14	1.0097	0.7936	0.9009	0.0929
248a	1	1	n.a.	10	1.2249	N.A.	13	1.1811	n.a.	0.9643	0.7167
248b	1	1	n.a.	10	1.2249	N.A.	13	1.1811	n.a.	0.9643	0.7167
249a	12	1	n.a.	11	0.9511	0.6912	14	0.896	0.1704	0.9421	0.6357
249b	12	1	n.a.	11	0.9511	0.6912	14	0.896	0.1704	0.9421	0.6357
250a	12	1	n.a.	11	1.1456	0.1031	14	1.1189	0.1238	0.9767	0.6811
250b	12	1	n.a.	11	1.1456	0.1031	14	1.1189	0.1238	0.9767	0.6811
251a	12	1	n.a.	11	0.9217	0.314	14	0.98	0.8011	1.0633	0.3518
251b	12	1	n.a.	11	0.9217	0.314	14	0.98	0.8011	1.0633	0.3518
252a	12	1	n.a.	11	1.015	0.8389	14	1.03	0.7123	1.0148	0.7896
252b	12	1	n.a.	11	1.015	0.8389	14	1.03	0.7123	1.0148	0.7896
253a	0	1	n.a.	9	N.A.	N.A.	10	N.A.	n.a.	1.0928	0.1413
253b	0	1	n.a.	9	N.A.	N.A.	10	N.A.	n.a.	1.0928	0.1413
254a	12	1	n.a.	11	1.0712	0.4606	14	1.1808	0.091	1.1023	0.0733
254b	12	1	n.a.	11	1.0712	0.4606	14	1.1808	0.091	1.1023	0.0733

## Sheet: MS results
MS results of all 487 spots
Spot ID	pI observed	MW observed	Gene name	Protein name	Entrez name	matched peptides (unique)	sequence coverage	MW theoretical	LFQ intensity [%]	MS MS counts
1	6.5	60	Cct2	T-complex protein 1 subunit beta	TCPB_MOUSE	24	52.9	57.477	87.4053	88
59	7.5	43	Akr1b1	Aldose reductase	ALDR_MOUSE	16	47.2	35.732	82.6363	47
79	7.9	43	Akr1a1	Alcohol dehydrogenase [NADP(+)]	AK1A1_MOUSE	10	29.8	36.586	77.0129	21
247a	8.5	50	Ndufv1	NADH dehydrogenase [ubiquinone] flavoprotein 1, mitochondrial	NDUV1_MOUSE	18	43.5	50.834	86.6335	53
247b	8.5	50	Ndufv1	NADH dehydrogenase [ubiquinone] flavoprotein 1, mitochondrial	NDUV1_MOUSE	18	38.6	50.834	96.512	51
248a	8.2	50	Ckmt1	Creatine kinase U-type, mitochondrial	KCRU_MOUSE	8	27	47.003	71.3625	22
248b	8.2	50	Ass1	Argininosuccinate synthase	ASSY_MOUSE	11	22.8	46.584	55.5376	29
248b	8.2	50	Ckmt1	Creatine kinase U-type, mitochondrial	KCRU_MOUSE	9	33.5	47.003	25.531	19
249a	8.6	45	Aldoa	Fructose-bisphosphate aldolase A	ALDOA_MOUSE	16	54.1	39.355	86.4782	41
249b	8.6	45	Aldoa	Fructose-bisphosphate aldolase A	ALDOA_MOUSE	9	36.3	39.355	69.743	26
250a	7.8	37	Vdac1	Voltage-dependent anion-selective channel protein 1	VDAC1_MOUSE	16	68.6	30.755	94.4771	40
250b	7.8	37	Arpc2	Actin-related protein 2/3 complex subunit 2	ARPC2_MOUSE	14	43.3	34.357	71.0935	32
250b	7.8	37	Vdac1	Voltage-dependent anion-selective channel protein 1	VDAC1_MOUSE	10	55.1	30.755	15.6638	20
251a	6.4	38	Psmd14	26S proteasome non-ATPase regulatory subunit 14	PSDE_MOUSE	8	32.9	34.577	74.3643	16
251b	6.4	38	Psmd14	26S proteasome non-ATPase regulatory subunit 14	PSDE_MOUSE	10	39.7	34.577	93.6974	30
252a	7.7	25	Sod2	Superoxide dismutase [Mn], mitochondrial	SODM_MOUSE	9	45	24.603	98.6822	36
252b	7.7	25	Sod2	Superoxide dismutase [Mn], mitochondrial	SODM_MOUSE	6	35.1	24.603	90.7057	26
253a	8.3	22	Ran	GTP-binding nuclear protein Ran	RAN_MOUSE	11	45.4	24.423	92.4833	42
253b	8.3	22	Ran	GTP-binding nuclear protein Ran	RAN_MOUSE	11	45.4	24.423	90.7818	44
254a	6.2	27	Prdx6	Peroxiredoxin-6	PRDX6_MOUSE	11	50.4	24.87	88.3979	31
254b	6.2	27	Prdx6	Peroxiredoxin-6	PRDX6_MOUSE	15	62.1	24.87	94.2282	58
2	6.2	52	Hspa8	Heat shock cognate 71 kDa protein	HSP7C_MOUSE	15	31	70.87	36.2468	36
2	6.2	52	Aldoa	Fructose-bisphosphate aldolase A	ALDOA_MOUSE	10	38.7	39.355	32.4275	26
3	7.9	52	Abat	4-aminobutyrate aminotransferase, mitochondrial	GABT_MOUSE	9	20.4	56.451	49.449	16
4	7.2	45	Aldoc	Fructose-bisphosphate aldolase C	ALDOC_MOUSE	16	52.9	39.394	26.4625	28
4	7.2	45	Sept3	Neuronal-specific septin-3	SEPT3_MOUSE	15	42.1	38.709	25.3118	28
5	9.3	45	Aldoa	Fructose-bisphosphate aldolase A	ALDOA_MOUSE	11	44	39.355	52.8746	25
6	10.2	30	Nipsnap1	Protein NipSnap homolog 1	NIPS1_MOUSE	5	16.5	33.363	78.4784	24
7	9.8	70	Pabpc1	Polyadenylate-binding protein 1	PABP1_MOUSE	22	31.8	70.67	94.5069	66
8	6.3	42	Nif3l1	Putative GTP cyclohydrolase 1 type 2 Nif3l1	GTPC1_MOUSE	11	30.3	41.745	14.7242	28
8	6.3	42	Rnf181	E3 ubiquitin-protein ligase RNF181	RN181_MOUSE	1	6.8	13.598	67.7845	3
9	6.1	60	Ehd3	EH domain-containing protein 3	EHD3_MOUSE	22	49.5	60.82	19.9943	64
9	6.1	60	Rnf181	E3 ubiquitin-protein ligase RNF181	RN181_MOUSE	1	6.8	13.598	64.8947	7
10	7.4	70	Nsf	Vesicle-fusing ATPase	NSF_MOUSE	21	30.2	82.613	6.8721	42
11	5.2	32	Atp5b	ATP synthase subunit beta, mitochondrial	ATPB_MOUSE	11	26.3	56.3	55.4894	55
12	10	47	Slc25a22	Mitochondrial glutamate carrier 1	GHC1_MOUSE	8	27.6	34.67	67.2524	22
13	7	48	Prdx6	Peroxiredoxin-6	PRDX6_MOUSE	14	61.2	24.87	73.8911	40
14	7.1	36	Mpst	3-mercaptopyruvate sulfurtransferase	THTM_MOUSE	12	48.5	33.023	53.3945	37
14	7.1	36	Etfa	Electron transfer flavoprotein subunit alpha, mitochondrial	ETFA_MOUSE	10	40.5	35.009	44.9088	29
15	7.1	42	Hibch	3-hydroxyisobutyryl-CoA hydrolase, mitochondrial	HIBCH_MOUSE	8	23.6	43.037	45.5808	20
16	5.6	46	Actg1	Actin, cytoplasmic 2	ACTG_MOUSE	7	21.9	41.792	20.8964	19
16	5.6	46	Necap1	Adaptin ear-binding coat-associated protein 1	NECP1_MOUSE	6	37.1	29.639	13.5277	12
17	6.3	47	Ndufa10	NADH dehydrogenase [ubiquinone] 1 alpha subcomplex subunit 10, mitochondrial	NDUAA_MOUSE	13	43.7	40.603	87.1294	39
18	10.5	40	Suclg1	Succinyl-CoA ligase [ADP/GDP-forming] subunit alpha, mitochondrial	SUCA_MOUSE	8	28.3	36.154	38.893	34
19	5.8	58	Hnrnph1	Heterogeneous nuclear ribonucleoprotein H	HNRH1_MOUSE	5	14.7	49.199	27.3385	17
20	10	48	Atp5a1	ATP synthase subunit alpha, mitochondrial	ATPA_MOUSE	9	16.8	59.752	29.7932	22
21	6.8	46	Ndufa10	NADH dehydrogenase [ubiquinone] 1 alpha subcomplex subunit 10, mitochondrial	NDUAA_MOUSE	10	38.6	40.603	59.4273	32
22	8.1	55	Abat	4-aminobutyrate aminotransferase, mitochondrial	GABT_MOUSE	13	34.2	56.451	5.2384	38
23	8.8	40	Hnrnpa2b1	Heterogeneous nuclear ribonucleoproteins A2/B1	ROA2_MOUSE	14	50.7	35.979	50.5917	35
24	8	36	Vdac1	Voltage-dependent anion-selective channel protein 1	VDAC1_MOUSE	9	48.4	30.755	52.2308	20
25	7.8	70	Syn2	Synapsin-2	SYN2_MOUSE	16	46.1	63.372	90.6917	60
26	5.5	46	Serpinb6	Serpin B6	SPB6_MOUSE	9	24.1	42.598	48.3538	20
27	9.8	40	Sfxn1	Sideroflexin-1	SFXN1_MOUSE	9	34.8	35.649	82.8969	26
28	6	51	Oat	Ornithine aminotransferase, mitochondrial	OAT_MOUSE	15	41.7	48.354	87.5841	44
29	9.8	36	Hnrnpa0	Heterogeneous nuclear ribonucleoprotein A0	ROA0_MOUSE	4	19.3	30.53	64.4856	11
31	5	32	Atp5b	ATP synthase subunit beta, mitochondrial	ATPB_MOUSE	11	26.3	56.3	26.6692	34
32	8.8	38	Hadh	Hydroxyacyl-coenzyme A dehydrogenase, mitochondrial	HCDH_MOUSE	5	19.4	34.463	81.919	9
33	5.5	39	Pdhb	Pyruvate dehydrogenase E1 component subunit beta, mitochondrial	ODPB_MOUSE	10	34.5	38.937	52.9969	28
33	5.5	39	Napb	Beta-soluble NSF attachment protein	SNAB_MOUSE	12	50.7	33.557	32.2194	28
34	4.7	85	Hsp90ab1	Heat shock protein HSP 90-beta	HS90B_MOUSE	12	19.3	83.28	40.7886	44
34	4.7	85	Bin1	Myc box-dependent-interacting protein 1	BIN1_MOUSE	12	24.7	64.469	29.1629	35
35	7.8	65	Dpysl4	Dihydropyrimidinase-related protein 4	DPYL4_MOUSE	21	51.7	61.961	73.7632	52
36	6.5	80	Opa1	Dynamin-like 120 kDa protein, mitochondrial	OPA1_MOUSE	29	35.2	111.34	88.6866	74
37	6.5	70	Dpysl2	Dihydropyrimidinase-related protein 2	DPYL2_MOUSE	20	51.7	62.277	63.2059	41
38	7.5	30	Ca2	Carbonic anhydrase 2	CAH2_MOUSE	10	61.5	29.032	45.1726	19
38	7.5	30	Qdpr	Dihydropteridine reductase	DHPR_MOUSE	10	52.7	25.57	44.0435	50
39	7.2	53	Pa2g4	Proliferation-associated protein 2G4	PA2G4_MOUSE	11	34.8	43.698	44.292	25
40	6.4	53	Eno1	Alpha-enolase	ENOA_MOUSE	16	49.5	47.14	73.3729	50
41	6.7	72	Dnm1l	Dynamin-1-like protein	DNM1L_MOUSE	22	35.4	82.657	70.0812	47
42	5.2	55	Nefl	Neurofilament light polypeptide	NFL_MOUSE	11	21.2	61.508	23.7071	20
42	5.2	55	Homer1	Homer protein homolog 1	HOME1_MOUSE	15	47.5	41.412	13.9759	28
43	10.2	55	Hadhb	Trifunctional enzyme subunit beta, mitochondrial	ECHB_MOUSE	15	28.6	51.386	88.93	36
44	7.3	47	Pgk1	Phosphoglycerate kinase 1	PGK1_MOUSE	11	28.3	44.55	88.2461	36
45	7.2	80	Mthfd1	C-1-tetrahydrofolate synthase, cytoplasmic	C1TC_MOUSE	34	39.6	101.2	85.6016	87
46	8.9	37	Aldoa	Fructose-bisphosphate aldolase A	ALDOA_MOUSE	11	45.3	39.355	69.3345	23
47	8.5	75	Pfkm	ATP-dependent 6-phosphofructokinase, muscle type	PFKAM_MOUSE	28	46.9	85.268	89.0338	89
48	10	34	Vdac3	Voltage-dependent anion-selective channel protein 3	VDAC3_MOUSE	8	39.2	30.752	91.3251	35
49	4.8	75	Bin1	Myc box-dependent-interacting protein 1	BIN1_MOUSE	12	24.7	64.469	54.603	41
50	7	40	Grhpr	Glyoxylate reductase/hydroxypyruvate reductase	GRHPR_MOUSE	9	28.7	35.328	58.2019	27
50	7	40	Taldo1	Transaldolase	TALDO_MOUSE	11	31.5	37.387	27.2	34
51	7.5	45	Aldoc	Fructose-bisphosphate aldolase C	ALDOC_MOUSE	23	72.2	39.394	66.837	50
51	7.5	45	Got1	Aspartate aminotransferase, cytoplasmic	AATC_MOUSE	16	46.7	46.247	29.8594	41
52	7	42	Sirt2	NAD-dependent protein deacetylase sirtuin-2	SIR2_MOUSE	12	36.4	39.553	54.0009	28
53	6.5	68	Pcca	Propionyl-CoA carboxylase alpha chain, mitochondrial	PCCA_MOUSE	29	50.7	79.921	49.3436	110
53	6.5	68	Nsf	Vesicle-fusing ATPase	NSF_MOUSE	27	37.6	82.613	26.6595	71
54	7.2	54	Pdha1	Pyruvate dehydrogenase E1 component subunit alpha, somatic form, mitochondrial	ODPA_MOUSE	8	21.8	43.231	28.0908	17
54	7.2	54	Atp5a1	ATP synthase subunit alpha, mitochondrial	ATPA_MOUSE	10	20.8	59.752	16.5611	19
55	5.2	100	Hspa4	Heat shock 70 kDa protein 4	HSP74_MOUSE	33	52.8	94.132	73.6867	122
56	9.5	34	dr39u1	Epimerase family protein SDR39U1	D39U1_MOUSE	8	33.8	31.458	88.3906	27
57	10	47	Hnrnpa3	Heterogeneous nuclear ribonucleoprotein A3	ROA3_MOUSE	11	32.2	39.652	75.3041	44
58	9.5	57	Pdha1	Pyruvate dehydrogenase E1 component subunit alpha, somatic form, mitochondrial	ODPA_MOUSE	11	29	43.231	37.21	27
58	9.5	57	Mapt	Microtubule-associated protein tau	TAU_MOUSE;	8	28.5	38.96	23.5182	30
60	7.8	80	Aco2	Aconitate hydratase, mitochondrial	ACON_MOUSE	22	30.6	85.462	52.691	49
61	5.9	70	Gars	Glycine--tRNA ligase	SYG_MOUSE	20	28.8	81.877	69.8832	44
62	8	70	Aifm1	Apoptosis-inducing factor 1, mitochondrial	AIFM1_MOUSE	21	43.5	66.765	80.8386	67
63	8.2	38	Mgll	Monoglyceride lipase	MGLL_MOUSE	9	34	33.387	50.8597	36
63	8.2	38	Mdh2	Malate dehydrogenase, mitochondrial	MDHM_MOUSE	10	38.8	35.611	28.6234	29
64	5.3	100	Hspa4	Heat shock 70 kDa protein 4	HSP74_MOUSE	33	51.8	94.132	79.3821	103
65	4.8	80	Bin1	Myc box-dependent-interacting protein 1	BIN1_MOUSE	18	33.3	64.469	71.9626	47
66	4.9	53	Psmc1	26S protease regulatory subunit 4	PRS4_MOUSE	14	36.8	49.184	63.5078	42
67	5.9	62	Pdia3	Protein disulfide-isomerase A3	PDIA3_MOUSE	28	54.7	56.678	83.6678	92
68	6.9	82	Dnm1	Dynamin-1	DYN1_MOUSE	2	2.6	95.926	75.4984	123
69	7.2	90	Ogdh	2-oxoglutarate dehydrogenase, mitochondrial	ODO1_MOUSE	33	41.5	117.76	91.286	82
70	4.8	90	Rnf181	E3 ubiquitin-protein ligase RNF181	RN181_MOUSE	1	6.8	13.598	100	11
71	9.5	44	Kcnab2	Voltage-gated potassium channel subunit beta-2	KCAB2_MOUSE	10	30.5	41.021	77.2183	41
73	5.7	70	Dpysl3	Dihydropyrimidinase-related protein 3	DPYL3_MOUSE	13	38.4	61.936	64.1204	35
74	5.3	65	Usp14	Ubiquitin carboxyl-terminal hydrolase 14	UBP14_MOUSE	16	37.5	56.001	29.8091	39
75	5.8	40	Pkm	Pyruvate kinase PKM	KPYM_MOUSE	10	23	57.984	48.5781	20
75	5.8	40	Taldo1	Transaldolase	TALDO_MOUSE	10	25.5	37.387	21.2451	25
76	7.6	90	Snd1	Staphylococcal nuclease domain-containing protein 1	SND1_MOUSE	32	40.1	102.09	88.8174	91
77	5.9	25	Grb2	Growth factor receptor-bound protein 2	GRB2_MOUSE	15	60.8	25.238	75.0643	43
78	7.8	76	Aco2	Aconitate hydratase, mitochondrial	ACON_MOUSE	19	26.5	85.462	63.9437	52
80	4.7	50	Actb	Actin, cytoplasmic 1	ACTB_MOUSE	5	18.7	41.736	46.7464	41
80	4.7	50	Ndrg2	Protein NDRG2	NDRG2_MOUSE	10	42.6	39.28	28.8555	30
81	8.2	75	Pfkm	ATP-dependent 6-phosphofructokinase, muscle type	PFKAM_MOUSE	24	39.9	85.268	94.2097	80
82	9.4	36	Atp5c1	ATP synthase subunit gamma, mitochondrial	ATPG_MOUSE	11	32.9	32.886	95.462	49
83	9.7	28	Mdh1	Malate dehydrogenase, cytoplasmic	MDHC_MOUSE	7	24.6	36.511	70.2563	20
84	9.7	47	Got2	Aspartate aminotransferase, mitochondrial	AATM_MOUSE	21	47.9	47.411	96.5181	57
85	7.7	43	Hspa8	Heat shock cognate 71 kDa protein	HSP7C_MOUSE	16	28.6	70.87	79.9975	91
86	4.6	16	Snca	Alpha-synuclein	SYUA_MOUSE	8	72.9	14.485	98.6773	38
87	7.3	62	Cyp1a2	Cytochrome P450 1A2	CP1A2_MOUSE	1	1.6	58.183	70.4244	1
87	7.3	62	Crmp1	Dihydropyrimidinase-related protein 1	DPYL1_MOUSE	20	46.9	62.167	14.0146	50
88	7.7	22	Lypla2	Acyl-protein thioesterase 2	LYPA2_MOUSE	4	18.2	24.794	64.6877	12
89	5.8	53	Tubb4b	Tubulin beta-4B chain	TBB4B_MOUSE	4	16	49.83	29.6801	43
89	5.8	53	Gdi2	Rab GDP dissociation inhibitor beta	GDIB_MOUSE	15	38	50.537	19.2666	35
90	5.5	40	Cops6	COP9 signalosome complex subunit 6	CSN6_MOUSE	11	44.8	35.88	53.7559	33
91	5.7	50	Ndrg2	Protein NDRG2	NDRG2_MOUSE	12	44.8	39.28	44.5616	35
91	5.7	50	Actg1	Actin, cytoplasmic 2	ACTG_MOUSE	4	16.5	41.792	34.4242	33
92	9.8	70	Pabpc1	Polyadenylate-binding protein 1	PABP1_MOUSE	24	38.7	70.67	91.5575	63
93	8.3	46	Hnrnpa3	Heterogeneous nuclear ribonucleoprotein A3	ROA3_MOUSE	12	31.7	37.086	72.0304	40
94	9.9	17	Arpc3	Actin-related protein 2/3 complex subunit 3	ARPC3_MOUSE	5	32.6	20.524	90.6785	24
95	7	30	Pgam1	Phosphoglycerate mutase 1	PGAM1_MOUSE	11	47.2	28.832	90.6196	30
96	7.8	50	Cltc	Clathrin heavy chain 1	CLH1_MOUSE	18	13.4	191.55	61.1191	56
97	5.9	57	Dlst	Dihydrolipoyllysine-residue succinyltransferase component of 2-oxoglutarate dehydrogenase complex, mitochondrial	ODO2_MOUSE	12	36.1	48.994	63.0838	56
98	7.7	49	Gapdh	Glyceraldehyde-3-phosphate dehydrogenase	G3P_MOUSE	12	38.1	35.81	85.2957	42
99	4.7	35	Tpm3	Tropomyosin alpha-3 chain	TPM3_MOUSE	8	25	29.02	97.3625	78
100	7	27	Gstm5	Glutathione S-transferase Mu 5	GSTM5_MOUSE	12	52.7	26.635	92.9859	43
101	6.8	62	Ehd3	EH domain-containing protein 3	EHD3_MOUSE	28	59.8	60.82	74.33	97
102	7.4	43	Lasp1	LIM and SH3 domain protein 1	LASP1_MOUSE	10	35.7	29.994	82.6983	47
103	8.3	34	Rogdi	Protein rogdi homolog	ROGDI_MOUSE	16	59.2	32.1	66.7417	47
104	6.8	65	Dpysl2	Dihydropyrimidinase-related protein 2	DPYL2_MOUSE	19	46.5	62.277	86.7789	90
105	9.3	74	Syn1	Synapsin-1	SYN1_MOUSE	19	52.8	70.034	40.1897	68
105	9.3	74	Khdrbs1	KH domain-containing, RNA-binding, signal transduction-associated protein 1	KHDR1_MOUSE	4	7.4	48.37	26.2592	9
105	9.3	74	Rbm14	RNA-binding protein 14	RBM14_MOUSE	16	24.5	69.448	20.4462	41
106	9.8	36	Atp5c1	ATP synthase subunit gamma, mitochondrial	ATPG_MOUSE	8	23.5	32.886	92.778	20
107	4.8	80	Bin1	Myc box-dependent-interacting protein 1	BIN1_MOUSE	17	29.9	64.469	78.091	44
108	8.9	24	D10Jhu81e	ES1 protein homolog, mitochondrial	ES1_MOUSE	7	34.2	28.09	94.9142	33
109	6.7	54	Atp5a1	ATP synthase subunit alpha, mitochondrial	ATPA_MOUSE	16	29.8	59.752	76.8217	47
110	8.3	41	Gapdh	Glyceraldehyde-3-phosphate dehydrogenase	G3P_MOUSE	12	43.5	35.81	97.105	55
111	7.3	68	Nsf	Vesicle-fusing ATPase	NSF_MOUSE	27	37.2	82.613	80.8273	94
112	4.7	50	Hsp90ab1	Heat shock protein HSP 90-beta	HS90B_MOUSE	14	19.1	83.28	37.6794	40
112	4.7	50	Actg1	Actin, cytoplasmic 2	ACTG_MOUSE	5	24.5	41.792	33.2306	39
112	4.7	50	Ndrg2	Protein NDRG2	NDRG2_MOUSE	12	44.8	39.28	26.6035	34
113	4.8	78	Ubqln2	Ubiquilin-2	UBQL2_MOUSE	12	31.7	67.35	84.9418	52
114	9.4	52	Sept7	Septin-7	SEPT7_MOUSE	14	27.3	50.549	68.2158	15
115	5.2	46	Actg1	Actin, cytoplasmic 2	ACTG_MOUSE	8	27.5	41.792	71.569	44
116	9.8	34	Vdac3	Voltage-dependent anion-selective channel protein 3	VDAC3_MOUSE	8	39.2	30.752	62.1591	14
117	8.5	40	Hnrnpa2b1	Heterogeneous nuclear ribonucleoproteins A2/B1	ROA2_MOUSE	14	53.4	35.979	78.948	43
118	9.2	52	Sept7	Septin-7	SEPT7_MOUSE	6	13.3	50.549	71.2572	13
119	6.3	58	Sept6	Septin-6	SEPT6_MOUSE	11	37.9	48.763	36.9258	45
119	6.3	58	Aldh7a1	Alpha-aminoadipic semialdehyde dehydrogenase	AL7A1_MOUSE	16	35.4	55.644	33.4343	41
120	6.3	61	Dpysl3	Dihydropyrimidinase-related protein 3	DPYL3_MOUSE	17	49.5	61.936	64.3758	66
121	9.7	38	Dhrs1	Dehydrogenase/reductase SDR family member 1	DHRS1_MOUSE	9	32.9	34.005	82.8663	26
122	5.3	32	Cct5	T-complex protein 1 subunit epsilon	TCPE_MOUSE	8	13.9	59.623	27.1053	17
122	5.3	32	Actg1	Actin, cytoplasmic 2	ACTG_MOUSE	5	16.8	41.792	17.2354	10
123	9	52	Sept7	Septin-7	SEPT7_MOUSE	15	33.9	50.549	71.2523	25
124	7.6	100	Pitrm1	Presequence protease, mitochondrial	PREP_MOUSE	20	23.6	117.21	63.2176	41
125	4.7	52	Hsp90aa1	Heat shock protein HSP 90-alpha	HS90A_MOUSE	5	8.9	84.787	39.8095	19
125	4.7	52	Ndrg2	Protein NDRG2	NDRG2_MOUSE	9	38	40.789	32.1557	30
126	5.8	48	Gnb5	Guanine nucleotide-binding protein subunit beta-5	GBB5_MOUSE	10	32.9	38.731	78.801	26
127	7.1	71	Dnm1l	Dynamin-1-like protein	DNM1L_MOUSE	29	45.8	82.657	72.5747	80
128	7.6	68	Farsb	Phenylalanine--tRNA ligase beta subunit	SYFB_MOUSE	22	40.1	65.696	66.9205	54
129	7.3	48	Tufm	Elongation factor Tu, mitochondrial	EFTU_MOUSE	24	64.8	49.508	98.341	107
130	7.6	56	Aldh6a1	Methylmalonate-semialdehyde dehydrogenase [acylating], mitochondrial	MMSA_MOUSE	19	44.9	57.915	48.2452	47
130	7.6	56	Samm50	Sorting and assembly machinery component 50 homolog	SAM50_MOUSE	14	40.3	51.863	44.0353	47
131	6.5	37	Mdh1	Malate dehydrogenase, cytoplasmic	MDHC_MOUSE	10	32	36.511	69.0752	24
132	9.8	29	Mdh1	Malate dehydrogenase, cytoplasmic	MDHC_MOUSE	7	24.9	36.511	81.0206	17
133	10	40	Sfxn3	Sideroflexin-3	SFXN3_MOUSE	8	34	31.656	93.6289	30
134	4.8	76	Ubqln2	Ubiquilin-2	UBQL2_MOUSE	11	25.5	67.35	85.6263	59
135	7.8	45	Acot7	Cytosolic acyl coenzyme A thioester hydrolase	BACH_MOUSE	12	49.4	37.555	89.0465	57
136	7.1	34	Nmral1	NmrA-like family domain-containing protein 1	NMRL1_MOUSE	10	35.6	34.376	81.5313	26
137	6	78	Immt	MICOS complex subunit Mic60	MIC60_MOUSE	2	5.2	83.899	91.8702	101
138	5.1	51	Atp5b	ATP synthase subunit beta, mitochondrial	ATPB_MOUSE	10	32.9	56.3	43.7239	32
138	5.1	51	Nsfl1c	NSFL1 cofactor p47	NSF1C_MOUSE	13	48.1	40.709	21.0315	34
138	5.1	51	Ckb	Creatine kinase B-type	KCRB_MOUSE	7	23.1	42.713	19.6615	20
139	6.1	55	Tuba4a	Tubulin alpha-4A chain	TBA4A_MOUSE	4	12.1	49.924	37.765	36
139	6.1	55	Ppp2r2a	Serine/threonine-protein phosphatase 2A 55 kDa regulatory subunit B alpha isoform	2ABA_MOUSE	14	33.6	51.691	21.677	40
140	6.1	58	Phgdh	D-3-phosphoglycerate dehydrogenase	SERA_MOUSE	13	30.6	56.585	78.9286	35
141	9.8	29	Uqcrc2	Cytochrome b-c1 complex subunit 2, mitochondrial	QCR2_MOUSE	8	21.9	48.234	58.3394	33
142	5.4	18	Fth1	Ferritin heavy chain	FRIH_MOUSE	7	46.7	21.066	84.3487	30
143	7.9	34	Atp5a1	ATP synthase subunit alpha, mitochondrial	ATPA_MOUSE	14	30.6	59.752	91.7302	35
144	7.7	56	Glud1	Glutamate dehydrogenase 1, mitochondrial	DHE3_MOUSE	25	55	61.336	92.1929	80
145	8.2	66	Crat	Carnitine O-acetyltransferase	CACP_MOUSE	13	22.7	70.839	73.4889	29
146	5.9	90	Lonp1	Lon protease homolog, mitochondrial	LONM_MOUSE	23	31.5	105.84	98.7822	68
147	9.4	46	Got2	Aspartate aminotransferase, mitochondrial	AATM_MOUSE	17	35.6	47.411	97.7469	47
148	5.8	47	Mdh1	Malate dehydrogenase, cytoplasmic	MDHC_MOUSE	10	32.9	36.511	89.1097	22
149	9.2	27	Bphl	Valacyclovir hydrolase	BPHL_MOUSE	11	48.1	32.851	90.5038	31
150	5.6	90	Hspa4l	Heat shock 70 kDa protein 4L	HS74L_MOUSE	29	45.7	94.381	96.9017	99
151	9.5	64	Ddx5	Probable ATP-dependent RNA helicase DDX5	DDX5_MOUSE	26	43	69.289	89.8592	73
153	5.2	54	Atp5b	ATP synthase subunit beta, mitochondrial	ATPB_MOUSE	17	47.1	56.3	67.2426	54
154	8.2	70	Syn2	Synapsin-2	SYN2_MOUSE;	19	47.6	63.372	91.4091	65
155	7	25	cmt1	Protein-L-isoaspartate(D-aspartate) O-methyltransferase	PIMT_MOUSE	10	55.1	24.634	72.0382	49
157	4.6	14	Ppp3r1	Calcineurin subunit B type 1	CANB1_MOUSE	7	58.8	18.208	86.9975	18
158	5.3	49	Napb	Beta-soluble NSF attachment protein	SNAB_MOUSE;	17	66.8	33.557	62.3895	50
159	5.3	47	Napa	Alpha-soluble NSF attachment protein	SNAA_MOUSE;	19	75.6	33.189	64.4982	80
160	10.8	34	Ap2m1	AP-2 complex subunit mu	AP2M1_MOUSE	4	11.7	49.654	34.6201	11
160	10.8	34	Cenpv	Centromere protein V	CENPV_MOUSE	3	19.4	27.541	14.7738	5
161	6.8	77	Khsrp	Far upstream element-binding protein 2	FUBP2_MOUSE	26	50.8	76.775	83.9805	73
162	7.3	72	Pfkp	ATP-dependent 6-phosphofructokinase, platelet type	PFKAP_MOUSE	28	43.8	85.454	92.2882	94
163	9.3	60	Srp54	Signal recognition particle 54 kDa protein	SRP54_MOUSE	12	26.2	55.72	64.7155	30
163	9.3	60	Map6	Microtubule-associated protein 6	MAP6_MOUSE	9	29.2	61.104	22.0212	22
164	5.7	39	Pkm	Pyruvate kinase PKM	KPYM_MOUSE	15	30.1	57.984	58.4929	33
164	5.7	39	Ldhb	L-lactate dehydrogenase B chain	LDHB_MOUSE	10	34.7	36.572	29.6624	34
165	5.8	62	Cct5	T-complex protein 1 subunit epsilon	TCPE_MOUSE	27	47.9	59.623	87.039	100
166	7.1	49	Idh1	Isocitrate dehydrogenase [NADP] cytoplasmic	IDHC_MOUSE	21	50.5	46.674	83.7947	86
167	9.1	15	Map1lc3b	Microtubule-associated proteins 1A/1B light chain 3B	MLP3B_MOUSE	1	11.2	14.617	90.0759	5
168	5.8	44	Pdxk	Pyridoxal kinase	PDXK_MOUSE	10	32.1	35.015	91.0664	39
169	5.8	11	Fabp3	Fatty acid-binding protein, heart	FABPH_MOUSE	7	54.1	14.819	97.2526	16
170	9.4	36	Scrn1	Secernin-1	SCRN1_MOUSE	20	48.6	46.325	79.7002	62
171	4.7	58	Tpt1	Translationally-controlled tumor protein	TCTP_MOUSE	3	23.3	19.462	87.0672	24
172	4.8	27	Tpt1	Translationally-controlled tumor protein	TCTP_MOUSE	4	27.3	19.462	88.0062	31
173	4.5	17	Sncb	Beta-synuclein	SYUB_MOUSE	5	39.1	14.051	97.6896	17
174	6	59	Sept8	Septin-8	SEPT8_MOUSE	10	25.9	49.812	31.3424	37
174	6	59	Nsf	Vesicle-fusing ATPase	NSF_MOUSE	14	22.3	82.613	12.4134	33
175	7.6	28	Etfb	Electron transfer flavoprotein subunit beta	ETFB_MOUSE	10	44.7	27.623	79.4744	30
176	7.3	44	Adh5	Alcohol dehydrogenase class-3	ADHX_MOUSE	11	24.3	39.547	62.9312	28
176	7.3	44	Fibp	Acidic fibroblast growth factor intracellular-binding protein	FIBP_MOUSE	12	44	41.204	13.9748	33
177	8.2	77	Pfkm	ATP-dependent 6-phosphofructokinase, muscle type	PFKAM_MOUSE	26	42.9	85.268	98.208	85
178	9.6	47	Idh3g	Isocitrate dehydrogenase [NAD] subunit gamma 1, mitochondrial	IDHG1_MOUSE	10	41.2	42.785	80.0286	44
179	4.8	51	Ppp1r7	Protein phosphatase 1 regulatory subunit 7	PP1R7_MOUSE	22	59.3	41.291	88.1771	70
180	7.1	69	Wdr1	WD repeat-containing protein 1	WDR1_MOUSE	21	48.5	66.406	85.8662	75
181	8.4	29	Prosc	Proline synthase co-transcribed bacterial homolog protein	PROSC_MOUSE	9	33.9	30.048	88.3632	34
182	6.4	50	Map2k1	Dual specificity mitogen-activated protein kinase kinase 1	MP2K1_MOUSE	11	29.5	43.474	58.4782	26
183	5.3	74	Ndufs1	NADH-ubiquinone oxidoreductase 75 kDa subunit, mitochondrial	NDUS1_MOUSE	26	35.2	79.776	76.4656	77
184	6.9	64	Stip1	Stress-induced-phosphoprotein 1	STIP1_MOUSE	28	47.9	62.581	79.1991	81
185	8.1	77	Aco2	Aconitate hydratase, mitochondrial	ACON_MOUSE	17	31.2	85.462	95.6612	55
186	6.5	47	Sept5	Septin-5	SEPT5_MOUSE	11	42.5	42.747	50.3263	36
186	6.5	47	Pkm	Pyruvate kinase PKM	KPYM_MOUSE	17	37.1	57.984	32.7843	42
187	7.3	21	Atp5a1	ATP synthase subunit alpha, mitochondrial	ATPA_MOUSE	1	3.8	59.752	82.1689	4
188	7.3	76	Ppp1r21	Protein phosphatase 1 regulatory subunit 21	PPR21_MOUSE	20	31.8	88.337	75.5208	47
189	7.4	74	Tf	Serotransferrin	TRFE_MOUSE	19	28.8	76.723	81.3597	41
190	7.1	69	Stxbp1	Syntaxin-binding protein 1	STXB1_MOUSE	1	2.5	68.735	88.9794	60
191	10.2	40	Eef1a2	Elongation factor 1-alpha 2	EF1A2_MOUSE	7	14.9	50.454	83.8345	11
192	9.4	34	Vdac3	Voltage-dependent anion-selective channel protein 3	VDAC3_MOUSE	7	33.6	30.752	75.4072	23
193	7.5	58	Syn2	Synapsin-2	SYN2_MOUSE	15	37.6	52.451	41.8007	45
193	7.5	58	Cct4	T-complex protein 1 subunit delta	TCPD_MOUSE	14	29.3	58.066	35.3066	37
194	5.5	49	Ahsa1	Activator of 90 kDa heat shock protein ATPase homolog 1	AHSA1_MOUSE	6	21.3	38.117	50.4047	9
195	4.7	29	Psma5	Proteasome subunit alpha type-5	PSA5_MOUSE	7	34.4	26.411	71.2044	21
196	7.5	83	Aco1	Cytoplasmic aconitate hydratase	ACOC_MOUSE	26	31.7	98.124	88.2504	66
197	5.3	24	Apoa1	Apolipoprotein A-I	APOA1_MOUSE	13	40.9	30.615	92.0052	51
198	7.8	80	Aco2	Aconitate hydratase, mitochondrial	ACON_MOUSE	29	42.8	85.462	90.6701	81
199	10.1	38	Hnrnpa1	Heterogeneous nuclear ribonucleoprotein A1	ROA1_MOUSE	8	26.2	34.196	75.8273	27
200	7.1	21	Gsta4	Glutathione S-transferase A4	GSTA4_MOUSE	8	36	25.564	59.6633	22
200	7.1	21	Rnf181	E3 ubiquitin-protein ligase RNF181	RN181_MOUSE	1	6.8	13.598	27.6839	0
201	6.6	100	Pc	Pyruvate carboxylase, mitochondrial	PYC_MOUSE	28	29.6	129.68	91.4617	61
202	7.1	80	Pygb	Glycogen phosphorylase, brain form	PYGB_MOUSE	12	18.7	96.729	70.4274	23
202	7.1	80	Dnm1	Dynamin-1	DYN1_MOUSE	4	7.2	96.056	11.6943	9
203	8	80	Aco2	Aconitate hydratase, mitochondrial	ACON_MOUSE	29	43.6	85.462	99.4242	76
204	4.7	51	Rpsa	40S ribosomal protein SA	RSSA_MOUSE	12	48.8	32.838	87.7013	50
205	5.3	46	Sh3gl2	Endophilin-A1	SH3G2_MOUSE	13	38.6	39.955	59.611	41
205	5.3	46	Idh3a	Isocitrate dehydrogenase [NAD] subunit alpha, mitochondrial	IDH3A_MOUSE	8	22.7	39.638	14.561	22
206	6.8	37	Mdh1	Malate dehydrogenase, cytoplasmic	MDHC_MOUSE	10	33.2	36.511	69.7873	29
207	7.7	71	Syn2	Synapsin-2	SYN2_MOUSE	16	43.3	63.372	94.3678	58
208	9.2	21	Psmb5	Proteasome subunit beta type-5	PSB5_MOUSE	12	48.1	28.532	90.2531	50
209	6.7	43	Dnm1	Dynamin-1	DYN1_MOUSE	13	12.9	96.056	64.9254	40
209	6.7	43	Dnm2	Dynamin-2	DYN2_MOUSE	1	1.2	97.732	13.8201	2
210	7.4	40	Anxa2	Annexin A2	ANXA2_MOUSE	15	43.4	38.676	64.5522	36
210	7.4	40	Carkd	ATP-dependent (S)-NAD(P)H-hydrate dehydratase	NNRD_MOUSE	5	19.5	32.151	18.0115	16
211	5.3	15	Stk36	Serine/threonine-protein kinase 36	STK36_MOUSE	1	0.7	129.98	53.4006	1
211	5.3	15	Gmfb	Glia maturation factor beta	GMFB_MOUSE	2	14.1	16.723	28.4471	7
212	5.1	62	Vcp	Transitional endoplasmic reticulum ATPase	TERA_MOUSE	18	31.9	89.321	66.0116	69
212	5.1	62	Pacsin2	Protein kinase C and casein kinase substrate in neurons protein 2	PACN2_MOUSE	11	27.4	55.832	14.5491	27
213	4.9	30	Calb2	Calretinin	CALB2_MOUSE	12	41	31.372	87.7884	44
214	5.4	58	Atp6v1b2	V-type proton ATPase subunit B, brain isoform	VATB2_MOUSE	15	37.4	56.55	71.6571	36
215	9.3	64	Ddx5	Probable ATP-dependent RNA helicase DDX5	DDX5_MOUSE	11	17.8	69.289	92.1039	21
216	5.6	42	Rnf181	E3 ubiquitin-protein ligase RNF181	RN181_MOUSE	1	6.8	13.598	30.5528	1
216	5.6	42	Eno1	Alpha-enolase	ENOA_MOUSE	6	16.4	47.14	17.2466	17
216	5.6	42	Ldhb	L-lactate dehydrogenase B chain	LDHB_MOUSE	9	27.5	36.572	15.5544	28
217	5.7	43	Ddah1	N(G),N(G)-dimethylarginine dimethylaminohydrolase 1	DDAH1_MOUSE	14	55.4	31.381	92.2691	66
218	7	40	Alad	Delta-aminolevulinic acid dehydratase	HEM2_MOUSE	14	47.9	36.023	83.33	49
220	6	52	Eno1	Alpha-enolase	ENOA_MOUSE	14	45.6	47.14	83.2928	52
222	5.5	95	Hspa4l	Heat shock 70 kDa protein 4L	HS74L_MOUSE	20	32	94.381	78.8351	47
223	4.8	95	Usp5	Ubiquitin carboxyl-terminal hydrolase 5	UBP5_MOUSE	16	23	95.832	73.3818	43
223	4.8	95	Tuba1c	Tubulin alpha-1C chain	TBA1C_MOUSE	6	17.4	49.909	13.935	12
224	4.8	95	Usp5	Ubiquitin carboxyl-terminal hydrolase 5	UBP5_MOUSE	18	26.2	95.832	71.4563	51
225	8.7	67	Myef2	Myelin expression factor 2	MYEF2_MOUSE	11	20.4	61.733	73.2922	36
226	7.2	33	Gsto1	Glutathione S-transferase omega-1	GSTO1_MOUSE	13	42.1	27.497	84.798	41
227	5.9	67	Hnrnph2	Heterogeneous nuclear ribonucleoprotein H2	HNRH2_MOUSE	7	25.6	49.279	79.4487	55
229	7.2	25	Tpi1	Triosephosphate isomerase	TPIS_MOUSE	14	50.8	32.191	98.5593	50
230	10.5	34	Phb2	Prohibitin-2	PHB2_MOUSE	8	29.1	33.296	97.8204	18
231	4.6	42	Armcx1	Armadillo repeat-containing X-linked protein 1	ARMX1_MOUSE	1	1.5	50.643	62.773	0
231	4.6	42	Tpm1	Tropomyosin alpha-1 chain	TPM1_MOUSE	4	9.9	32.708	24.9551	20
232	8.1	37	Vdac1	Voltage-dependent anion-selective channel protein 1	VDAC1_MOUSE	19	73.1	30.755	99.4612	70
233	6.9	90	Ogdh	2-oxoglutarate dehydrogenase, mitochondrial	ODO1_MOUSE	30	38.7	116.45	49.3222	79
234	8.4	73	Hnrnph2	Heterogeneous nuclear ribonucleoprotein H2	HNRPL_MOUSE	11	31.2	63.963	60.3882	33
234	8.4	73	Vdac1	Voltage-dependent anion-selective channel protein 1	VDAC1_MOUSE	4	21.9	30.755	16.5436	11
235	7.2	90	Ogdh	2-oxoglutarate dehydrogenase, mitochondrial	ODO1_MOUSE	33	39.8	117.76	93.3889	77
236	7.5	76	Ddx3x	ATP-dependent RNA helicase DDX3X	DDX3X_MOUSE	3	9.5	73.101	79.3029	60
237	5.6	22	Atp5h	ATP synthase subunit d, mitochondrial	ATP5H_MOUSE	14	70.2	18.749	98.7632	61
238	10.5	27	Pkm	Pyruvate kinase PKM	KPYM_MOUSE	1	4.1	57.844	25.1244	11
238	10.5	27	Pgk1	Phosphoglycerate kinase 1	PGK1_MOUSE	4	12.2	44.55	17.2871	7
238	10.5	27	Cct7	T-complex protein 1 subunit eta	TCPH_MOUSE	3	7.2	59.652	16.6122	8
239	4.9	47	Hspa8	Heat shock cognate 71 kDa protein	HSP7C_MOUSE	9	17.2	70.87	48.7819	27
239	4.9	47	Hnrnpc	Heterogeneous nuclear ribonucleoproteins C1/C2	HNRPC_MOUSE	11	38	33.056	24.9548	35
240	5.6	90	Hspa4l	Heat shock 70 kDa protein 4L	HS74L_MOUSE	22	33.7	94.381	88.5702	68
241	7	82	Dnm1	Dynamin-1	DYN1_MOUSE	1	1.8	96.056	59.0415	136
241	7	82	Pygb	Glycogen phosphorylase, brain form	PYGB_MOUSE	25	36.1	96.729	32.8258	72
242	8.6	15	Ppia	Peptidyl-prolyl cis-trans isomerase A	PPIA_MOUSE	9	59.8	17.971	97.0018	40
243	6.9	82	Ogt	UDP-N-acetylglucosamine--peptide N-acetylglucosaminyltransferase 110 kDa subunit	OGT1_MOUSE	3	2.8	116.95	65.3674	80
244	7.1	82	Eef2	Elongation factor 2	EF2_MOUSE	26	33.7	95.313	74.6012	70
245	5.1	29	Arhgdia	Rho GDP-dissociation inhibitor 1	GDIR1_MOUSE	8	51.5	23.407	90.2993	33
246	5.3	28	Uchl1	Ubiquitin carboxyl-terminal hydrolase isozyme L1	UCHL1_MOUSE	10	66.4	24.838	47.4091	36
246	5.3	28	Mtx2	Metaxin-2	MTX2_MOUSE	7	30.8	29.758	32.8388	22
255			Syn1	Synapsin-1	SYN1_MOUSE	10	21.3	70.034	56.6333	19
255			Sec61g	Protein transport protein Sec61 subunit gamma	SC61G_MOUSE	1	23.5	7.7412	14.3925	0
256			Eif2s3x	Eukaryotic translation initiation factor 2 subunit 3, X-linked	IF2G_MOUSE	15	36.9	51.065	68.2345	46
256			Baiap2	Brain-specific angiogenesis inhibitor 1-associated protein 2	BAIP2_MOUSE	11	28	53.274	8.62888	24
257			Tuba1c	Tubulin alpha-1C chain	TBA1C_MOUSE	3	9.4	49.909	40.5054	4
257			Nefl	Neurofilament light polypeptide	NFL_MOUSE	10	16.2	61.508	27.8739	18
259			Prps1	Ribose-phosphate pyrophosphokinase 1	PRPS1_MOUSE	13	45.9	34.834	49.4585	51
259			Rnf181	E3 ubiquitin-protein ligase RNF181	RN181_MOUSE	1	6.8	13.598	31.1745	13
260			Immt	MICOS complex subunit Mic60	MIC60_MOUSE	26	40.2	82.928	55.3688	87
260			Rnf181	E3 ubiquitin-protein ligase RNF181	RN181_MOUSE	1	6.8	13.598	27.8236	9
261			Lrpprc	Leucine-rich PPR motif-containing protein, mitochondrial	LPPRC_MOUSE	17	12.7	156.61	93.024	29
262			Hsp90ab1	Heat shock protein HSP 90-beta	HS90B_MOUSE	22	32.2	83.28	45.922	68
262			Rnf181	E3 ubiquitin-protein ligase RNF181	RN181_MOUSE	1	6.8	13.598	44.275	10
263			Arpc2	Actin-related protein 2/3 complex subunit 2	ARPC2_MOUSE	14	53.3	34.357	92.728	112
265			Atp5b	ATP synthase subunit beta, mitochondrial	ATPB_MOUSE	19	52.9	56.3	70.4925	101
265			Basp1	Brain acid soluble protein 1	BASP1_MOUSE	11	73.9	22.086	15.9546	64
266			Tardbp	TAR DNA-binding protein 43	TADBP_MOUSE	9	28.5	44.547	60.3595	25
266			Sept5	Septin-5	SEPT5_MOUSE	10	27.1	42.747	10.5049	21
267			Uqcrc2	Cytochrome b-c1 complex subunit 2, mitochondrial	QCR2_MOUSE	2	6.6	48.234	80.3059	10
268			Tagln	Transgelin	TAGL_MOUSE	16	76.6	22.576	55.0745	63
268			Got1	Aspartate aminotransferase, cytoplasmic	AATC_MOUSE	9	24.5	46.247	30.8419	22
269			Rnf181	E3 ubiquitin-protein ligase RNF181	RN181_MOUSE	1	6.8	13.598	97.434	13
270			Ndufa4	Cytochrome c oxidase subunit NDUFA4	NDUA4_MOUSE	5	47.6	9.3267	38.5307	32
270			Stk36	Serine/threonine-protein kinase 36	STK36_MOUSE	1	0.7	129.98	35.3012	1
271			Vcl	Vinculin	VINC_MOUSE	42	49.9	116.72	92.7754	148
272			Cltb	Clathrin light chain B	CLCB_MOUSE	12	38.4	25.171	96.0616	101
273			Hnrnpf	Heterogeneous nuclear ribonucleoprotein F	HNRPF_MOUSE	11	34	45.729	61.5941	62
273			Actg1	Actin, cytoplasmic 2	ACTG_MOUSE	10	33.3	41.792	14.2516	27
274			Rnf181	E3 ubiquitin-protein ligase RNF181	RN181_MOUSE	1	6.8	13.598	55.1454	10
274			Eno2	Gamma-enolase	ENOG_MOUSE	8	20	47.296	14.919	24
275			Lrmp	Lymphoid-restricted membrane protein	LRMP_MOUSE	1	1.5	59.587	48.7358	2
275			Rnf181	E3 ubiquitin-protein ligase RNF181	RN181_MOUSE	1	6.8	13.598	39.4658	12
276			Hadha	Trifunctional enzyme subunit alpha, mitochondrial	ECHA_MOUSE	25	41.8	82.669	54.513	98
277			Stk36	Serine/threonine-protein kinase 36	STK36_MOUSE	1	0.7	129.98	37.7242	3
277			Acadvl	Very long-chain specific acyl-CoA dehydrogenase, mitochondrial	ACADV_MOUSE	23	46.8	70.875	25.6344	56
278			Gdi1	Rab GDP dissociation inhibitor alpha	GDIA_MOUSE	17	48.1	50.521	36.5379	41
278			Tom1l2	TOM1-like protein 2	TM1L2_MOUSE	10	32.2	53.382	22.724	27
278			Tuba1c	Tubulin alpha-1C chain	TBA1C_MOUSE	9	26.9	49.909	17.4043	21
278			Rad23b	UV excision repair protein RAD23 homolog B	RD23B_MOUSE	10	31.7	43.512	16.8521	21
279			Mdh2	Malate dehydrogenase, mitochondrial	MDHM_MOUSE	6	20.7	35.611	39.1689	13
279			Aldoa	Fructose-bisphosphate aldolase A	ALDOA_MOUSE	5	16.5	39.355	37.0543	9
280			Akr1a1	Alcohol dehydrogenase [NADP(+)]	AK1A1_MOUSE	14	50.2	36.586	92.9293	62
281			Rnf181	E3 ubiquitin-protein ligase RNF181	RN181_MOUSE	1	6.8	13.598	44.7201	11
281			Ppme1	Protein phosphatase methylesterase 1	PPME1_MOUSE	13	34.5	42.256	40.2854	43
282			Hsph1	Heat shock protein 105 kDa	HS105_MOUSE	29	42.8	96.406	67.9195	104
282			Add2	Beta-adducin	ADDB_MOUSE	15	23.6	80.641	16.4492	44
283			Rabep1	Rab GTPase-binding effector protein 1	RABE1_MOUSE	22	28.1	95.025	50.72	39
283			Rnf181	E3 ubiquitin-protein ligase RNF181	RN181_MOUSE	1	6.8	13.598	23.8662	0
284			Pygm	Glycogen phosphorylase, muscle form	PYGM_MOUSE	27	32.7	97.285	74.7515	72
285			Sf3a1	Splicing factor 3A subunit 1	SF3A1_MOUSE	19	29.1	88.544	81.4858	55
286			Lrmp	Lymphoid-restricted membrane protein	LRMP_MOUSE	1	1.5	59.587	32.0251	7
286			Elavl3	ELAV-like protein 3	ELAV3_MOUSE	1	2.2	39.533	32.0251	1
286			Stk36	Serine/threonine-protein kinase 36	STK36_MOUSE	1	0.7	129.98	32.0251	5
287			Arpc5l	Actin-related protein 2/3 complex subunit 5-like protein	ARP5L_MOUSE	9	63.4	16.98	96.4506	29
288			Lrmp	Lymphoid-restricted membrane protein	LRMP_MOUSE	1	1.5	59.587	27.8423	1
288			Stk36	Serine/threonine-protein kinase 36	STK36_MOUSE	1	0.7	129.98	27.8423	1
288			Rnf181	E3 ubiquitin-protein ligase RNF181	RN181_MOUSE	1	6.8	13.598	20.8844	13
289			Sfpq	Splicing factor, proline- and glutamine-rich	SFPQ_MOUSE	15	23	75.441	89.8319	78
290			Frem2	FRAS1-related extracellular matrix protein 2	FREM2_MOUSE	1	0.8	350.64	35.3589	1
290			Opa1	Dynamin-like 120 kDa protein, mitochondrial	OPA1_MOUSE	18	21	111.34	15.213	34
291			Gm7120	Transmembrane protein C5orf28 homolog	CE028_MOUSE	1	7.9	24.151	50.2031	0
291			Wdr64	WD repeat-containing protein 64	WDR64_MOUSE	1	0.9	109.63	25.3289	1
291			Eps15l1	Epidermal growth factor receptor substrate 15-like 1	EP15R_MOUSE	4	7.6	75.877	24.468	7
292			Pgp	Phosphoglycolate phosphatase	PGP_MOUSE	6	23.1	34.54	40.3437	19
292			Eno2	Gamma-enolase	ENOG_MOUSE	5	15	47.296	10.7917	9
293			Acaa2	3-ketoacyl-CoA thiolase, mitochondrial	THIM_MOUSE	14	53.9	41.829	81.1895	59
294			Acly	ATP-citrate synthase	ACLY_MOUSE	38	40.2	119.73	50.3991	146
295			Eef1a1	Elongation factor 1-alpha 1	EF1A1_MOUSE	9	23.8	50.113	62.5964	30
295			Rnf181	E3 ubiquitin-protein ligase RNF181	RN181_MOUSE	1	6.8	13.598	14.8675	0
296			Lrmp	Lymphoid-restricted membrane protein	LRMP_MOUSE	1	1.5	59.587	27.832	2
296			Elavl3	ELAV-like protein 3	ELAV3_MOUSE	1	2.2	39.533	27.832	1
296			Stk36	Serine/threonine-protein kinase 36	STK36_MOUSE	1	0.7	129.98	27.832	1
298			Glul	Glutamine synthetase	GLNA_MOUSE	8	22.8	42.119	57.5654	20
298			Rnf181	E3 ubiquitin-protein ligase RNF181	RN181_MOUSE	1	6.8	13.598	21.3642	0
299			Ppp1r7	Protein phosphatase 1 regulatory subunit 7	PP1R7_MOUSE	1	3.3	41.291	23.7602	1
299			Hsp90ab1	Heat shock protein HSP 90-beta	HS90B_MOUSE	7	11.6	83.28	17.648	17
299			Tuba1c	Tubulin alpha-1C chain	TBA1C_MOUSE	4	8.5	49.909	17.5492	5
301			Lrmp	Lymphoid-restricted membrane protein	LRMP_MOUSE	1	1.5	59.587	39.8746	3
301			Stk36	Serine/threonine-protein kinase 36	STK36_MOUSE	1	0.7	129.98	39.8746	3
302			Gnb1	Guanine nucleotide-binding protein G(I)/G(S)/G(T) subunit beta-1	GBB1_MOUSE	9	27.1	37.377	72.2529	49
303			Hspa4	Heat shock 70 kDa protein 4	HSP74_MOUSE	22	33.8	94.132	70.041	44
304			Rnf181	E3 ubiquitin-protein ligase RNF181	RN181_MOUSE	1	6.8	13.598	53.2069	19
304			Lrmp	Lymphoid-restricted membrane protein	LRMP_MOUSE	1	1.5	59.587	33.1164	2
305			Rnf181	E3 ubiquitin-protein ligase RNF181	RN181_MOUSE	1	6.8	13.598	76.6449	1
305			Dpysl3	Dihydropyrimidinase-related protein 3	DPYL3_MOUSE	14	34	61.936	13.0357	28
306			Rnf181	E3 ubiquitin-protein ligase RNF181	RN181_MOUSE	1	6.8	13.598	26.7155	20
306			Lrmp	Lymphoid-restricted membrane protein	LRMP_MOUSE	1	1.5	59.587	16.2802	3
306			Stk36	Serine/threonine-protein kinase 36	STK36_MOUSE	1	0.7	129.98	16.2802	2
306			Obfc1	CST complex subunit STN1	STN1_MOUSE	1	2.1	43.485	16.2802	1
307			Rnf181	E3 ubiquitin-protein ligase RNF181	RN181_MOUSE	1	6.8	13.598	34.4007	5
307			Aldoc	Fructose-bisphosphate aldolase C	ALDOC_MOUSE	15	52.9	39.394	28.8906	47
307			Ythdc2	Probable ATP-dependent RNA helicase YTHDC2	YTDC2_MOUSE	1	1.3	161.09	14.6797	1
308			Rnf181	E3 ubiquitin-protein ligase RNF181	RN181_MOUSE	1	6.8	13.598	80.8595	14
309			Rnf181	E3 ubiquitin-protein ligase RNF181	RN181_MOUSE	1	6.8	13.598	78.4287	18
309			Ldhb	L-lactate dehydrogenase B chain	LDHB_MOUSE	8	30.5	36.572	10.7508	20
310			Rnf181	E3 ubiquitin-protein ligase RNF181	RN181_MOUSE	1	6.8	13.598	92.8974	8
311			Stk36	Serine/threonine-protein kinase 36	STK36_MOUSE	1	0.7	129.98	56.0971	2
311			Cops5	COP9 signalosome complex subunit 5	CSN5_MOUSE	10	34.1	37.548	20.9879	35
312			Fascin	Fascin	FSCN1_MOUSE	8	16.8	54.507	48.2583	17
312			Aldh7a1	Alpha-aminoadipic semialdehyde dehydrogenase	AL7A1_MOUSE	9	21.3	55.644	23.2643	19
313			Lrmp	Lymphoid-restricted membrane protein	LRMP_MOUSE	1	1.5	59.587	30.975	4
313			Elavl3	ELAV-like protein 3	ELAV3_MOUSE	1	2.2	39.533	30.975	4
313			Stk36	Serine/threonine-protein kinase 36	STK36_MOUSE	1	0.7	129.98	30.975	2
314			Hint1	Histidine triad nucleotide-binding protein 1	HINT1_MOUSE	7	78.6	13.777	90.6851	41
315			Syn2	Synapsin-2	SYN2_MOUSE	8	20.9	52.451	33.279	21
316			Gsr	Glutathione reductase, mitochondrial	GSHR_MOUSE	10	26.6	51.073	48.1253	38
316			Gpi	Glucose-6-phosphate isomerase	G6PI_MOUSE	8	22	62.766	19.5676	19
317			Me1	NADP-dependent malic enzyme	MAOX_MOUSE	4	11.7	63.953	37.1698	10
317			Mdh1	Malate dehydrogenase, cytoplasmic	MDHC_MOUSE	6	24.6	36.511	22.9214	11
318			uba1c	Tubulin alpha-1C chain	TBA1C_MOUSE	15	44.8	49.909	49.4343	54
318			Tubb4b	Tubulin beta-4B chain	TBB4B_MOUSE	16	47.4	49.83	21.5453	57
319			Eef1a1	Elongation factor 1-alpha 1	EF1A1_MOUSE	10	25.8	50.113	70.9432	36
319			Eef1a2	Elongation factor 1-alpha 2	EF1A2_MOUSE	10	25.7	50.454	13.5481	7
320			Lrmp	Lymphoid-restricted membrane protein	LRMP_MOUSE	1	1.5	59.587	60.5156	2
320			Acly	ATP-citrate synthase	ACLY_MOUSE	35	36.8	119.73	37.7064	95
321			Them4	Acyl-coenzyme A thioesterase THEM4	THEM4_MOUSE	6	30	26.031	47.3707	15
321			Pkm	Pyruvate kinase PKM	KPYM_MOUSE	6	11.1	57.984	25.9128	22
322			Epn1	Epsin-1	EPN1_MOUSE	6	14.4	60.211	32.1706	14
323			Map6	Microtubule-associated protein 6	MAP6_MOUSE	30	43.6	96.449	78.3558	96
324			Gstp1	Glutathione S-transferase P 1	GSTP1_MOUSE	10	55.7	23.609	85.4031	27
324			Gstt2	Glutathione S-transferase theta-2	GSTT2_MOUSE	5	26.6	27.634	11.3852	9
325			Smg7	Protein SMG7	SMG7_MOUSE	1	0.6	126.56	91.0548	1
326			Map2	Microtubule-associated protein 2	MTAP2_MOUSE	24	16.2	199.13	88.6368	70
327			Ogdh	2-oxoglutarate dehydrogenase, mitochondrial	ODO1_MOUSE	7	8.9	115.42	27.8595	11
327			Pfkp	ATP-dependent 6-phosphofructokinase, platelet type	PFKAP_MOUSE	6	10.2	85.454	16.9155	11
328			Pip4k2c	Phosphatidylinositol 5-phosphate 4-kinase type-2 gamma	PI42C_MOUSE	12	33.7	47.335	20.2388	28
328			Gab2	GRB2-associated-binding protein 2	GAB2_MOUSE	1	2.6	73.207	16.5795	2
328			Cltc	Clathrin heavy chain 1	CLH1_MOUSE	13	10.5	191.55	12.7832	20
329			Ddx17	Probable ATP-dependent RNA helicase DDX17	DDX17_MOUSE	5	9.4	72.399	42.9239	7
329			Dsp	Desmoplakin	DESP_MOUSE	6	2	332.91	21.1201	7
330			Mdh2	Malate dehydrogenase, mitochondrial	MDHM_MOUSE	9	31.4	35.611	72.5694	48
330			Gstk1	Glutathione S-transferase kappa 1	GSTK1_MOUSE	8	44.7	25.704	10.3522	14
331			Crmp1	Dihydropyrimidinase-related protein 1	DPYL1_MOUSE	20	49.8	62.167	35.946	69
331			Me2	NAD-dependent malic enzyme, mitochondrial	MAOM_MOUSE	21	43.1	65.798	29.7194	75
332			Sept7	Septin-7	SEPT7_MOUSE	20	43.8	50.549	75.8752	72
332			Mrpl37	39S ribosomal protein L37, mitochondrial	RM37_MOUSE	13	40.9	48.34	13.0901	32
333			Ina	Alpha-internexin	AINX_MOUSE	24	46.9	55.382	58.8339	94
333			Actg1/Actb	Actin, cytoplasmic	ACTG_MOUSE|ACTB_MOUSE	10	29.9	41.792	15.6295	30
334			Vdac2	Voltage-dependent anion-selective channel protein 2	VDAC2_MOUSE	7	31.9	31.732	27.7647	16
334			Got1	Aspartate aminotransferase, cytoplasmic	AATC_MOUSE	11	27.4	46.247	25.4953	27
334			Ldhb	L-lactate dehydrogenase B chain	LDHB_MOUSE	8	27.5	36.572	15.088	15
335			Sptan1	Spectrin alpha chain, non-erythrocytic 1	SPTN1_MOUSE	34	16.9	282.34	76.9981	78
336			Coro2b	Coronin-2B	COR2B_MOUSE	11	26	54.936	75.5701	24
336			Syn1	Synapsin-1	SYN1_MOUSE	10	23	70.034	12.5892	17
337			Selenbp1	Selenium-binding protein 1	SBP1_MOUSE	20	56.8	52.513	32.5508	54
337			Hnrnph1	Heterogeneous nuclear ribonucleoprotein H	HNRH1_MOUSE	11	31	49.199	24.6537	36
337			Sept8	Septin-8	SEPT8_MOUSE	13	33.8	49.812	19.8181	31
338			Aldoa	Fructose-bisphosphate aldolase A	ALDOA_MOUSE	11	47.5	39.355	83.6617	59
339			Arl3	ADP-ribosylation factor-like protein 3	ARL3_MOUSE	8	59.9	20.486	83.7633	33
340			Mapk1	Mitogen-activated protein kinase 1	MK01_MOUSE	22	66.8	41.275	42.3305	130
340			Got1	Aspartate aminotransferase, cytoplasmic	AATC_MOUSE	21	63.4	46.247	31.8208	94
340			Aldoc	Fructose-bisphosphate aldolase C	ALDOC_MOUSE	19	65	39.394	13.1032	63
341			Ppa2	Inorganic pyrophosphatase 2, mitochondrial	IPYR2_MOUSE	15	55.5	38.114	71.1524	53
341			Eno1	Alpha-enolase	ENOA_MOUSE	7	22.6	47.14	13.3034	18
342			Aak1	AP2-associated protein kinase 1	AAK1_MOUSE	19	36.5	103.35	35.3036	45
342			Cntn1	Contactin-1	CNTN1_MOUSE	28	31.1	113.39	35.0564	61
343			Eef1a1	Elongation factor 1-alpha 1	EF1A1_MOUSE	8	18.6	50.113	87.7296	20
344			Hk1	Hexokinase-1	HXK1_MOUSE	35	41.2	102.3	85.7243	129
345			Ddx5	Probable ATP-dependent RNA helicase DDX5	DDX5_MOUSE	26	38.6	69.289	82.4428	75
346			Syn1	Synapsin-1	SYN1_MOUSE	8	20.4	70.034	33.5885	17
346			Xrra1	X-ray radiation resistance-associated protein 1	XRRA1_MOUSE	1	1.7	88.883	19.2928	13
346			Arhgef17	Rho guanine nucleotide exchange factor 17	ARHGH_MOUSE	1	0.5	221.67	14.6303	2
347			Acot7	Cytosolic acyl coenzyme A thioester hydrolase	BACH_MOUSE	17	56.5	37.555	70.3527	75
347			Aldoc	Fructose-bisphosphate aldolase C	ALDOC_MOUSE	14	47.7	39.394	11.5863	36
348			Rab11fip1	Rab11 family-interacting protein 1	RFIP1_MOUSE	1	1.2	70.683	39.5265	1
348			Lrmp	Lymphoid-restricted membrane protein	LRMP_MOUSE	1	1.5	59.587	35.8606	1
348			Syn1	Synapsin-1	SYN1_MOUSE	20	49.7	70.034	12.0533	53
349			Nefm	Neurofilament medium polypeptide	NFM_MOUSE	27	37.6	95.915	51.9314	65
349			Dbn1	Drebrin	DREB_MOUSE	13	24.5	77.286	24.0815	31
350			Sfpq	Splicing factor, proline- and glutamine-rich	SFPQ_MOUSE	19	30.3	75.441	78.3777	73
351			Eef1a1	Elongation factor 1-alpha 1	EF1A1_MOUSE	11	27.5	50.113	58.519	27
351			Syn1	Synapsin-1	SYN1_MOUSE	16	40	70.034	32.0383	35
352			Pdha1	Pyruvate dehydrogenase E1 component subunit alpha, somatic form, mitochondrial	ODPA_MOUSE	23	57.4	43.231	95.2546	230
353			Syn2	Synapsin-2	SYN2_MOUSE	20	57.8	52.451	59.7201	129
353			Pkm	Pyruvate kinase PKM	KPYM_MOUSE	22	45.6	57.984	14.8719	71
354			Tuba4a	Tubulin alpha-4A chain	TBA4A_MOUSE	7	20.5	49.924	34.4878	23
354			Rpsa	40S ribosomal protein SA	RSSA_MOUSE	6	31.9	32.838	33.9861	15
355			Nudt18	8-oxo-dGDP phosphatase NUDT18	NUD18_MOUSE	1	9.6	35.693	39.4183	0
355			Tmem185a	Transmembrane protein 185A	T185A_MOUSE	1	8.9	40.619	39.0523	0
356			Ubqln4	Ubiquilin-4	UBQL4_MOUSE	8	17.8	63.505	32.4918	9
356			Ranbp3	Ran-binding protein 3	RANB3_MOUSE	5	14.5	52.572	14.2433	8
357			Ddx1	ATP-dependent RNA helicase DDX1	DDX1_MOUSE	23	35.9	82.499	52.353	53
357			Pkm	Pyruvate kinase PKM	KPYM_MOUSE	19	38	57.984	19.2842	32
358			Tuba1b	Tubulin alpha-1B chain	TBA1B_MOUSE	11	31.9	50.151	67.0977	41
359			Syn1	Synapsin-1	SYN1_MOUSE	8	17.5	70.034	100	14
360			Coro2b	Coronin-2B	COR2B_MOUSE	9	22.1	54.936	68.1795	21
361			Stxbp1	Syntaxin-binding protein 1	STXB1_MOUSE	30	50.7	67.568	87.9893	149
362			Lrmp	Lymphoid-restricted membrane protein	LRMP_MOUSE	1	1.5	59.587	33.161	6
362			Elavl3	ELAV-like protein 3	ELAV3_MOUSE	1	2.2	39.533	33.161	1
362			Stk36	Serine/threonine-protein kinase 36	STK36_MOUSE	1	0.7	129.98	33.161	1
363			Synpo	Synaptopodin	SYNPO_MOUS	9	17.4	74.016	100	17
364			Pdha1	Pyruvate dehydrogenase E1 component subunit alpha, somatic form, mitochondrial	ODPA_MOUSE	15	40	43.231	61.1871	75
364			Hapln1	Hyaluronan and proteoglycan link protein 1	HPLN1_MOUSE	11	39.6	40.477	17.0167	39
365			Hsph1	Heat shock protein 105 kDa	HS105_MOUSE	35	49.4	91.696	69.6901	137
365			Add2	Beta-adducin	ADDB_MOUSE	19	30.2	80.641	20.8769	67
366			Eef1a2	Elongation factor 1-alpha 2	EF1A2_MOUSE	10	25.1	50.454	81.265	31
367			Lrmp	Lymphoid-restricted membrane protein	LRMP_MOUSE	1	1.5	59.587	39.6861	2
367			Stk36	Serine/threonine-protein kinase 36	STK36_MOUSE	1	0.7	129.98	39.6861	5
368			Aco2	Aconitate hydratase, mitochondrial	ACON_MOUSE	23	34.5	85.462	92.0906	78
369			Atp5a1	ATP synthase subunit alpha, mitochondrial	ATPA_MOUSE	24	49.9	59.752	72.1166	98
370			Lonp1	Lon protease homolog, mitochondrial	LONM_MOUSE	29	33.5	105.84	91.0448	87
371			Hsp90ab1	Heat shock protein HSP 90-beta	HS90B_MOUSE	29	41.6	83.28	57.5416	113
371			Hsp90aa1	Heat shock protein HSP 90-alpha	HS90A_MOUSE	26	36.2	84.787	31.3204	49
372			Pdhx	Pyruvate dehydrogenase protein X component, mitochondrial	ODPX_MOUSE	14	45.9	53.998	27.0353	51
372			Hspa8	Heat shock cognate 71 kDa protein	HSP7C_MOUSE	15	27.7	70.87	11.3213	31
372			Dlst	Dihydrolipoyllysine-residue succinyltransferase component of 2-oxoglutarate dehydrogenase complex, mitochondrial	ODO2_MOUSE	7	19.4	48.994	11.0486	19
373			Ear2	Eosinophil cationic protein 2	ECP2_MOUSE	1	6.4	17.62	32.8267	4
373			Fh	Fumarate hydratase, mitochondrial	FUMH_MOUSE	1	3	50.052	30.4175	0
373			Syn1	Synapsin-1	SYN1_MOUSE	11	23	70.034	16.7792	16
374			Alb	Serum albumin	ALBU_MOUSE	11	24.2	68.692	27.7167	22
374			Hgs	Hepatocyte growth factor-regulated tyrosine kinase substrate	HGS_MOUSE	7	9.4	86.014	19.6903	16
374			Tsnax	Translin-associated protein X	TSNAX_MOUSE	1	6.9	32.926	14.9596	1
375			Mif	Macrophage migration inhibitory factor	MIF_MOUSE	4	41.7	12.504	85.1092	14
376			Aco2	Aconitate hydratase, mitochondrial	ACON_MOUSE	23	34.7	85.462	100	70
377			Atp6v1g2	V-type proton ATPase subunit G 2	VATG2_MOUSE	4	45.8	13.651	46.4429	33
377			Mbp	Myelin basic protein	MBP_MOUSE	6	33.1	18.487	19.4246	30
378			Mccc1	Methylcrotonoyl-CoA carboxylase subunit alpha, mitochondrial	MCCA_MOUSE	25	44.6	79.343	50.0587	88
378			Syn2	Synapsin-2	SYN2_MOUSE	14	34.1	63.372	27.3046	46
379			Mpst	3-mercaptopyruvate sulfurtransferase	THTM_MOUSE	13	54.2	33.023	84.5024	88
380			Nefl	Neurofilament light polypeptide	NFL_MOUSE	23	42.7	61.508	49.0426	65
380			Irgq	Immunity-related GTPase family Q protein	IRGQ_MOUSE	10	23.5	59.323	27.3991	31
381			Bin1	Myc box-dependent-interacting protein 1	BIN1_MOUSE	16	31.5	64.469	73.687	57
382			Hsph1	Heat shock protein 105 kDa	HS105_MOUSE	24	38.6	91.696	41.6174	70
382			Add2	Beta-adducin	ADDB_MOUSE	19	29.9	80.641	36.4702	60
383			Tpm1	Tropomyosin alpha-1 chain	TPM1_MOUSE	9	20.8	32.708	56.3527	30
384			Ndufa5	NADH dehydrogenase [ubiquinone] 1 alpha subcomplex subunit 5	NDUA5_MOUSE	7	61.2	13.36	52.6838	34
384			Hbb-b1	Hemoglobin subunit beta-1	HBB1_MOUSE	6	45.6	15.84	25.5204	13
385			Fh	Fumarate hydratase, mitochondrial	FUMH_MOUSE	1	3	50.052	34.0639	0
385			Sept5	Septin-5	SEPT5_MOUSE	5	13	42.747	21.9927	11
386			Rhbdl2	Rhomboid-related protein 2	RHBL2_MOUSE	1	2.3	33.735	65.3432	1
386			Hnrnpa1	Heterogeneous nuclear ribonucleoprotein A1	ROA1_MOUSE	13	44.1	34.196	18.5772	71
386			Cyp1a2	Cytochrome P450 1A2	CP1A2_MOUSE	1	1.6	58.183	14.9782	1
387			Napb	Beta-soluble NSF attachment protein	SNAB_MOUSE	11	47.3	33.557	33.9489	27
387			Pcna	Proliferating cell nuclear antigen	PCNA_MOUSE	9	39.1	28.785	33.4968	20
388			Hsp90ab1	Heat shock protein HSP 90-beta	HS90B_MOUSE	32	44.9	83.28	73.2049	125
388			Hsp90aa1	Heat shock protein HSP 90-alpha	HS90A_MOUSE	29	41.5	84.787	24.6301	56
389			Hsph1	Heat shock protein 105 kDa	HS105_MOUSE	28	42.3	91.696	60.3585	103
389			Add2	Beta-adducin	ADDB_MOUSE	18	29.1	80.641	27.8097	62
390			Hspa4l	Heat shock 70 kDa protein 4L	HS74L_MOUSE	35	56.4	94.381	63.0208	88
390			Alb	Serum albumin	ALBU_MOUSE	25	43.9	68.692	31.2653	56
391			Mdh2	Malate dehydrogenase, mitochondrial	MDHM_MOUSE	12	48.2	35.611	75.0267	56
392			Epb41l3	Band 4.1-like protein 3	E41L3_MOUSE	12	19.2	101.99	33.1347	22
393			Lrmp	Lymphoid-restricted membrane protein	LRMP_MOUSE	1	1.5	59.587	24.6311	3
393			Elavl3	ELAV-like protein 3	ELAV3_MOUSE	1	2.2	39.533	24.6311	3
393			Stk36	Serine/threonine-protein kinase 36	STK36_MOUSE	1	0.7	129.98	24.6311	1
394			Rbmxl1	RNA binding motif protein, X-linked-like-1	RMXL1_MOUSE	7	18.8	42.161	65.5571	33
394			Psd3	PH and SEC7 domain-containing protein 3	PSD3_MOUSE	10	19.3	58.466	20.2941	25
395			Pgam5	Serine/threonine-protein phosphatase PGAM5, mitochondrial	PGAM5_MOUSE	11	41.3	31.994	64.4661	38
395			Vdac3	Voltage-dependent anion-selective channel protein 3	VDAC3_MOUSE	4	21.2	30.752	14.5173	8
396			Kif5b	Kinesin-1 heavy chain	KINH_MOUSE	42	49	109.55	74.1012	101
396			Dnajc6	Putative tyrosine-protein phosphatase auxilin	AUXI_MOUSE	15	18	98.52	17.335	31
397			Fus	RNA-binding protein FUS	FUS_MOUSE	3	7.1	52.673	38.7782	6
397			Syn1	Synapsin-1	SYN1_MOUSE	5	10.4	70.034	25.4568	8
397			Map6	Microtubule-associated protein 6	MAP6_MOUSE	4	12.5	61.104	19.0831	8
398			Pc	Pyruvate carboxylase, mitochondrial	PYC_MOUSE	44	44.2	129.68	99.3053	194
399			Hadha	Trifunctional enzyme subunit alpha, mitochondrial	ECHA_MOUSE	17	27.4	82.669	89.6284	61
400			Atp5a1	ATP synthase subunit alpha, mitochondrial	ATPA_MOUSE	25	52.3	59.752	46.138	112
400			Sept11	Septin-11	SEP11_MOUSE	19	45.9	49.694	36.5474	112
401			Rbmxl1	RNA binding motif protein, X-linked-like-1	RMXL1_MOUSE	7	19.1	42.161	37.4049	21
401			Cnp	2',3'-cyclic-nucleotide 3'-phosphodiesterase	CN37_MOUSE	10	24.5	44.654	19.0393	21
402			Tppp	Tubulin polymerization-promoting protein	TPPP_MOUSE	8	44.5	23.574	95.8721	32
403			Nsf	Vesicle-fusing ATPase	NSF_MOUSE	32	42.7	82.613	48.97	120
403			Fubp1	Far upstream element-binding protein 1	FUBP1_MOUSE	18	30.9	68.539	14.9283	59
405			Pgam1	Phosphoglycerate mutase 1	PGAM1_MOUSE	13	51.6	28.832	67.5706	57
405			Ca2	Carbonic anhydrase 2	CAH2_MOUSE	9	55.8	29.032	20.18	33
406			Actb	Actin, cytoplasmic 1	ACTB_MOUSE	16	53.1	41.736	89.0305	102
407			Cycs	Cytochrome c, somatic	CYC_MOUSE	7	56.2	11.605	61.5094	26
407			Ndufa6	NADH dehydrogenase [ubiquinone] 1 alpha subcomplex subunit 6	NDUA6_MOUSE	7	51.1	15.283	18.2526	31
408			Got2	Aspartate aminotransferase, mitochondrial	AATM_MOUSE	9	16	47.411	68.5043	19
408			Pgk1	Phosphoglycerate kinase 1	PGK1_MOUSE	7	19.4	44.55	26.8372	16
409			Acaa1a	3-ketoacyl-CoA thiolase A, peroxisomal	THIKA_MOUSE	13	40.8	43.953	48.1254	52
409			Hnrnpa3	Heterogeneous nuclear ribonucleoprotein A3	ROA3_MOUSE	11	33.1	37.086	25.1016	29
410			Add2	Beta-adducin	ADDB_MOUSE	20	33.1	80.641	41.6638	80
410			Hsph1	Heat shock protein 105 kDa	HS105_MOUSE	32	47.9	91.696	37.9758	95
411			Lrmp	Lymphoid-restricted membrane protein	LRMP_MOUSE	1	1.5	59.587	79.0627	6
412			Hsd17b4	Peroxisomal multifunctional enzyme type 2	DHB4_MOUSE	22	36.7	79.481	60.2636	68
412			Cul3	Cullin-3	CUL3_MOUSE	17	27.1	88.947	16.657	35
412			Syn1	Synapsin-1	SYN1_MOUSE	15	36.1	70.034	15.4902	26
413			Hsp90b1	Endoplasmin	ENPL_MOUSE	26	34.4	92.475	91.7628	95
414			Eef1a1	Elongation factor 1-alpha 1	EF1A1_MOUSE	6	14.5	50.113	44.8896	14
414			Vstm2a	V-set and transmembrane domain-containing protein 2A	VTM2A_MOUSE	1	6.4	25.876	11.3605	2
415			Nefm	Neurofilament medium polypeptide	NFM_MOUSE	39	49.1	95.915	90.1676	231
416			Suclg1	Succinyl-CoA ligase [ADP/GDP-forming] subunit alpha, mitochondrial	SUCA_MOUSE	8	28.3	36.154	92.9559	52
417			Suclg1	Succinyl-CoA ligase [ADP/GDP-forming] subunit alpha, mitochondrial	SUCA_MOUSE	6	25.7	36.154	31.1607	15
418			Anxa5	Annexin A5	ANXA5_MOUSE	17	56.7	35.752	78.1279	71
419			Slc25a22	Mitochondrial glutamate carrier 1	GHC1_MOUSE	8	30	34.67	78.9988	32
419			Pkm	Pyruvate kinase PKM	KPYM_MOUSE	6	12.6	57.984	13.4397	10
420			Add2	Beta-adducin	ADDB_MOUSE	15	24	80.641	30.6228	35
420			Hspa4	Heat shock 70 kDa protein 4	HSP74_MOUSE	19	26.8	94.132	22.1195	41
420			Hsph1	Heat shock protein 105 kDa	HS105_MOUSE	19	27.3	91.696	17.2615	31
421			Myef2	Myelin expression factor 2	MYEF2_MOUSE	15	24.7	61.733	47.2479	53
421			Prpf4	U4/U6 small nuclear ribonucleoprotein Prp4	PRP4_MOUSE	16	36.1	58.369	23.5492	37
422			Actg1	Actin, cytoplasmic 2	ACTG_MOUSE	16	54.7	41.792	93.3569	107
423			Actg1	Actin, cytoplasmic 2	ACTG_MOUSE	16	54.7	41.792	81.4922	45
424			Celf2	CUGBP Elav-like family member 2	CELF2_MOUSE	7	13.1	49.253	42.5783	24
424			Mapt	Microtubule-associated protein tau	TAU_MOUSE	10	34.1	38.96	26.3496	29
425			Rpl12	60S ribosomal protein L12	RL12_MOUSE	3	24.2	17.804	98.1263	19
426			Slc25a4	ADP/ATP translocase 1	ADT1_MOUSE	8	27.5	32.904	64.8697	21
426			Slc25a5	ADP/ATP translocase 2	ADT2_MOUSE	6	21.8	32.931	17.9627	5
427			Mdh1	Malate dehydrogenase, cytoplasmic	MDHC_MOUSE	6	16.8	36.511	74.3832	14
427			Slc25a4	ADP/ATP translocase 1	ADT1_MOUSE	6	20.1	32.904	13.0123	15
428			Tom1l2	TOM1-like protein 2	TM1L2_MOUSE	12	28.1	53.382	43.0085	26
428			Tuba1c	Tubulin alpha-1C chain	TBA1C_MOUSE	11	33.2	49.909	17.6422	20
429			G3bp2	Ras GTPase-activating protein-binding protein 2	G3BP2_MOUSE	16	41.7	54.087	77.563	77
429			Ak5	Adenylate kinase isoenzyme 5	KAD5_MOUSE	11	22.4	63.322	10.8659	25
430			Anxa7	Annexin A7	ANXA7_MOUSE	17	34.6	49.925	45.0716	76
430			Pacsin1	Protein kinase C and casein kinase substrate in neurons protein 1	PACN1_MOUSE	15	38.5	50.575	41.2432	66
431			Khdrbs1	KH domain-containing, RNA-binding, signal transduction-associated protein 1	KHDR1_MOUSE	4	12	48.37	50.3917	12
431			Syn1	Synapsin-1	SYN1_MOUSE	16	40.7	70.034	34.8506	31
432			Pfkl	ATP-dependent 6-phosphofructokinase, liver type	PFKAL_MOUSE	20	33.2	85.359	58.8436	50
432			Aco2	Aconitate hydratase, mitochondrial	ACON_MOUSE	16	23.3	85.462	20.1447	34
433			Stk36	Serine/threonine-protein kinase 36	STK36_MOUSE	1	0.7	129.98	57.1859	2
434			Bin1	Myc box-dependent-interacting protein 1	BIN1_MOUSE	15	34.9	64.469	48.7952	40
434			Hspa	78 kDa glucose-regulated protein	GRP78_MOUSE	20	37.9	72.421	23.1078	41
434			Tuba1c	Tubulin alpha-1C chain	TBA1C_MOUSE	9	30.7	49.909	21.4876	26
435			Bin1	Myc box-dependent-interacting protein 1	BIN1_MOUSE	14	29.8	64.469	77.5826	49
435			Hspa4	Heat shock 70 kDa protein 4	HSP74_MOUSE	10	14.4	94.132	12.9593	21
436			Lrmp	Lymphoid-restricted membrane protein	LRMP_MOUSE	1	1.5	59.587	30.8865	3
436			Elavl3	ELAV-like protein 3	ELAV3_MOUSE	1	2.2	39.533	30.8865	1
436			Stk36	Serine/threonine-protein kinase 36	STK36_MOUSE	1	0.7	129.98	30.8865	2
437			Sf1	Splicing factor 1	SF01_MOUSE	12	26.8	59.656	43.807	49
437			Tf	Serotransferrin	TRFE_MOUSE	21	29.4	76.723	17.5691	43
437			Aco2	Aconitate hydratase, mitochondrial	ACON_MOUSE	16	24.5	85.462	13.5924	32
438			St13	Hsc70-interacting protein	F10A1_MOUSE	7	17.8	41.655	51.04	27
438			Psmf1	Proteasome inhibitor PI31 subunit	PSMF1_MOUSE	8	35.8	29.664	27.3371	34
439			Baiap2	Brain-specific angiogenesis inhibitor 1-associated protein 2	BAIP2_MOUSE	15	35.7	53.274	36.1985	40
439			Eif2s3x	Eukaryotic translation initiation factor 2 subunit 3, X-linked	IF2G_MOUSE	10	27.5	51.065	26.6351	31
439			Mapt	Microtubule-associated protein tau	TAU_MOUSE	8	27.2	38.96	16.4344	22
440			Samm50	Sorting and assembly machinery component 50 homolog	SAM50_MOUSE	22	58.6	51.863	64.3981	99
440			Atp5a1	ATP synthase subunit alpha, mitochondrial	ATPA_MOUSE	21	45	59.752	17.0017	65
441			Ddx1	ATP-dependent RNA helicase DDX1	DDX1_MOUSE	20	32.8	82.499	51.3849	44
441			Aco2	Aconitate hydratase, mitochondrial	ACON_MOUSE	13	19.2	85.462	16.6291	32
441			Rph3a	Rabphilin-3A	RP3A_MOUSE	12	26.3	75.488	15.5304	25
443			Mdh2	Malate dehydrogenase, mitochondrial	MDHM_MOUSE	13	51.8	35.611	51.9654	45
443			Ak4	Adenylate kinase 4, mitochondrial	KAD4_MOUSE	11	67.7	25.061	28.8943	36
444			Lonp1	Lon protease homolog, mitochondrial	LONM_MOUSE	19	23.9	105.84	55.5289	39
444			Elac2	Zinc phosphodiesterase ELAC protein 2	RNZ2_MOUSE	1	1.1	92.075	37.5798	1
445			Elavl3	ELAV-like protein 3	ELAV3_MOUSE	1	2.2	39.533	40.8836	2
445			Stk36	Serine/threonine-protein kinase 36	STK36_MOUSE	1	0.7	129.98	40.8836	1
446			Eef1a1	Elongation factor 1-alpha 1	EF1A1_MOUSE	2	16.2	50.113	53.7112	12
446			Slc25a4	ADP/ATP translocase 1	ADT1_MOUSE	3	10.7	32.904	19.7753	4
446			Eef1a2	Elongation factor 1-alpha 2	EF1A2_MOUSE	2	17.3	50.454	11.7722	3
447			Frk	Tyrosine-protein kinase FRK	FRK_MOUSE	2	6.2	58.843	41.2928	2
447			Psma2	Proteasome subunit alpha type-2	PSA2_MOUSE	8	43.6	25.926	30.8631	15
448			Tollip	Toll-interacting protein	TOLIP_MOUSE	10	54.7	30.345	66.4025	32
449			Ywhab	14-3-3 protein beta/alpha	1433B_MOUSE	6	34	27.854	51.1097	22
449			Ywhaq	14-3-3 protein theta	1433T_MOUSE	8	39.5	27.7	25.9322	36
450			Vcp	Transitional endoplasmic reticulum ATPase	TERA_MOUSE	19	30.4	89.321	42.92	69
450			Tuba1c	TBA1C_MOUSE Tubulin alpha-1C chain	TBA1C_MOUSE	2	8.2	49.909	20.7622	46
451			Gpi	Glucose-6-phosphate isomerase	G6PI_MOUSE	15	34.8	62.766	82.7178	50
452			Slc25a5	ADP/ATP translocase 2	ADT2_MOUSE	7	22.8	32.931	92.4653	44
453			Nsf	Vesicle-fusing ATPase	NSF_MOUSE	34	44.1	82.613	37.5228	132
453			Wdr1	WD repeat-containing protein 1	WDR1_MOUSE	20	44.2	66.406	30.5701	70
454			Glud1	Glutamate dehydrogenase 1, mitochondrial	DHE3_MOUSE	21	45.2	61.336	48.3656	88
454			Gsr	Glutathione reductase, mitochondrial	GSHR_MOUSE	9	30.4	51.073	13.121	25
455			Sgta	Small glutamine-rich tetratricopeptide repeat-containing protein alpha	SGTA_MOUSE	8	30.3	34.194	30.4096	25
455			Tuba1b	Tubulin alpha-1B chain	TBA1B_MOUSE	1	2.9	50.151	11.6894	20
456			Glul	Glutamine synthetase	GLNA_MOUSE	16	50.4	42.119	84.8023	58
457			Hspa8	Heat shock cognate 71 kDa protein	HSP7C_MOUSE	7	15.6	70.87	47.6481	24
457			Ppp1r1b	Protein phosphatase 1 regulatory subunit 1B	PPR1B_MOUSE	6	43.8	21.78	37.2243	24
458			Ppia	Peptidyl-prolyl cis-trans isomerase A	PPIA_MOUSE	9	60.4	17.971	88.0621	56
459			Hnrnpa2b1	Heterogeneous nuclear ribonucleoproteins A2/B1	ROA2_MOUSEE	17	56.9	35.979	71.9872	55
459			Mdh2	Malate dehydrogenase, mitochondrial	MDHM_MOUSE	13	49.7	35.611	20.4317	48
460			Hint1	Histidine triad nucleotide-binding protein 1	HINT1_MOUSE	6	71.4	13.777	66.2425	35
460			Rps12	40S ribosomal protein S12	RS12_MOUSE	5	50.8	14.525	24.2639	24
461			Mthfd1	C-1-tetrahydrofolate synthase, cytoplasmic	C1TC_MOUSE	35	42.7	101.2	55.9069	119
461			Eef2	Elongation factor 2	EF2_MOUSE	26	34.1	95.313	21.0897	78
462			Atp5a1	ATP synthase subunit alpha, mitochondrial	ATPA_MOUSE	11	23.3	59.752	45.1598	38
462			Hnrnpa3	Heterogeneous nuclear ribonucleoprotein A3	ROA3_MOUSE	10	28.5	39.652	39.52	37
463			Uba1	Ubiquitin-like modifier-activating enzyme 1	UBA1_MOUSE	32	41.7	117.81	75.5808	104
464			Mthfd1l	Monofunctional C1-tetrahydrofolate synthase, mitochondrial	C1TM_MOUSE	29	37.3	105.73	67.8306	85
464			Frk	Tyrosine-protein kinase FRK	FRK_MOUSE	2	6.2	58.843	14.3616	1
465			Mthfd1l	Monofunctional C1-tetrahydrofolate synthase, mitochondrial	C1TM_MOUSE	4	6.9	105.73	72.3694	12
466			Dpysl2	Dihydropyrimidinase-related protein 2	DPYL2_MOUSE	23	62.4	62.277	50.2147	104
466			Hspa9	Stress-70 protein, mitochondrial	GRP75_MOUSE	27	48.5	73.46	35.1035	102
467			Dpysl2	Dihydropyrimidinase-related protein 2	DPYL2_MOUSE	5	16.1	62.277	38.0924	17
467			Rogdi	Protein rogdi homolog	ROGDI_MOUSE	9	43.2	32.1	31.6425	36
468			Sptan1	Isoform 2 of Spectrin alpha chain, non-erythrocytic 1	SPTN1_MOUSE	13	6.4	282.34	24.9019	49
469			Vcp	Transitional endoplasmic reticulum ATPase	TERA_MOUSE	15	23.9	89.321	23.3146	30
469			Uba1	Ubiquitin-like modifier-activating enzyme 1	UBA1_MOUSE	7	9.1	117.81	17.3528	16
470			Atp5c1	ATP synthase subunit gamma, mitochondrial	ATPG_MOUSE	8	28.9	32.886	83.3765	31
471			Dpysl2	Dihydropyrimidinase-related protein 2	DPYL2_MOUSE	21	54.4	62.277	45.431	97
471			Hspa8	HSP7C_MOUSE Heat shock cognate 71 kDa protein	HSP7C_MOUSE	26	49.1	70.87	38.2234	120
472			Pcnx4	Isoform 2 of Pecanex-like protein 4	PCX4_MOUSE	1	8.3	25.61	44.6243	3
472			Dpysl2	Dihydropyrimidinase-related protein 2	DPYL2_MOUSE	3	9.8	62.277	31.9	8
473			Got2	Aspartate aminotransferase, mitochondrial	AATM_MOUSE	22	52.6	47.411	96.8115	62
474			Hspa8	Heat shock cognate 71 kDa	HSP7C_MOUSE	17	34.8	70.87	26.9481	56
474			Actg1	Actin, cytoplasmic 2	ACTG_MOUSE	5	24.5	41.792	12.0006	37
475			Hbb-b1	Hemoglobin subunit beta-1	HBB1_MOUSE	2	17.7	15.84	49.3118	4
475			Rps21	40S ribosomal protein S21	RS21_MOUSE	3	47	9.1413	35.905	7
476			Pabpc1	Polyadenylate-binding protein 1	PABP1_MOUSE	22	34.3	70.67	52.1369	73
476			Frk	Tyrosine-protein kinase FRK	FRK_MOUSE	2	6.2	58.843	19.034	3
477			Pgp	Phosphoglycolate phosphatase	PGP_MOUSE	11	45.5	34.54	29.4629	30
477			Sgta	Isoform 2 of Small glutamine-rich tetratricopeptide repeat-containing protein alpha	SGTA_MOUSE	7	27.4	34.194	24.5333	24
477			Tuba1c	TBA1C_MOUSE Tubulin alpha-1C chain	TBA1C_MOUSE	2	8.2	49.909	21.0349	27
478			Stxbp1	Syntaxin-binding protein 1	STXB1_MOUSE	15	29.3	67.568	60.7054	40
478			Eno1	Alpha-enolase	ENOA_MOUSE	7	23.7	47.14	16.9107	16
479			Slc25a12	Calcium-binding mitochondrial carrier protein Aralar1	CMC1_MOUSE	22	38.8	74.569	91.4534	79
480			Hspa8	Heat shock cognate 71 kDa protein	HSP7C_MOUSE	25	46	70.87	88.9573	122
481			Hsph1	Heat shock protein 105 kDa	HS105_MOUSE	28	41.4	91.696	51.7798	99
481			Add2	Beta-adducin	ADDB_MOUSE	19	32.3	80.641	33.0172	74
482			Hspa4l	Heat shock 70 kDa protein 4L	HS74L_MOUSE	28	40.9	94.381	90.2677	90
483			Pdha1	Pyruvate dehydrogenase E1 component subunit alpha, somatic form, mitochondrial	ODPA_MOUSE	17	47.9	43.231	68.2268	54
483			Fh	Fumarate hydratase, mitochondrial	FUMH_MOUSE	13	43.7	50.052	28.1332	57
484			Pef1	Peflin	PEF1_MOUSE	4	16.4	29.227	26.911	12
484			Clic1	Chloride intracellular channel protein 1	CLIC1_MOUSE	4	21.2	27.013	17.9147	9
485			Tuba1c	Tubulin alpha-1C	TBA1C_MOUSE	2	8.2	49.909	28.5428	40
485			Dbt	Lipoamide acyltransferase component of branched-chain alpha-keto acid dehydrogenase complex, mitochondrial	ODB2_MOUSE	19	44.4	53.246	24.2058	60
485			Aldh2	Aldehyde dehydrogenase, mitochondrial	ALDH2_MOUSE	14	36.8	56.537	16.0938	43
486			Dpysl2	Dihydropyrimidinase-related protein 2	DPYL2_MOUSE	12	33.2	62.277	46.5282	47
486			Tuba1b	Tubulin alpha-1B chain	TBA1B_MOUSE	0	0	50.151	12.0576	32
487			Etfdh	Electron transfer flavoprotein-ubiquinone oxidoreductase, mitochondrial	ETFD_MOUSE	16	32.3	68.09	38.2856	48
487			Stxbp1	Syntaxin-binding protein 1	STXB1_MOUSE	15	25.4	67.568	31.612	48
488			Vcp	Transitional endoplasmic reticulum ATPase	TERA_MOUSE	38	56.1	89.321	89.278	145
489			Dpysl2	Dihydropyrimidinase-related protein 2	DPYL2_MOUSE	20	51.7	62.277	73.0509	78
489			Alb	Serum albumin	ALBU_MOUSE	20	33.6	68.692	23.5078	67
490			Got2	Aspartate aminotransferase, mitochondrial	AATM_MOUSE	23	51.2	47.411	94.6959	75
491			Opa1	Dynamin-like 120 kDa protein, mitochondrial	OPA1_MOUSE	39	48.2	111.34	68.5262	129
491			Got2	Aspartate aminotransferase, mitochondrial	AATM_MOUSE	4	13	47.411	25.3168	12
492			Actg1	Actin, cytoplasmic 2	ACTG_MOUSE	7	27.5	41.792	43.9814	65
492			Tmod1	Tropomodulin-1	TMOD1_MOUSE	20	62.1	40.466	16.1348	64
493			Eci1	Enoyl-CoA delta isomerase 1, mitochondrial	ECI1_MOUSE	9	36	32.25	83.899	33
494			Hyou1	Hypoxia up-regulated protein 1	HYOU1_MOUSE	36	44.7	111.18	51.5053	133
494			Sptan1	Spectrin alpha chain, non-erythrocytic 1	SPTN1_MOUSE	51	25.1	284.59	20.3135	120
494			Plcb1	Isoform C of 1-phosphatidylinositol 4,5-bisphosphate phosphodiesterase beta-1	PLCB1_MOUSE	32	31.8	136.31	16.6289	81
495			Me2	NAD-dependent malic enzyme, mitochondrial	MAOM_MOUSE	17	33.3	65.798	35.0672	67
495			Crmp1	Dihydropyrimidinase-related protein 1	DPYL1_MOUSE	23	57.2	62.167	30.8453	55
496			Hspa8	Heat shock cognate 71 kDa protein	HSP7C_MOUSE	18	33.4	70.87	42.3834	49
496			Ppp3ca	Serine/threonine-protein phosphatase 2B catalytic subunit alpha isoform	PP2BA_MOUSE	10	21.3	58.643	24.6005	33
497			Dnm3	Dynamin-3	DYN3_MOUSE	20	25.1	96.803	55.9383	101
497			Frk	Tyrosine-protein kinase FRK	FRK_MOUSE	2	6.2	58.843	29.2956	3
498			Sptan1	Spectrin alpha chain, non-erythrocytic 1	SPTN1_MOUSE	76	37.6	282.34	66.3736	240
498			Hyou1	Hypoxia up-regulated protein 1	HYOU1_MOUSE	23	32	111.18	16.4688	72
499			Tkt	Transketolase	TKT_MOUSE	18	37.4	67.63	37.072	50
499			Dpysl4	Dihydropyrimidinase-related protein 4	DPYL4_MOUSE	20	51	61.961	36.8252	40
499			Stxbp1	Syntaxin-binding protein 1	STXB1_MOUSE	11	22.9	67.568	13.1465	27
500			Sept7	Septin-7	SEPT7_MOUSE	13	27.3	50.549	85.671	30
